# Supplementary material for: Effect of unsaturated substituents in the reaction of Criegee intermediates with water vapor
Source: Royal Society of Chemistry journal article supplement (doi:10.1039/c8cp02064g), 2018-01-01
Supplement: c8cp02064g1.pdf [file c8cp02064g1.pdf]

Electronic Supplementary Information for  
“Effect of unsaturated substituents in the reaction of  
Criegee intermediates with water vapor”

Cangtao Yin, Kaito Takahashi\*

*Institute of Atomic and Molecular Science, Academia Sinica, Taipei 10617, Taiwan*

AUTHOR INFORMATION

**Corresponding Author**

\*kt@gate.sinica.edu.tw

This supplementary material includes: the complete list of zero-point corrected energies, the distortion energy, the Mulliken charge distribution of central carbon and  $\beta$  carbon in  $\text{CH}_2\text{CHCHO}$ , all the rate coefficients calculated in this work, variational effect for the lowest channel for each CI reaction with water monomer and water dimer, and the geometry parameters including reactant, van der Waals (vdW) complex, and TS.

In Table S1 we list the all the zero-point corrected energies for van der Waals (vdW) complex and transition state (TS) studied in this work. It is an extension of Table 1 of main text, where we only listed the lowest channel for each reaction.

**Table S1** Complete list of zero-point corrected energies for van der Waals (vdW) complex and transition state (TS), in kcal mol<sup>-1</sup>. Energies are from QCISD(T)/CBS//B3LYP/6-311+G(2d,2p) and zero-point correction using B3LYP/6-311+G(2d,2p).

| <i>anti-type</i> CIs                                        | H <sub>2</sub> O | vdW   | TS    | (H <sub>2</sub> O) <sub>2</sub> | vdW    | TS    |
|-------------------------------------------------------------|------------------|-------|-------|---------------------------------|--------|-------|
| CH <sub>2</sub> OO                                          | 1a               | -6.30 | 3.92  | 2a                              | -10.13 | -5.89 |
|                                                             | 1b               | -6.30 | 3.05  | 2b                              | -10.32 | -5.80 |
|                                                             |                  |       |       | 2c                              | -9.84  | -4.63 |
|                                                             |                  |       |       | 2d                              | -10.02 | -5.68 |
| <i>anti</i> -CH <sub>3</sub> CHOO                           | 1a               | -7.80 | 1.20  | 2a                              | -12.96 | -6.74 |
|                                                             | 1b               | -7.80 | 0.59  | 2b                              | -13.37 | -7.01 |
|                                                             |                  |       |       | 2c                              | -12.96 | -5.79 |
|                                                             |                  |       |       | 2d                              | -13.37 | -6.49 |
| <i>anti_Syn</i> -CH <sub>3</sub> CH <sub>2</sub> CHOO       | 1a               | -8.04 | 0.63  | 2a                              | -13.31 | -6.90 |
|                                                             | 1b               | -8.04 | 0.25  | 2b                              | -13.72 | -7.43 |
|                                                             |                  |       |       | 2c                              | -13.31 | -6.26 |
|                                                             |                  |       |       | 2d                              | -13.72 | -6.61 |
| <i>anti_Gauche</i> -CH <sub>3</sub> CH <sub>2</sub> CHOO    | 1a               | -7.86 | 1.14  | 2a                              | -12.26 | -6.76 |
|                                                             | 1b               | -7.86 | 0.46  | 2b                              | -12.74 | -7.37 |
|                                                             |                  |       |       | 2c                              | -12.33 | -6.17 |
|                                                             |                  |       |       | 2d                              | -12.74 | -6.52 |
|                                                             | 1a'              | -7.98 | 0.86  | 2a'                             | -12.96 | -7.23 |
|                                                             | 1b'              | -7.98 | 0.45  | 2b'                             | -13.37 | -7.43 |
|                                                             |                  |       |       | 2c'                             | -12.96 | -6.21 |
|                                                             |                  |       |       | 2d'                             | -13.37 | -6.99 |
| <i>anti_Syn</i> -CH <sub>2</sub> CHCHOO_carbonyl insertion  | 1a               | -6.45 | 4.16  | 2a                              | -10.67 | -4.02 |
|                                                             | 1b               | -6.45 | 3.15  | 2b                              | -10.75 | -3.16 |
|                                                             |                  |       |       | 2c                              | -10.67 | -1.85 |
|                                                             |                  |       |       | 2d                              | -10.75 | -3.78 |
| <i>anti_Syn</i> -CH <sub>2</sub> CHCHOO_vinyl insertion     | not found        |       |       | 2a                              | -10.60 | 7.84  |
|                                                             |                  |       |       | 2b                              | -10.60 | 7.68  |
|                                                             |                  |       |       | 2c                              | -10.60 | 8.34  |
|                                                             |                  |       |       | 2d                              | -10.60 | 8.26  |
| <i>anti_Anti</i> -CH <sub>2</sub> CHCHOO_carbonyl insertion | 1a               | -6.77 | 5.22  | 2a                              | -11.90 | -2.01 |
|                                                             | 1b               | -6.77 | 4.18  | 2b                              | -11.90 | -1.96 |
|                                                             |                  |       |       | 2c                              | -11.90 | -0.67 |
|                                                             |                  |       |       | 2d                              | -11.90 | -1.72 |
| <i>anti_Anti</i> -CH <sub>2</sub> CHCHOO_vinyl insertion    | 1a               | -6.78 | 32.14 | 2a                              | -11.90 | 11.82 |
|                                                             |                  |       |       | 2b                              | -11.90 | 11.57 |
| <i>anti</i> -CHCCHOO                                        | 1a               | -5.97 | 6.03  | 2a                              | -9.24  | -2.35 |
|                                                             | 1b               | -5.97 | 4.76  | 2b                              | -9.31  | -1.62 |

|                                                            |                  |       |       |                                 |        |       |
|------------------------------------------------------------|------------------|-------|-------|---------------------------------|--------|-------|
|                                                            |                  |       |       | 2c                              | -9.24  | -0.31 |
|                                                            |                  |       |       | 2d                              | -9.62  | -2.09 |
| <b>syn-type Cls</b>                                        | H <sub>2</sub> O | vdW   | TS    | (H <sub>2</sub> O) <sub>2</sub> | vdW    | TS    |
| <i>syn</i> -CH <sub>3</sub> CHOO                           | 1a               | -6.67 | 8.59  | 2a                              | -11.15 | -2.46 |
|                                                            | 1b               | -6.67 | 7.20  | 2b                              | -11.43 | -2.42 |
|                                                            |                  |       |       | 2c                              | -11.14 | -0.87 |
|                                                            |                  |       |       | 2d                              | -11.43 | -2.77 |
|                                                            |                  |       |       |                                 |        |       |
| (CH <sub>3</sub> ) <sub>2</sub> COO                        | 1a               | -7.83 | 6.66  | 2a                              | -13.10 | -2.45 |
|                                                            | 1b               | -7.83 | 5.57  | 2b                              | -13.57 | -2.66 |
|                                                            |                  |       |       | 2c                              | -13.10 | -1.07 |
|                                                            |                  |       |       | 2d                              | -12.73 | -1.89 |
|                                                            |                  |       |       |                                 |        |       |
| <i>syn</i> _Anti-CH <sub>3</sub> CH <sub>2</sub> CHOO      | 1a               | -6.75 | 8.45  | 2a                              | -11.79 | -3.06 |
|                                                            | 1b               | -6.75 | 6.70  | 2b                              | -11.95 | -2.73 |
|                                                            | 1a'              | -6.75 | 7.96  | 2c                              | -11.79 | -1.15 |
|                                                            | 1b'              | -6.75 | 6.73  | 2d                              | -11.95 | -3.37 |
|                                                            |                  |       |       |                                 |        |       |
| <i>syn</i> _Gauche-CH <sub>3</sub> CH <sub>2</sub> CHOO    | 1a               | -6.38 | 9.94  | 2a                              | -11.33 | -4.01 |
|                                                            | 1b               | -6.38 | 8.58  | 2b                              | -11.61 | -4.13 |
|                                                            |                  |       |       | 2c                              | -11.33 | -2.65 |
|                                                            |                  |       |       | 2d                              | -11.61 | -4.24 |
|                                                            |                  |       |       | 2a'                             | -10.57 | -1.19 |
|                                                            |                  |       |       | 2b'                             | -10.90 | -1.17 |
|                                                            |                  |       |       | 2c'                             | -10.57 | 0.48  |
|                                                            |                  |       |       | 2d'                             | -10.90 | -1.36 |
|                                                            |                  |       |       |                                 |        |       |
|                                                            |                  |       |       |                                 |        |       |
| <i>syn</i> _Syn-CH <sub>2</sub> CHCHOO_carbonyl insertion  | 1a               | -4.44 | 11.19 | 2a                              | -8.76  | 2.38  |
|                                                            | 1b               | -4.44 | 10.78 | 2b                              | -9.13  | 2.10  |
|                                                            |                  |       |       | 2c                              | -8.76  | 3.42  |
|                                                            |                  |       |       | 2d                              | -9.13  | 2.61  |
|                                                            |                  |       |       |                                 |        |       |
| <i>syn</i> _Syn-CH <sub>2</sub> CHCHOO_vinyl insertion     | 1a               | -4.44 | 9.61  | 2a                              | -7.48  | 3.88  |
|                                                            | 1b               | -4.44 | 9.53  | 2b                              | -7.38  | 4.44  |
|                                                            |                  |       |       | 2c                              | -7.48  | 4.92  |
|                                                            |                  |       |       | 2d                              | -7.38  | 4.58  |
|                                                            |                  |       |       |                                 |        |       |
| <i>syn</i> _Anti-CH <sub>2</sub> CHCHOO_carbonyl insertion | 1a               | -5.88 | 8.21  | 2a                              | -10.02 | 0.73  |
|                                                            | 1b               | -5.88 | 8.22  | 2b                              | -10.21 | -0.75 |
|                                                            |                  |       |       | 2c                              | -10.02 | 0.67  |
|                                                            |                  |       |       | 2d                              | -10.31 | 0.64  |
|                                                            |                  |       |       |                                 |        |       |
| <i>syn</i> _Anti-CH <sub>2</sub> CHCHOO_vinyl insertion    | 1a               | -5.89 | 26.51 | 2a                              | -9.33  | 8.88  |
|                                                            |                  |       |       | 2b                              | -9.33  | 7.93  |
|                                                            |                  |       |       |                                 |        |       |
| <i>syn</i> -CHCCHOO                                        | 1a               | -4.68 | 9.18  | 2a                              | -8.71  | 0.75  |
|                                                            | 1b               | -4.68 | 9.60  | 2b                              | -8.99  | -0.27 |
|                                                            |                  |       |       | 2c                              | -8.71  | 0.87  |
|                                                            |                  |       |       | 2d                              | -8.80  | 1.19  |
|                                                            |                  |       |       |                                 |        |       |

The distortion energy versus reaction barrier is listed in Table S2 and plotted in Figure S1, see below.

**Table S2** distortion energy versus reaction barrier for Cls react with (a) H<sub>2</sub>O and (b) (H<sub>2</sub>O)<sub>2</sub>

| Cl <sub>s</sub>    | channel | Reactant to TS energy | distortion-Cl | distortion-water |
|--------------------|---------|-----------------------|---------------|------------------|
| CH <sub>2</sub> OO | 1a      | 1.31                  | 12.14         | 6.19             |
|                    | 1b      | 0.33                  | 11.77         | 5.65             |
|                    | 2a      | -9.11                 | 7.45          | 15.55            |

|                                         |    |       |       |       |
|-----------------------------------------|----|-------|-------|-------|
|                                         | 2b | -8.89 | 7.84  | 16.54 |
|                                         | 2c | -7.51 | 8.34  | 18.26 |
|                                         | 2d | -8.87 | 7.39  | 16.47 |
| <i>anti</i> -CH <sub>3</sub> CHOO       | 1a | -0.70 | 11.83 | 10.05 |
|                                         | 1b | -1.47 | 11.60 | 9.48  |
|                                         | 2a | -9.00 | 8.27  | 22.04 |
|                                         | 2b | -9.12 | 8.41  | 23.22 |
|                                         | 2c | -7.68 | 8.73  | 25.04 |
|                                         | 2d | -8.74 | 8.23  | 22.83 |
| <i>syn</i> -CH <sub>3</sub> CHOO        | 1a | 6.53  | 18.87 | 7.96  |
|                                         | 1b | 5.18  | 18.34 | 7.92  |
|                                         | 2a | -4.34 | 10.20 | 24.16 |
|                                         | 2b | -4.32 | 10.59 | 24.40 |
|                                         | 2c | -2.62 | 11.40 | 25.48 |
|                                         | 2d | -4.65 | 9.67  | 25.64 |
| (CH <sub>3</sub> ) <sub>2</sub> COO     | 1a | 5.27  | 18.77 | 11.87 |
|                                         | 1b | 4.17  | 18.18 | 11.95 |
|                                         | 2a | -3.57 | 10.36 | 31.52 |
|                                         | 2b | -3.72 | 10.49 | 32.21 |
|                                         | 2c | -1.99 | 11.24 | 33.23 |
|                                         | 2d | -3.87 | 9.85  | 33.20 |
| <i>anti</i> _Anti-CH <sub>2</sub> CHCHO | 1a | 3.99  | 12.07 | 14.69 |
|                                         | 1b | 2.88  | 11.54 | 14.75 |
|                                         | 2a | -3.05 | 9.03  | 29.28 |
|                                         | 2b | -2.98 | 9.47  | 29.03 |
|                                         | 2c | -1.51 | 9.70  | 30.56 |
|                                         | 2d | -2.79 | 9.06  | 29.68 |
| <i>anti</i> _Syn-CH <sub>2</sub> CHCHO  | 1a | 2.86  | 10.66 | 14.09 |
|                                         | 1b | 1.59  | 10.86 | 12.02 |
|                                         | 2a | -5.51 | 8.46  | 26.32 |
|                                         | 2b | -4.37 | 8.64  | 28.84 |
|                                         | 2c | -2.83 | 8.74  | 30.92 |
|                                         | 2d | -5.29 | 8.48  | 26.98 |
| <i>syn</i> _Anti-CH <sub>2</sub> CHCHO  | 1a | 6.84  | 15.89 | 10.90 |
|                                         | 1b | 7.01  | 16.05 | 11.56 |
|                                         | 2a | -0.10 | 9.85  | 30.57 |
|                                         | 2b | -1.90 | 10.33 | 28.33 |
|                                         | 2c | -0.33 | 10.79 | 29.41 |
|                                         | 2d | -0.16 | 9.50  | 32.80 |
| <i>syn</i> _Syn-CH <sub>2</sub> CHCHO   | 1a | 10.06 | 19.56 | 10.15 |
|                                         | 1b | 9.70  | 20.19 | 9.90  |
|                                         | 2a | 1.57  | 12.37 | 29.26 |
|                                         | 2b | 1.24  | 11.77 | 29.82 |
|                                         | 2c | 2.69  | 12.55 | 30.54 |
|                                         | 2d | 1.88  | 11.84 | 31.67 |

|                      |                     |       |       |       |
|----------------------|---------------------|-------|-------|-------|
| <i>anti</i> -CHCCHOO | 1a                  | 4.43  | 11.94 | 11.62 |
|                      | 1b                  | 3.01  | 11.71 | 10.54 |
|                      | 2a                  | -4.23 | 9.16  | 22.76 |
|                      | 2b                  | -3.25 | 9.20  | 24.36 |
|                      | 2c                  | -1.73 | 9.45  | 26.09 |
|                      | 2d                  | -3.99 | 9.13  | 23.22 |
|                      | <i>syn</i> -CHCCHOO | 1a    | 7.51  | 16.38 |
| 1b                   |                     | 8.03  | 16.56 | 8.97  |
| 2a                   |                     | -0.78 | 9.88  | 24.43 |
| 2b                   |                     | -1.91 | 10.22 | 23.82 |
| 2c                   |                     | -0.62 | 10.53 | 25.08 |
| 2d                   |                     | -0.21 | 9.75  | 26.31 |

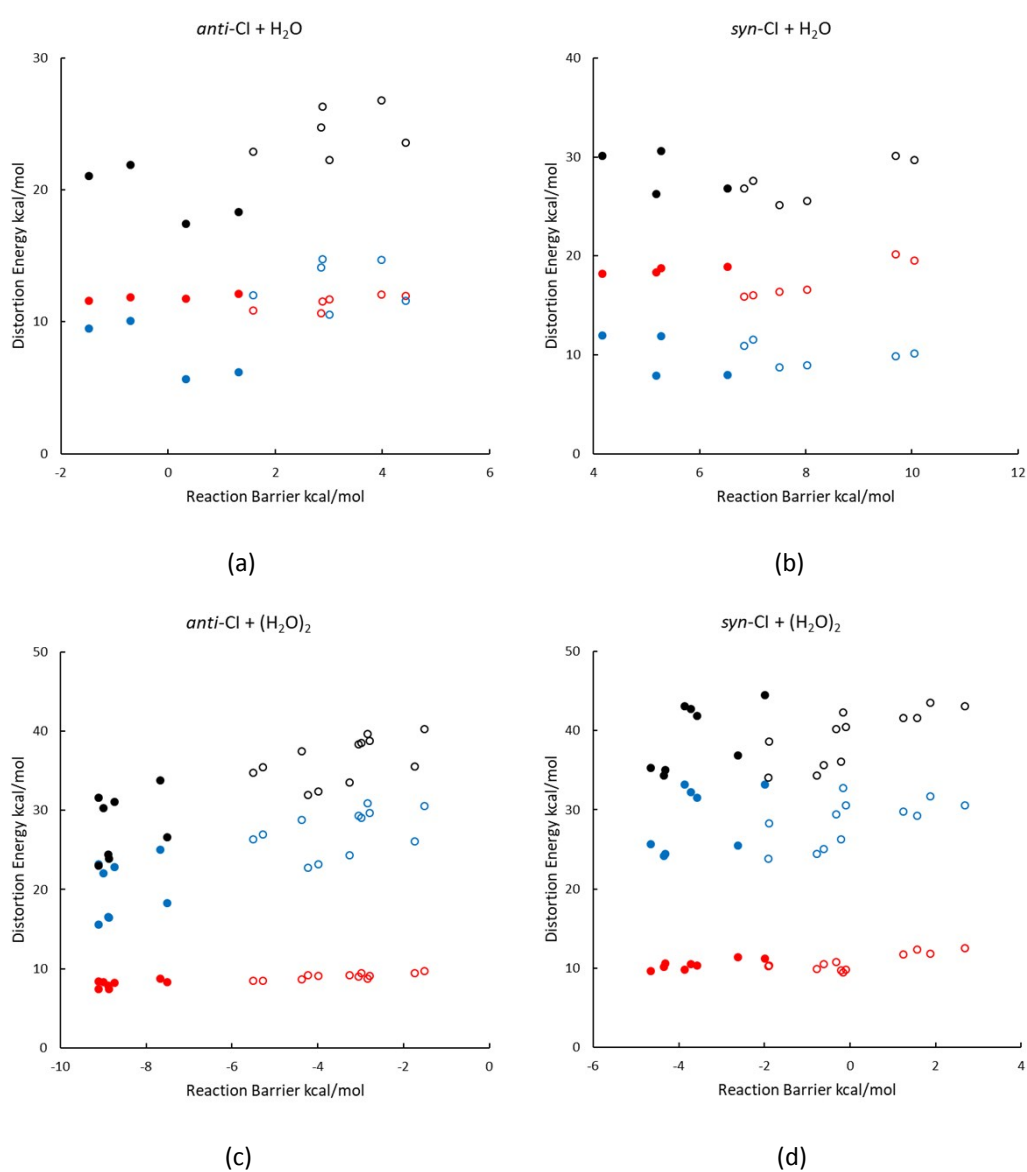

**Figure S1** Distortion energy versus reaction barrier for the reaction of (a) *anti*-Cl with H<sub>2</sub>O, (b) *syn*-Cl with H<sub>2</sub>O, (c) *anti*-Cl with (H<sub>2</sub>O)<sub>2</sub>, and (d) *syn*-Cl with (H<sub>2</sub>O)<sub>2</sub>. Red circles are the Cl's contribution, blue

circles are the water's contribution, and black circles are the total distortion energy. Solid ones are for saturated CIs and empty ones are for unsaturated CIs, respectively.

To explain the different energy barrier between vinyl insertion and the carbonyl insertion reaction for  $\text{CH}_2\text{CHCHO}$ , here we listed the Mulliken charge distribution of central carbon and  $\beta$  carbon in  $\text{CH}_2\text{CHCHO}$ , along with energy barriers. One can clearly see that the carbonyl oxygen has a larger positive charge compared to the vinyl carbon.

**Table S3** The Mulliken charge distribution of carbonyl carbon and vinyl-  $\beta$  carbon in  $\text{CH}_2\text{CHCHO}$ .

| mulliken charge distribution                 | Q (carbonyl C) | Q (vinyl- $\beta$ C) |
|----------------------------------------------|----------------|----------------------|
| <i>anti_Syn</i> - $\text{CH}_2\text{CHCHO}$  | 0.14           | -0.238               |
| <i>anti_Anti</i> - $\text{CH}_2\text{CHCHO}$ | 0.113          | -0.238               |
| <i>syn_Syn</i> - $\text{CH}_2\text{CHCHO}$   | 0.058          | -0.214               |
| <i>syn_Anti</i> - $\text{CH}_2\text{CHCHO}$  | 0.111          | -0.252               |

Here we list all the reaction rate coefficients studied in this work (by method 3 discussed in the main text). The unit is  $\text{cm}^3\text{s}^{-1}$ .

**Table S4** The rate coefficients calculated in this work, in  $\text{cm}^3 \text{s}^{-1}$ .

(a)  $\text{CH}_2\text{OO}$

| T(K)   | $\text{CH}_2\text{OO}$ |                          |                      |                          |
|--------|------------------------|--------------------------|----------------------|--------------------------|
|        | $\text{H}_2\text{O}$   | $(\text{H}_2\text{O})_2$ | $\text{D}_2\text{O}$ | $(\text{D}_2\text{O})_2$ |
| 223.15 | 1.19E-16               | 2.04E-10                 | 9.77E-17             | 1.49E-10                 |
| 228.15 | 1.33E-16               | 1.42E-10                 | 1.08E-16             | 1.02E-10                 |
| 233.15 | 1.47E-16               | 9.98E-11                 | 1.18E-16             | 7.08E-11                 |
| 238.15 | 1.63E-16               | 7.13E-11                 | 1.30E-16             | 4.99E-11                 |
| 243.15 | 1.79E-16               | 5.16E-11                 | 1.41E-16             | 3.56E-11                 |
| 248.15 | 1.96E-16               | 3.78E-11                 | 1.54E-16             | 2.58E-11                 |
| 253.15 | 2.15E-16               | 2.80E-11                 | 1.67E-16             | 1.89E-11                 |
| 258.15 | 2.34E-16               | 2.10E-11                 | 1.81E-16             | 1.40E-11                 |
| 263.15 | 2.55E-16               | 1.59E-11                 | 1.95E-16             | 1.04E-11                 |
| 268.15 | 2.76E-16               | 1.21E-11                 | 2.10E-16             | 7.90E-12                 |
| 273.15 | 2.98E-16               | 9.38E-12                 | 2.26E-16             | 6.04E-12                 |
| 278.15 | 3.22E-16               | 7.30E-12                 | 2.42E-16             | 4.65E-12                 |
| 283.15 | 3.46E-16               | 5.73E-12                 | 2.59E-16             | 3.62E-12                 |
| 288.15 | 3.72E-16               | 4.54E-12                 | 2.77E-16             | 2.84E-12                 |
| 293.15 | 3.98E-16               | 3.62E-12                 | 2.96E-16             | 2.24E-12                 |
| 298.15 | 4.26E-16               | 2.91E-12                 | 3.15E-16             | 1.79E-12                 |
| 303.15 | 4.54E-16               | 2.35E-12                 | 3.35E-16             | 1.43E-12                 |

|        |          |          |          |          |
|--------|----------|----------|----------|----------|
| 308.15 | 4.84E-16 | 1.92E-12 | 3.55E-16 | 1.16E-12 |
| 313.15 | 5.15E-16 | 1.57E-12 | 3.77E-16 | 9.42E-13 |
| 318.15 | 5.47E-16 | 1.30E-12 | 3.99E-16 | 7.71E-13 |
| 323.15 | 5.80E-16 | 1.08E-12 | 4.22E-16 | 6.35E-13 |

(b) CH<sub>3</sub>CHOO and (CH<sub>3</sub>)<sub>2</sub>COO

| T(K)   | <i>anti</i> -CH <sub>3</sub> CHOO |                                 | <i>syn</i> -CH <sub>3</sub> CHOO |                                 | (CH <sub>3</sub> ) <sub>2</sub> COO |                                 |
|--------|-----------------------------------|---------------------------------|----------------------------------|---------------------------------|-------------------------------------|---------------------------------|
|        | H <sub>2</sub> O                  | (H <sub>2</sub> O) <sub>2</sub> | H <sub>2</sub> O                 | (H <sub>2</sub> O) <sub>2</sub> | H <sub>2</sub> O                    | (H <sub>2</sub> O) <sub>2</sub> |
| 223.15 | 3.08E-14                          | 1.21E-09                        | 6.13E-21                         | 1.08E-13                        | 3.78E-19                            | 1.31E-13                        |
| 228.15 | 2.99E-14                          | 7.85E-10                        | 8.29E-21                         | 8.48E-14                        | 4.57E-19                            | 9.58E-14                        |
| 233.15 | 2.91E-14                          | 5.18E-10                        | 1.11E-20                         | 6.74E-14                        | 5.51E-19                            | 7.16E-14                        |
| 238.15 | 2.84E-14                          | 3.48E-10                        | 1.46E-20                         | 5.41E-14                        | 6.60E-19                            | 5.43E-14                        |
| 243.15 | 2.78E-14                          | 2.37E-10                        | 1.91E-20                         | 4.38E-14                        | 7.86E-19                            | 4.19E-14                        |
| 248.15 | 2.72E-14                          | 1.64E-10                        | 2.47E-20                         | 3.58E-14                        | 9.33E-19                            | 3.27E-14                        |
| 253.15 | 2.67E-14                          | 1.15E-10                        | 3.17E-20                         | 2.95E-14                        | 1.10E-18                            | 2.59E-14                        |
| 258.15 | 2.63E-14                          | 8.19E-11                        | 4.03E-20                         | 2.45E-14                        | 1.29E-18                            | 2.07E-14                        |
| 263.15 | 2.59E-14                          | 5.90E-11                        | 5.08E-20                         | 2.05E-14                        | 1.51E-18                            | 1.68E-14                        |
| 268.15 | 2.55E-14                          | 4.30E-11                        | 6.35E-20                         | 1.72E-14                        | 1.76E-18                            | 1.37E-14                        |
| 273.15 | 2.51E-14                          | 3.17E-11                        | 7.88E-20                         | 1.46E-14                        | 2.04E-18                            | 1.13E-14                        |
| 278.15 | 2.48E-14                          | 2.36E-11                        | 9.71E-20                         | 1.24E-14                        | 2.36E-18                            | 9.40E-15                        |
| 283.15 | 2.45E-14                          | 1.78E-11                        | 1.19E-19                         | 1.07E-14                        | 2.71E-18                            | 7.88E-15                        |
| 288.15 | 2.43E-14                          | 1.36E-11                        | 1.45E-19                         | 9.19E-15                        | 3.11E-18                            | 6.65E-15                        |
| 293.15 | 2.41E-14                          | 1.04E-11                        | 1.75E-19                         | 7.97E-15                        | 3.55E-18                            | 5.66E-15                        |
| 298.15 | 2.38E-14                          | 8.07E-12                        | 2.10E-19                         | 6.94E-15                        | 4.04E-18                            | 4.84E-15                        |
| 303.15 | 2.37E-14                          | 6.30E-12                        | 2.51E-19                         | 6.08E-15                        | 4.58E-18                            | 4.17E-15                        |
| 308.15 | 2.35E-14                          | 4.96E-12                        | 2.98E-19                         | 5.34E-15                        | 5.18E-18                            | 3.61E-15                        |
| 313.15 | 2.33E-14                          | 3.94E-12                        | 3.53E-19                         | 4.72E-15                        | 5.84E-18                            | 3.15E-15                        |
| 318.15 | 2.32E-14                          | 3.15E-12                        | 4.15E-19                         | 4.18E-15                        | 6.56E-18                            | 2.76E-15                        |
| 323.15 | 2.31E-14                          | 2.54E-12                        | 4.87E-19                         | 3.72E-15                        | 7.35E-18                            | 2.43E-15                        |

(c) *anti*-CH<sub>3</sub>CH<sub>2</sub>CHOO

| T(K)   | <i>anti_Syn</i> -CH <sub>3</sub> CH <sub>2</sub> CHOO |                                 | <i>anti_Gauche</i> -CH <sub>3</sub> CH <sub>2</sub> CHOO |                                 |
|--------|-------------------------------------------------------|---------------------------------|----------------------------------------------------------|---------------------------------|
|        | H <sub>2</sub> O                                      | (H <sub>2</sub> O) <sub>2</sub> | H <sub>2</sub> O                                         | (H <sub>2</sub> O) <sub>2</sub> |
| 223.15 | 7.00E-14                                              | 2.19E-09                        | 3.48E-14                                                 | 1.73E-09                        |
| 228.15 | 6.67E-14                                              | 1.38E-09                        | 3.37E-14                                                 | 1.10E-09                        |
| 233.15 | 6.37E-14                                              | 8.94E-10                        | 3.27E-14                                                 | 7.18E-10                        |
| 238.15 | 6.11E-14                                              | 5.88E-10                        | 3.19E-14                                                 | 4.76E-10                        |
| 243.15 | 5.87E-14                                              | 3.93E-10                        | 3.11E-14                                                 | 3.20E-10                        |
| 248.15 | 5.65E-14                                              | 2.67E-10                        | 3.04E-14                                                 | 2.19E-10                        |
| 253.15 | 5.46E-14                                              | 1.85E-10                        | 2.98E-14                                                 | 1.52E-10                        |
| 258.15 | 5.29E-14                                              | 1.29E-10                        | 2.92E-14                                                 | 1.07E-10                        |
| 263.15 | 5.13E-14                                              | 9.19E-11                        | 2.86E-14                                                 | 7.63E-11                        |
| 268.15 | 4.98E-14                                              | 6.61E-11                        | 2.82E-14                                                 | 5.51E-11                        |
| 273.15 | 4.85E-14                                              | 4.81E-11                        | 2.77E-14                                                 | 4.03E-11                        |
| 278.15 | 4.73E-14                                              | 3.54E-11                        | 2.73E-14                                                 | 2.98E-11                        |

|        |          |          |          |          |
|--------|----------|----------|----------|----------|
| 283.15 | 4.62E-14 | 2.64E-11 | 2.69E-14 | 2.22E-11 |
| 288.15 | 4.52E-14 | 1.99E-11 | 2.66E-14 | 1.68E-11 |
| 293.15 | 4.42E-14 | 1.51E-11 | 2.63E-14 | 1.28E-11 |
| 298.15 | 4.33E-14 | 1.16E-11 | 2.60E-14 | 9.83E-12 |
| 303.15 | 4.25E-14 | 8.96E-12 | 2.58E-14 | 7.62E-12 |
| 308.15 | 4.18E-14 | 6.99E-12 | 2.55E-14 | 5.96E-12 |
| 313.15 | 4.11E-14 | 5.51E-12 | 2.53E-14 | 4.70E-12 |
| 318.15 | 4.05E-14 | 4.37E-12 | 2.51E-14 | 3.73E-12 |
| 323.15 | 3.99E-14 | 3.49E-12 | 2.49E-14 | 2.99E-12 |

(d) *syn*-CH<sub>3</sub>CH<sub>2</sub>CHOO

| T(K)   | <i>syn_Anti</i> -CH <sub>3</sub> CH <sub>2</sub> CHOO |                                 | <i>syn_Gauche</i> -CH <sub>3</sub> CH <sub>2</sub> CHOO |                                 |
|--------|-------------------------------------------------------|---------------------------------|---------------------------------------------------------|---------------------------------|
|        | H <sub>2</sub> O                                      | (H <sub>2</sub> O) <sub>2</sub> | H <sub>2</sub> O                                        | (H <sub>2</sub> O) <sub>2</sub> |
| 223.15 | 1.39E-20                                              | 3.01E-13                        | 7.89E-21                                                | 1.16E-12                        |
| 228.15 | 1.83E-20                                              | 2.28E-13                        | 1.05E-20                                                | 8.54E-13                        |
| 233.15 | 2.38E-20                                              | 1.75E-13                        | 1.38E-20                                                | 6.38E-13                        |
| 238.15 | 3.07E-20                                              | 1.36E-13                        | 1.79E-20                                                | 4.83E-13                        |
| 243.15 | 3.92E-20                                              | 1.07E-13                        | 2.30E-20                                                | 3.70E-13                        |
| 248.15 | 4.96E-20                                              | 8.46E-14                        | 2.94E-20                                                | 2.86E-13                        |
| 253.15 | 6.22E-20                                              | 6.77E-14                        | 3.71E-20                                                | 2.23E-13                        |
| 258.15 | 7.74E-20                                              | 5.47E-14                        | 4.66E-20                                                | 1.76E-13                        |
| 263.15 | 9.56E-20                                              | 4.46E-14                        | 5.80E-20                                                | 1.40E-13                        |
| 268.15 | 1.17E-19                                              | 3.66E-14                        | 7.16E-20                                                | 1.12E-13                        |
| 273.15 | 1.43E-19                                              | 3.03E-14                        | 8.77E-20                                                | 9.10E-14                        |
| 278.15 | 1.73E-19                                              | 2.53E-14                        | 1.07E-19                                                | 7.42E-14                        |
| 283.15 | 2.08E-19                                              | 2.12E-14                        | 1.29E-19                                                | 6.09E-14                        |
| 288.15 | 2.48E-19                                              | 1.79E-14                        | 1.56E-19                                                | 5.04E-14                        |
| 293.15 | 2.95E-19                                              | 1.52E-14                        | 1.86E-19                                                | 4.19E-14                        |
| 298.15 | 3.49E-19                                              | 1.30E-14                        | 2.22E-19                                                | 3.51E-14                        |
| 303.15 | 4.11E-19                                              | 1.12E-14                        | 2.63E-19                                                | 2.96E-14                        |
| 308.15 | 4.82E-19                                              | 9.66E-15                        | 3.09E-19                                                | 2.51E-14                        |
| 313.15 | 5.62E-19                                              | 8.39E-15                        | 3.63E-19                                                | 2.14E-14                        |
| 318.15 | 6.52E-19                                              | 7.32E-15                        | 4.24E-19                                                | 1.83E-14                        |
| 323.15 | 7.55E-19                                              | 6.42E-15                        | 4.93E-19                                                | 1.58E-14                        |

(e) *anti\_Anti*-CH<sub>2</sub>CHCHOO

| T(K)   | <i>anti_Anti</i> -CH <sub>2</sub> CHCHOO |                                 |                       |                                      |
|--------|------------------------------------------|---------------------------------|-----------------------|--------------------------------------|
|        | H <sub>2</sub> O                         | (H <sub>2</sub> O) <sub>2</sub> | H <sub>2</sub> O (VI) | (H <sub>2</sub> O) <sub>2</sub> (VI) |
| 223.15 | 3.14E-17                                 | 7.42E-14                        | 1.63E-45              | 7.78E-28                             |
| 228.15 | 3.36E-17                                 | 5.79E-14                        | 7.74E-45              | 1.22E-27                             |
| 233.15 | 3.62E-17                                 | 4.58E-14                        | 3.44E-44              | 1.89E-27                             |
| 238.15 | 3.90E-17                                 | 3.67E-14                        | 1.43E-43              | 2.86E-27                             |
| 243.15 | 4.21E-17                                 | 2.97E-14                        | 5.65E-43              | 4.28E-27                             |
| 248.15 | 4.55E-17                                 | 2.43E-14                        | 2.10E-42              | 6.30E-27                             |
| 253.15 | 4.92E-17                                 | 2.01E-14                        | 7.44E-42              | 9.13E-27                             |



|        |          |          |          |          |
|--------|----------|----------|----------|----------|
| 258.15 | 5.32E-17 | 1.67E-14 | 2.51E-41 | 1.31E-26 |
| 263.15 | 5.75E-17 | 1.41E-14 | 8.08E-41 | 1.85E-26 |
| 268.15 | 6.22E-17 | 1.19E-14 | 2.49E-40 | 2.58E-26 |
| 273.15 | 6.72E-17 | 1.02E-14 | 7.37E-40 | 3.56E-26 |
| 278.15 | 7.25E-17 | 8.73E-15 | 2.10E-39 | 4.85E-26 |
| 283.15 | 7.82E-17 | 7.55E-15 | 5.77E-39 | 6.55E-26 |
| 288.15 | 8.43E-17 | 6.56E-15 | 1.53E-38 | 8.76E-26 |
| 293.15 | 9.07E-17 | 5.73E-15 | 3.92E-38 | 1.16E-25 |
| 298.15 | 9.76E-17 | 5.04E-15 | 9.76E-38 | 1.52E-25 |
| 303.15 | 1.05E-16 | 4.45E-15 | 2.36E-37 | 1.98E-25 |
| 308.15 | 1.13E-16 | 3.95E-15 | 5.53E-37 | 2.56E-25 |
| 313.15 | 1.21E-16 | 3.52E-15 | 1.26E-36 | 3.28E-25 |
| 318.15 | 1.29E-16 | 3.15E-15 | 2.81E-36 | 4.16E-25 |
| 323.15 | 1.38E-16 | 2.83E-15 | 6.11E-36 | 5.26E-25 |

(f) *anti\_Syn*-CH<sub>2</sub>CHCHO

| T(K)   | <i>anti_Syn</i> -CH <sub>2</sub> CHCHO |                                 |                                      |
|--------|----------------------------------------|---------------------------------|--------------------------------------|
|        | H <sub>2</sub> O                       | (H <sub>2</sub> O) <sub>2</sub> | (H <sub>2</sub> O) <sub>2</sub> (VI) |
| 223.15 | 1.29E-16                               | 1.91E-12                        | 3.02E-24                             |
| 228.15 | 1.37E-16                               | 1.40E-12                        | 4.09E-24                             |
| 233.15 | 1.47E-16                               | 1.05E-12                        | 5.46E-24                             |
| 238.15 | 1.57E-16                               | 7.88E-13                        | 7.19E-24                             |
| 243.15 | 1.67E-16                               | 6.01E-13                        | 9.37E-24                             |
| 248.15 | 1.79E-16                               | 4.64E-13                        | 1.21E-23                             |
| 253.15 | 1.91E-16                               | 3.62E-13                        | 1.54E-23                             |
| 258.15 | 2.03E-16                               | 2.85E-13                        | 1.94E-23                             |
| 263.15 | 2.16E-16                               | 2.26E-13                        | 2.43E-23                             |
| 268.15 | 2.30E-16                               | 1.82E-13                        | 3.01E-23                             |
| 273.15 | 2.44E-16                               | 1.47E-13                        | 3.70E-23                             |
| 278.15 | 2.60E-16                               | 1.20E-13                        | 4.52E-23                             |
| 283.15 | 2.75E-16                               | 9.84E-14                        | 5.48E-23                             |
| 288.15 | 2.92E-16                               | 8.13E-14                        | 6.59E-23                             |
| 293.15 | 3.09E-16                               | 6.77E-14                        | 7.88E-23                             |
| 298.15 | 3.26E-16                               | 5.68E-14                        | 9.37E-23                             |
| 303.15 | 3.45E-16                               | 4.79E-14                        | 1.11E-22                             |
| 308.15 | 3.64E-16                               | 4.06E-14                        | 1.30E-22                             |
| 313.15 | 3.84E-16                               | 3.47E-14                        | 1.52E-22                             |
| 318.15 | 4.04E-16                               | 2.97E-14                        | 1.77E-22                             |
| 323.15 | 4.25E-16                               | 2.56E-14                        | 2.06E-22                             |

(g) *syn\_Anti*-CH<sub>2</sub>CHCHO

| T(K)   | <i>syn_Anti</i> -CH <sub>2</sub> CHCHO |                                 |                      |                                      |
|--------|----------------------------------------|---------------------------------|----------------------|--------------------------------------|
|        | H <sub>2</sub> O                       | (H <sub>2</sub> O) <sub>2</sub> | H <sub>2</sub> O(VI) | (H <sub>2</sub> O) <sub>2</sub> (VI) |
| 223.15 | 2.04E-21                               | 1.24E-15                        | 7.13E-40             | 1.79E-23                             |
| 228.15 | 2.78E-21                               | 1.04E-15                        | 2.47E-39             | 1.90E-23                             |

|        |          |          |          |          |
|--------|----------|----------|----------|----------|
| 233.15 | 3.77E-21 | 8.86E-16 | 8.16E-39 | 2.04E-23 |
| 238.15 | 5.04E-21 | 7.60E-16 | 2.56E-38 | 2.22E-23 |
| 243.15 | 6.69E-21 | 6.57E-16 | 7.68E-38 | 2.44E-23 |
| 248.15 | 8.80E-21 | 5.73E-16 | 2.20E-37 | 2.70E-23 |
| 253.15 | 1.15E-20 | 5.03E-16 | 6.08E-37 | 3.00E-23 |
| 258.15 | 1.48E-20 | 4.45E-16 | 1.62E-36 | 3.36E-23 |
| 263.15 | 1.89E-20 | 3.95E-16 | 4.14E-36 | 3.77E-23 |
| 268.15 | 2.41E-20 | 3.54E-16 | 1.02E-35 | 4.24E-23 |
| 273.15 | 3.04E-20 | 3.18E-16 | 2.45E-35 | 4.77E-23 |
| 278.15 | 3.80E-20 | 2.87E-16 | 5.70E-35 | 5.37E-23 |
| 283.15 | 4.73E-20 | 2.61E-16 | 1.29E-34 | 6.06E-23 |
| 288.15 | 5.84E-20 | 2.38E-16 | 2.83E-34 | 6.83E-23 |
| 293.15 | 7.17E-20 | 2.18E-16 | 6.05E-34 | 7.69E-23 |
| 298.15 | 8.75E-20 | 2.00E-16 | 1.26E-33 | 8.65E-23 |
| 303.15 | 1.06E-19 | 1.85E-16 | 2.57E-33 | 9.72E-23 |
| 308.15 | 1.28E-19 | 1.71E-16 | 5.13E-33 | 1.09E-22 |
| 313.15 | 1.54E-19 | 1.59E-16 | 1.00E-32 | 1.22E-22 |
| 318.15 | 1.84E-19 | 1.48E-16 | 1.91E-32 | 1.37E-22 |
| 323.15 | 2.18E-19 | 1.38E-16 | 3.58E-32 | 1.53E-22 |

(h) *syn\_Syn*-CH<sub>2</sub>CHCHO

| T(K)   | <i>syn_Syn</i> -CH <sub>2</sub> CHCHO |                                 |                      |                                      |
|--------|---------------------------------------|---------------------------------|----------------------|--------------------------------------|
|        | H <sub>2</sub> O                      | (H <sub>2</sub> O) <sub>2</sub> | H <sub>2</sub> O(VI) | (H <sub>2</sub> O) <sub>2</sub> (VI) |
| 223.15 | 4.83E-24                              | 6.22E-18                        | 4.19E-23             | 1.25E-20                             |
| 228.15 | 7.71E-24                              | 5.86E-18                        | 6.41E-23             | 1.42E-20                             |
| 233.15 | 1.21E-23                              | 5.57E-18                        | 9.65E-23             | 1.61E-20                             |
| 238.15 | 1.87E-23                              | 5.32E-18                        | 1.43E-22             | 1.80E-20                             |
| 243.15 | 2.83E-23                              | 5.11E-18                        | 2.08E-22             | 2.02E-20                             |
| 248.15 | 4.23E-23                              | 4.93E-18                        | 2.98E-22             | 2.24E-20                             |
| 253.15 | 6.23E-23                              | 4.78E-18                        | 4.22E-22             | 2.47E-20                             |
| 258.15 | 9.05E-23                              | 4.64E-18                        | 5.90E-22             | 2.72E-20                             |
| 263.15 | 1.30E-22                              | 4.53E-18                        | 8.14E-22             | 2.98E-20                             |
| 268.15 | 1.84E-22                              | 4.43E-18                        | 1.11E-21             | 3.26E-20                             |
| 273.15 | 2.57E-22                              | 4.34E-18                        | 1.50E-21             | 3.55E-20                             |
| 278.15 | 3.56E-22                              | 4.26E-18                        | 2.00E-21             | 3.85E-20                             |
| 283.15 | 4.88E-22                              | 4.19E-18                        | 2.64E-21             | 4.16E-20                             |
| 288.15 | 6.62E-22                              | 4.13E-18                        | 3.46E-21             | 4.49E-20                             |
| 293.15 | 8.89E-22                              | 4.08E-18                        | 4.48E-21             | 4.82E-20                             |
| 298.15 | 1.18E-21                              | 4.04E-18                        | 5.77E-21             | 5.18E-20                             |
| 303.15 | 1.56E-21                              | 4.00E-18                        | 7.37E-21             | 5.54E-20                             |
| 308.15 | 2.04E-21                              | 3.96E-18                        | 9.33E-21             | 5.92E-20                             |
| 313.15 | 2.65E-21                              | 3.93E-18                        | 1.17E-20             | 6.31E-20                             |
| 318.15 | 3.42E-21                              | 3.91E-18                        | 1.47E-20             | 6.71E-20                             |
| 323.15 | 4.37E-21                              | 3.89E-18                        | 1.82E-20             | 7.12E-20                             |

(i) CHCCHO

| T(K)   | <i>anti</i> -CHCCHO |                                 | <i>syn</i> -CHCCHO |                                 |
|--------|---------------------|---------------------------------|--------------------|---------------------------------|
|        | H <sub>2</sub> O    | (H <sub>2</sub> O) <sub>2</sub> | H <sub>2</sub> O   | (H <sub>2</sub> O) <sub>2</sub> |
| 223.15 | 3.34E-18            | 4.29E-14                        | 1.04E-22           | 2.23E-16                        |
| 228.15 | 3.89E-18            | 3.48E-14                        | 1.53E-22           | 1.99E-16                        |
| 233.15 | 4.51E-18            | 2.85E-14                        | 2.23E-22           | 1.79E-16                        |
| 238.15 | 5.21E-18            | 2.35E-14                        | 3.19E-22           | 1.62E-16                        |
| 243.15 | 5.99E-18            | 1.96E-14                        | 4.51E-22           | 1.47E-16                        |
| 248.15 | 6.86E-18            | 1.64E-14                        | 6.29E-22           | 1.34E-16                        |
| 253.15 | 7.83E-18            | 1.39E-14                        | 8.68E-22           | 1.22E-16                        |
| 258.15 | 8.91E-18            | 1.18E-14                        | 1.18E-21           | 1.13E-16                        |
| 263.15 | 1.01E-17            | 1.01E-14                        | 1.60E-21           | 1.04E-16                        |
| 268.15 | 1.14E-17            | 8.65E-15                        | 2.13E-21           | 9.60E-17                        |
| 273.15 | 1.28E-17            | 7.47E-15                        | 2.82E-21           | 8.90E-17                        |
| 278.15 | 1.44E-17            | 6.49E-15                        | 3.69E-21           | 8.29E-17                        |
| 283.15 | 1.61E-17            | 5.67E-15                        | 4.79E-21           | 7.74E-17                        |
| 288.15 | 1.79E-17            | 4.97E-15                        | 6.17E-21           | 7.25E-17                        |
| 293.15 | 2.00E-17            | 4.38E-15                        | 7.88E-21           | 6.80E-17                        |
| 298.15 | 2.21E-17            | 3.88E-15                        | 9.99E-21           | 6.40E-17                        |
| 303.15 | 2.45E-17            | 3.45E-15                        | 1.26E-20           | 6.04E-17                        |
| 308.15 | 2.70E-17            | 3.08E-15                        | 1.57E-20           | 5.71E-17                        |
| 313.15 | 2.97E-17            | 2.76E-15                        | 1.95E-20           | 5.41E-17                        |
| 318.15 | 3.26E-17            | 2.48E-15                        | 2.41E-20           | 5.14E-17                        |
| 323.15 | 3.57E-17            | 2.24E-15                        | 2.95E-20           | 4.89E-17                        |

Here we listed the variational effect of lowest channel for each CI reaction with water monomer and water dimer.

**Table S5** variational effect of lowest channel for each CI reaction with water monomer and water dimer.

| <i>anti</i> -type CIs                                                                      | 223.15 | 243.15 | 263.15 | 283.15 | 298.15 | 313.15 | 323.15 |
|--------------------------------------------------------------------------------------------|--------|--------|--------|--------|--------|--------|--------|
| CH <sub>2</sub> OO + H <sub>2</sub> O                                                      | 0.77   | 0.79   | 0.81   | 0.83   | 0.84   | 0.86   | 0.86   |
| CH <sub>2</sub> OO + (H <sub>2</sub> O) <sub>2</sub>                                       | 0.68   | 0.72   | 0.75   | 0.78   | 0.81   | 0.83   | 0.84   |
| <i>anti</i> -CH <sub>3</sub> CHOO + H <sub>2</sub> O                                       | 0.50   | 0.53   | 0.56   | 0.58   | 0.60   | 0.62   | 0.63   |
| <i>anti</i> -CH <sub>3</sub> CHOO + (H <sub>2</sub> O) <sub>2</sub>                        | 0.37   | 0.43   | 0.47   | 0.52   | 0.55   | 0.58   | 0.60   |
| <i>anti_Syn</i> -CH <sub>3</sub> CH <sub>2</sub> CHOO + H <sub>2</sub> O                   | 0.51   | 0.55   | 0.58   | 0.61   | 0.63   | 0.65   | 0.66   |
| <i>anti_Syn</i> -CH <sub>3</sub> CH <sub>2</sub> CHOO + (H <sub>2</sub> O) <sub>2</sub>    | 0.37   | 0.43   | 0.47   | 0.52   | 0.56   | 0.59   | 0.61   |
| <i>anti_Gauche</i> -CH <sub>3</sub> CH <sub>2</sub> CHOO + H <sub>2</sub> O                | 0.52   | 0.56   | 0.59   | 0.62   | 0.64   | 0.66   | 0.68   |
| <i>anti_Gauche</i> -CH <sub>3</sub> CH <sub>2</sub> CHOO + (H <sub>2</sub> O) <sub>2</sub> | 0.40   | 0.46   | 0.51   | 0.56   | 0.59   | 0.62   | 0.65   |
| <i>anti_Syn</i> -CH <sub>2</sub> CHCHOO + H <sub>2</sub> O                                 | 0.44   | 0.48   | 0.51   | 0.54   | 0.56   | 0.58   | 0.59   |
| <i>anti_Syn</i> -CH <sub>2</sub> CHCHOO + (H <sub>2</sub> O) <sub>2</sub>                  | 0.38   | 0.44   | 0.49   | 0.55   | 0.58   | 0.61   | 0.63   |
| <i>anti_Anti</i> -CH <sub>2</sub> CHCHOO + H <sub>2</sub> O                                | 0.42   | 0.46   | 0.48   | 0.51   | 0.53   | 0.54   | 0.55   |
| <i>anti_Anti</i> -CH <sub>2</sub> CHCHOO + (H <sub>2</sub> O) <sub>2</sub>                 | 0.47   | 0.52   | 0.57   | 0.61   | 0.64   | 0.67   | 0.69   |
| <i>anti</i> -CHCCHO + H <sub>2</sub> O                                                     | 0.46   | 0.49   | 0.52   | 0.55   | 0.56   | 0.58   | 0.59   |
| <i>anti</i> -CHCCHO + (H <sub>2</sub> O) <sub>2</sub>                                      | 0.45   | 0.51   | 0.56   | 0.60   | 0.63   | 0.66   | 0.68   |

| <b>syn-type CIs</b>                                                                       | 223.15 | 243.15 | 263.15 | 283.15 | 298.15 | 313.15 | 323.15 |
|-------------------------------------------------------------------------------------------|--------|--------|--------|--------|--------|--------|--------|
| <i>syn</i> -CH <sub>3</sub> CHOO + H <sub>2</sub> O                                       | 0.63   | 0.66   | 0.68   | 0.71   | 0.72   | 0.74   | 0.75   |
| <i>syn</i> -CH <sub>3</sub> CHOO + (H <sub>2</sub> O) <sub>2</sub>                        | 0.30   | 0.35   | 0.39   | 0.44   | 0.47   | 0.50   | 0.52   |
| (CH <sub>3</sub> ) <sub>2</sub> COO + H <sub>2</sub> O                                    | 0.43   | 0.46   | 0.49   | 0.52   | 0.54   | 0.55   | 0.57   |
| (CH <sub>3</sub> ) <sub>2</sub> COO + (H <sub>2</sub> O) <sub>2</sub>                     | 0.55   | 0.60   | 0.64   | 0.68   | 0.71   | 0.73   | 0.75   |
| <i>syn</i> _Anti-CH <sub>3</sub> CH <sub>2</sub> CHOO + H <sub>2</sub> O                  | 0.61   | 0.64   | 0.66   | 0.69   | 0.71   | 0.72   | 0.73   |
| <i>syn</i> _Anti-CH <sub>3</sub> CH <sub>2</sub> CHOO + (H <sub>2</sub> O) <sub>2</sub>   | 0.37   | 0.42   | 0.47   | 0.52   | 0.55   | 0.58   | 0.60   |
| <i>syn</i> _Gauche-CH <sub>3</sub> CH <sub>2</sub> CHOO + H <sub>2</sub> O                | 0.69   | 0.72   | 0.75   | 0.77   | 0.79   | 0.80   | 0.81   |
| <i>syn</i> _Gauche-CH <sub>3</sub> CH <sub>2</sub> CHOO + (H <sub>2</sub> O) <sub>2</sub> | 0.34   | 0.40   | 0.45   | 0.49   | 0.52   | 0.55   | 0.57   |
| <i>syn</i> _Anti-CH <sub>2</sub> CHCHOO + H <sub>2</sub> O                                | 0.47   | 0.50   | 0.53   | 0.56   | 0.58   | 0.59   | 0.60   |
| <i>syn</i> _Anti-CH <sub>2</sub> CHCHOO + (H <sub>2</sub> O) <sub>2</sub>                 | 0.38   | 0.43   | 0.49   | 0.54   | 0.57   | 0.61   | 0.63   |
| <i>syn</i> _Syn-CH <sub>2</sub> CHCHOO + H <sub>2</sub> O                                 | 0.49   | 0.53   | 0.56   | 0.58   | 0.60   | 0.62   | 0.63   |
| <i>syn</i> _Syn-CH <sub>2</sub> CHCHOO + H <sub>2</sub> O VI                              | 0.83   | 0.85   | 0.87   | 0.88   | 0.89   | 0.90   | 0.91   |
| <i>syn</i> _Syn-CH <sub>2</sub> CHCHOO + (H <sub>2</sub> O) <sub>2</sub>                  | 0.52   | 0.57   | 0.62   | 0.66   | 0.69   | 0.72   | 0.74   |
| <i>syn</i> _Syn-CH <sub>2</sub> CHCHOO + (H <sub>2</sub> O) <sub>2</sub> VI               | 0.65   | 0.69   | 0.73   | 0.76   | 0.78   | 0.81   | 0.82   |
| <i>syn</i> -CHCCHOO + H <sub>2</sub> O                                                    | 0.57   | 0.60   | 0.63   | 0.65   | 0.67   | 0.69   | 0.70   |
| <i>syn</i> -CHCCHOO + (H <sub>2</sub> O) <sub>2</sub>                                     | 0.43   | 0.48   | 0.54   | 0.59   | 0.62   | 0.65   | 0.67   |

Below are the optimized geometries studied in this work for the Criegee Intermediates, vdW complex, transition states, obtained by B3LYP/6-311+G(2d,2p):

(CH<sub>3</sub>)<sub>2</sub>COO

|   |               |               |               |
|---|---------------|---------------|---------------|
| C | 0.4915324045  | 0.2547705759  | -0.0707839595 |
| O | -0.5232267129 | -0.4531589839 | -0.3365505655 |
| O | -1.7499466841 | 0.178684224   | -0.3752151478 |
| C | 1.793503328   | -0.4620343155 | -0.0385245882 |
| H | 2.4809212902  | -0.0260609355 | -0.7673730953 |
| H | 2.2595925393  | -0.3510771651 | 0.9434559432  |
| H | 1.6584511697  | -1.5181041133 | -0.2566239081 |
| C | 0.3280527869  | 1.6974890144  | 0.1821469195  |
| H | -0.1604109552 | 2.1561724214  | -0.6817109205 |
| H | -0.3785926866 | 1.8357770679  | 1.004804961   |
| H | 1.2787893203  | 2.1776861495  | 0.3963674251  |

(CH<sub>3</sub>)<sub>2</sub>COO 1a TS

|   |               |               |               |
|---|---------------|---------------|---------------|
| C | 0.9965631246  | 0.2715181363  | 0.1060298781  |
| O | -0.0832568631 | -0.3676318641 | -0.2221930876 |
| O | -1.2392257251 | 0.441689734   | 0.1375611824  |
| O | 0.3772596216  | 1.9059634737  | -0.8612792224 |
| H | -0.5779257766 | 1.4671801616  | -0.4699875852 |
| H | 0.5414082641  | 2.7154943912  | -0.3682567999 |
| C | 1.1597981892  | 0.8705369882  | 1.4703950614  |
| H | 1.5362576476  | 0.0757558512  | 2.1219363302  |

|   |              |               |               |
|---|--------------|---------------|---------------|
| H | 1.8995541182 | 1.6675355391  | 1.4630367136  |
| H | 0.2108783164 | 1.2205900168  | 1.8586238795  |
| C | 2.2117115939 | -0.198972864  | -0.6238088042 |
| H | 2.9323215921 | 0.6118152673  | -0.7014521803 |
| H | 2.6761681887 | -1.0120989875 | -0.0614561647 |
| H | 1.9471667085 | -0.5513548438 | -1.6159602009 |

(CH<sub>3</sub>)<sub>2</sub>COO 1a vdW

|   |               |               |               |
|---|---------------|---------------|---------------|
| C | 0.6203545273  | -0.6538724674 | 0.2437443888  |
| O | -0.4755600587 | -0.8757416332 | -0.3441288326 |
| O | -1.5891805513 | -0.1360891022 | 0.0632509265  |
| O | -0.6459746903 | 2.274834087   | -0.8333574772 |
| H | -1.1659633457 | 1.4803478974  | -0.5822009361 |
| H | -1.1554689441 | 2.7273437865  | -1.508648706  |
| C | 0.7134495065  | 0.3293782298  | 1.3366308559  |
| H | 1.6716571868  | 0.2612555591  | 1.8442378106  |
| H | 0.578415832   | 1.3332992866  | 0.9209001092  |
| H | -0.122106558  | 0.1783306238  | 2.0222794346  |
| C | 1.7768607207  | -1.4460399549 | -0.2494868096 |
| H | 2.559234255   | -0.7676075213 | -0.5972905418 |
| H | 2.2021130958  | -2.0311463171 | 0.5686979073  |
| H | 1.481716024   | -2.1068674741 | -1.0596561298 |

(CH<sub>3</sub>)<sub>2</sub>COO 1b TS

|   |               |               |               |
|---|---------------|---------------|---------------|
| C | 0.9979375092  | 0.2393833138  | 0.0887668924  |
| O | -0.0798590155 | -0.4051488882 | -0.2438580313 |
| O | -1.2377653765 | 0.405598612   | 0.1010435681  |
| O | 0.3866484401  | 1.947906143   | -0.7695342829 |
| H | -0.5678332937 | 1.4602552752  | -0.4302558469 |
| H | 0.4140122857  | 1.8332411405  | -1.7259315923 |
| C | 1.1520828885  | 0.8727944525  | 1.4355054226  |
| H | 1.5301147571  | 0.0969706984  | 2.1083038578  |
| H | 1.8775063414  | 1.6799877281  | 1.3973328971  |
| H | 0.2022145173  | 1.2344904726  | 1.8087792714  |
| C | 2.2243816892  | -0.2440185793 | -0.6165279563 |
| H | 2.9104445095  | 0.5873969808  | -0.7649003595 |
| H | 2.7295797588  | -0.9844219186 | 0.0070849933  |
| H | 1.9730319889  | -0.6964174308 | -1.5719228336 |

(CH<sub>3</sub>)<sub>2</sub>COO 1b vdW

|   |               |               |               |
|---|---------------|---------------|---------------|
| C | 0.6215014885  | -0.6487223022 | 0.2548323994  |
| O | -0.4673662885 | -0.8811436805 | -0.3419901933 |
| O | -1.5889604813 | -0.1446028495 | 0.0488138939  |
| O | -0.6502277088 | 2.2646225257  | -0.8570171171 |

|   |               |               |               |
|---|---------------|---------------|---------------|
| H | -1.1682936313 | 1.4691979476  | -0.6048609099 |
| H | -1.1555541001 | 2.7091447134  | -1.5406931206 |
| C | 0.6984917553  | 0.3433269354  | 1.3410001307  |
| H | 1.6520365845  | 0.2843950305  | 1.8584425343  |
| H | 0.5620421325  | 1.3432865734  | 0.9162814366  |
| H | -0.1429050522 | 0.1928697423  | 2.0195995459  |
| C | 1.7871081326  | -1.4381911148 | -0.2209960266 |
| H | 2.5691231749  | -0.7580948287 | -0.5663479508 |
| H | 2.2075226131  | -2.0146728058 | 0.6057661249  |
| H | 1.5035413808  | -2.1068038868 | -1.0289097475 |

(CH<sub>3</sub>)<sub>2</sub>COO 2a TS

|   |               |               |               |
|---|---------------|---------------|---------------|
| C | 1.3129881236  | -0.3206357374 | -0.3192678942 |
| O | 1.7211912985  | 0.89979091    | -0.1423474213 |
| O | 2.8580348126  | 1.2796844156  | -0.9627732529 |
| O | 0.1965995431  | -0.2483529805 | -1.8851795815 |
| H | -0.6269847655 | 0.1784949404  | -1.6234245309 |
| H | 0.7438062508  | 0.5078827102  | -2.4826487533 |
| O | 1.5159676473  | 1.4953937631  | -2.9647187529 |
| H | 2.2426476968  | 1.480344905   | -2.0628464866 |
| H | 1.988208283   | 1.276822319   | -3.7711741144 |
| C | 2.2506477647  | -1.367787709  | -0.8319195617 |
| H | 3.034422949   | -1.4964240516 | -0.0824369514 |
| H | 1.7219225935  | -2.3055774783 | -0.9734300046 |
| H | 2.7273206338  | -1.0575285817 | -1.7533011861 |
| C | 0.2887403944  | -0.7104915887 | 0.708557576   |
| H | -0.3141443455 | -1.5404746327 | 0.3512177394  |
| H | 0.8135934506  | -1.0251630123 | 1.6123464894  |
| H | -0.3454563306 | 0.136040809   | 0.962372687   |

(CH<sub>3</sub>)<sub>2</sub>COO 2a vdW

|   |               |               |               |
|---|---------------|---------------|---------------|
| C | 0.1055415344  | -0.568471731  | 1.0561267501  |
| O | 0.4202363544  | 0.6454218313  | 0.9177470469  |
| O | 1.5115484148  | 0.9300202266  | 0.078535658   |
| O | -1.6291083991 | -0.5685521202 | -1.4495962519 |
| H | -2.4904353281 | -0.5038421616 | -1.8675454561 |
| H | -1.1233086457 | 0.2092088893  | -1.7685971526 |
| O | -0.0016835371 | 1.5888292095  | -2.061387353  |
| H | 0.6340390017  | 1.4614838634  | -1.311952601  |
| H | 0.5308380361  | 1.600692485   | -2.8599619636 |
| C | 0.87924232    | -1.630774616  | 0.3904091929  |
| H | 1.9421324994  | -1.4712421096 | 0.5767753479  |
| H | 0.5538160604  | -2.6145120784 | 0.7157943027  |
| H | 0.7378590979  | -1.5322611425 | -0.687884393  |

|   |               |               |              |
|---|---------------|---------------|--------------|
| C | -1.0773595181 | -0.8294626826 | 1.9113585183 |
| H | -1.8430994195 | -1.3001975004 | 1.2913615545 |
| H | -0.8172387035 | -1.5271073838 | 2.7094848947 |
| H | -1.4676637681 | 0.0924430211  | 2.3328239051 |

(CH<sub>3</sub>)<sub>2</sub>COO 2b TS

|   |               |                          |               |
|---|---------------|--------------------------|---------------|
| C | 1.9781981764  | -1.4222186 -0.6663815198 |               |
| O | 2.6876606283  | -0.347688947             | -0.509226418  |
| O | 4.0223916212  | -0.4241636834            | -1.0800688039 |
| O | 3.2287400945  | -0.0423560054            | -3.3280304413 |
| H | 3.1216608091  | 0.8866803468             | -3.5454820632 |
| H | 3.7147401556  | -0.1405798088            | -2.2812303427 |
| O | 1.2588600168  | -1.1651078561            | -2.4385514101 |
| H | 2.0941995671  | -0.6180595571            | -2.9356578098 |
| H | 1.1495030036  | -1.9990457822            | -2.9077013679 |
| C | 2.6526065051  | -2.7486436171            | -0.8381568064 |
| H | 3.1670036912  | -2.9747208134            | 0.0987668407  |
| H | 1.9172114352  | -3.5268773616            | -1.0289078925 |
| H | 3.4014912113  | -2.7154715915            | -1.6202181659 |
| C | 0.6916224586  | -1.3478318694            | 0.1012494354  |
| H | -0.0344030904 | -2.0498308085            | -0.2981612109 |
| H | 0.8963332647  | -1.6058963166            | 1.1422936304  |
| H | 0.2860324517  | -0.3411717287            | 0.0600313459  |

(CH<sub>3</sub>)<sub>2</sub>COO 2b vdW

|   |               |               |               |
|---|---------------|---------------|---------------|
| C | -0.2680407181 | -0.440065934  | 1.0815482317  |
| O | 0.3649330532  | 0.6428116273  | 0.9444789565  |
| O | 1.659242508   | 0.5578794013  | 0.3979314355  |
| O | 0.9282315591  | 1.1045831906  | -2.1340213159 |
| H | 0.9722595051  | 2.0491749337  | -2.2998800612 |
| H | 1.3064514385  | 0.9708754274  | -1.2270543742 |
| O | -1.4803221804 | -0.1866411578 | -1.6841801483 |
| H | -0.6844510065 | 0.3245543469  | -1.9446571595 |
| H | -1.8253386021 | -0.5559949359 | -2.4999084365 |
| C | 0.3531856019  | -1.7250037743 | 0.7157383715  |
| H | 1.3215473765  | -1.8067930301 | 1.2129454812  |
| H | -0.296283885  | -2.5595418238 | 0.962334355   |
| H | 0.5656793717  | -1.7134070893 | -0.3546411319 |
| C | -1.6469041078 | -0.3135963279 | 1.6106531337  |
| H | -2.3346940993 | -0.6148584258 | 0.8171017173  |
| H | -1.7898023423 | -0.9862571393 | 2.457625983   |
| H | -1.8628994727 | 0.710340711   | 1.9020199625  |

(CH<sub>3</sub>)<sub>2</sub>COO 2c TS

|   |               |               |               |
|---|---------------|---------------|---------------|
| C | 1.3409126528  | -0.3749608014 | -0.3461004904 |
| O | 1.7843052653  | 0.8386303675  | -0.2253917598 |
| O | 2.9109071211  | 1.1506173784  | -1.0888008953 |
| O | 0.2185678297  | -0.2441012398 | -1.8971524226 |
| H | 0.2821829951  | -1.0360767074 | -2.4405986609 |
| H | 0.6918392597  | 0.5957533368  | -2.4626090906 |
| O | 1.3881671136  | 1.6455998306  | -2.8981000705 |
| H | 2.2149439646  | 1.5090681279  | -2.0985896784 |
| H | 1.7649316066  | 1.5482099923  | -3.7753543731 |
| C | 2.2673457079  | -1.472581975  | -0.7740834548 |
| H | 2.9929816037  | -1.616357978  | 0.0298364222  |
| H | 1.7196192857  | -2.4014439547 | -0.9160797386 |
| H | 2.8191171854  | -1.197978363  | -1.664888929  |
| C | 0.2791724762  | -0.6720015216 | 0.6716822548  |
| H | -0.3173869495 | -1.5260080932 | 0.3646166083  |
| H | 0.7656025015  | -0.9036294264 | 1.62126934    |
| H | -0.3642476193 | 0.1926860267  | 0.8056929388  |

(CH<sub>3</sub>)<sub>2</sub>COO 2c vdW

|   |               |               |               |
|---|---------------|---------------|---------------|
| C | 0.1098422639  | -0.5654948743 | 1.0651192022  |
| O | 0.4094200595  | 0.6526680478  | 0.9307630094  |
| O | 1.4965772895  | 0.9536410263  | 0.0918703461  |
| O | -1.6263301515 | -0.5783386078 | -1.4395163903 |
| H | -2.4886619594 | -0.5228432133 | -1.8567178571 |
| H | -1.1303952898 | 0.2067197925  | -1.7561229786 |
| O | -0.026098574  | 1.6010999115  | -2.0448121777 |
| H | 0.6116468355  | 1.4790241397  | -1.2962190663 |
| H | 0.5057047294  | 1.6223100135  | -2.843671851  |
| C | 0.8961718751  | -1.6158395903 | 0.3952371679  |
| H | 1.9571321091  | -1.4438299717 | 0.5815019906  |
| H | 0.5831411012  | -2.6046461705 | 0.717402147   |
| H | 0.7528715854  | -1.5153427828 | -0.6826201948 |
| C | -1.0691774479 | -0.8440499251 | 1.9201701284  |
| H | -1.8294511737 | -1.322060934  | 1.2990144321  |
| H | -0.7999273397 | -1.5411892535 | 2.7157062624  |
| H | -1.4705659126 | 0.0714943922  | 2.3450778296  |

(CH<sub>3</sub>)<sub>2</sub>COO 2d TS

|   |              |               |               |
|---|--------------|---------------|---------------|
| C | 1.9355471667 | -1.3575519782 | -0.6546995511 |
| O | 2.5965704227 | -0.2602786918 | -0.4343656394 |
| O | 3.9452124701 | -0.2491240159 | -0.9727306606 |
| O | 3.3051024305 | -0.281309283  | -3.3005131251 |
| H | 3.3194763996 | 0.5744410882  | -3.7346139794 |
| H | 3.6998375416 | -0.1832037296 | -2.2052503437 |



|   |               |               |               |
|---|---------------|---------------|---------------|
| O | 1.1971381903  | -1.1423531753 | -2.4241587179 |
| H | 2.0819375349  | -0.7180997619 | -2.9345714826 |
| H | 0.5565516508  | -0.4260377828 | -2.3538218481 |
| C | 2.6581802883  | -2.6388787221 | -0.9269651914 |
| H | 3.2443487406  | -2.8753409144 | -0.0365554351 |
| H | 1.9437020612  | -3.4341303341 | -1.117941194  |
| H | 3.34688041    | -2.5445343525 | -1.7578938016 |
| C | 0.6609954714  | -1.3998821526 | 0.1390933508  |
| H | -0.0514299037 | -2.0787958975 | -0.3202552638 |
| H | 0.8956112181  | -1.7638885644 | 1.1410891115  |
| H | 0.2289159069  | -0.4059137321 | 0.2326247715  |

(CH<sub>3</sub>)<sub>2</sub>COO 2d vdW

|   |               |               |               |
|---|---------------|---------------|---------------|
| C | -0.2689468862 | -0.4376000324 | 1.0711537934  |
| O | 0.3733574537  | 0.6390637166  | 0.9286487403  |
| O | 1.6667899363  | 0.5402238144  | 0.3823631671  |
| O | 0.9401052279  | 1.0807130563  | -2.1521701869 |
| H | 0.9922687132  | 2.0240577663  | -2.3227015662 |
| H | 1.3173103494  | 0.9482239776  | -1.2446024067 |
| O | -1.4794663056 | -0.1873635564 | -1.6956399297 |
| H | -0.6792407072 | 0.3156260902  | -1.9587371349 |
| H | -1.8277964268 | -0.5577497368 | -2.509489676  |
| C | 0.3410662876  | -1.7296635419 | 0.7116253883  |
| H | 1.3087692779  | -1.817375685  | 1.2091054111  |
| H | -0.3155631071 | -2.557315763  | 0.9624315497  |
| H | 0.5534674906  | -1.7252023126 | -0.3588260006 |
| C | -1.6465734262 | -0.2965786739 | 1.59980213    |
| H | -2.337081409  | -0.5957963826 | 0.8078391771  |
| H | -1.7951461846 | -0.9637781137 | 2.4501119048  |
| H | -1.853645284  | 0.730619377   | 1.8861256391  |

*anti\_Syn*-CH<sub>3</sub>CH<sub>2</sub>CHOO

|   |               |               |               |
|---|---------------|---------------|---------------|
| C | -0.2187769326 | -0.0248791388 | 0.4160223645  |
| H | -0.3297541114 | -0.7348054864 | 1.2312419724  |
| O | -1.2451050969 | 0.2217735135  | -0.2599881973 |
| O | -2.4200258482 | -0.4115001345 | 0.0703622564  |
| C | 1.065813798   | 0.6403599543  | 0.0875746717  |
| H | 1.4081163572  | 1.1482369985  | 0.9971682101  |
| H | 1.8056187413  | -0.1514188002 | -0.0804885898 |
| C | 1.0219576401  | 1.6066521737  | -1.0939506894 |
| H | 0.3163315773  | 2.41629088    | -0.9157766961 |
| H | 2.0072817148  | 2.0407537886  | -1.2540336175 |
| H | 0.7192558704  | 1.0989051112  | -2.008135345  |

*anti\_Syn*-CH<sub>3</sub>CH<sub>2</sub>CHOO 1a TS

|   |               |               |               |
|---|---------------|---------------|---------------|
| C | 1.0523334642  | 0.2151668184  | -0.0204812717 |
| H | 1.1439339269  | 0.6593017126  | 0.9644210557  |
| O | -0.0092738396 | -0.4648049317 | -0.2535761608 |
| O | -1.1136326945 | 0.241508725   | 0.3830117173  |
| O | 0.2480993921  | 1.909995145   | -0.6857776476 |
| H | -0.6015860863 | 1.3830839919  | -0.200201874  |
| H | 0.4795813957  | 2.6527219447  | -0.1187724836 |
| C | 2.2743218379  | -0.084926275  | -0.8155404553 |
| H | 2.8954129612  | 0.8116871606  | -0.7887260287 |
| H | 2.8272817004  | -0.8458123388 | -0.251614828  |
| C | 2.0174790783  | -0.5416051201 | -2.25011007   |
| H | 2.9638403232  | -0.7118357408 | -2.7613111098 |
| H | 1.4445736482  | -1.4660799358 | -2.2753766489 |
| H | 1.4604718924  | 0.216708844   | -2.7971281944 |

*anti\_Syn*-CH<sub>3</sub>CH<sub>2</sub>CHOO 1a vdW

|   |               |               |               |
|---|---------------|---------------|---------------|
| C | 0.5142539859  | -0.1046291004 | 0.3520160591  |
| H | 0.5440883151  | 0.6412985161  | 1.1396473386  |
| O | -0.5979475949 | -0.5951872999 | 0.0577788742  |
| O | -1.7176377248 | -0.1341405102 | 0.7532474244  |
| O | -0.9312926821 | 2.4674339181  | 0.498383502   |
| H | -1.4344769462 | 1.6344648712  | 0.6361242918  |
| H | -1.5112071351 | 3.0464842405  | -0.0007140229 |
| C | 1.7264325824  | -0.5358325044 | -0.3803784097 |
| H | 2.1776314001  | 0.3770403836  | -0.7872610363 |
| H | 2.4441488649  | -0.8841932324 | 0.3717956356  |
| C | 1.5099160005  | -1.5822879328 | -1.4699740371 |
| H | 2.4591637449  | -1.8231455304 | -1.9449119724 |
| H | 1.0907166247  | -2.4995789696 | -1.0599820345 |
| H | 0.8273065647  | -1.2181978495 | -2.2357956128 |

*anti\_Syn*-CH<sub>3</sub>CH<sub>2</sub>CHOO 1b TS

|   |               |               |               |
|---|---------------|---------------|---------------|
| C | 1.0276530173  | 0.2237217411  | -0.0634619157 |
| H | 1.1160151549  | 0.6684089521  | 0.9205535559  |
| O | -0.0266767788 | -0.4673372093 | -0.3050066797 |
| O | -1.1362512915 | 0.2160015237  | 0.3481773459  |
| O | 0.2364244699  | 1.9797217047  | -0.5552374747 |
| H | -0.6128069681 | 1.402883104   | -0.1362091452 |
| H | 0.0909617182  | 2.0179289991  | -1.5072011756 |
| C | 2.2614715425  | -0.063191114  | -0.846496085  |
| H | 2.8522743296  | 0.8540805635  | -0.8454601877 |
| H | 2.8353576871  | -0.7827515477 | -0.2508299746 |
| C | 2.0390247146  | -0.5904026101 | -2.2625412647 |

|   |              |               |               |
|---|--------------|---------------|---------------|
| H | 2.9971145246 | -0.772071568  | -2.7469404141 |
| H | 1.4766964831 | -1.5216041313 | -2.2567288016 |
| H | 1.4883203966 | 0.1278715923  | -2.8693517833 |

*anti\_Syn*-CH<sub>3</sub>CH<sub>2</sub>CHOO 1b vdW

|   |               |               |               |
|---|---------------|---------------|---------------|
| C | 0.5131599978  | -0.1025993892 | 0.354061561   |
| H | 0.5321297022  | 0.6382528971  | 1.1468032135  |
| O | -0.5930927761 | -0.6007251296 | 0.0502675312  |
| O | -1.7206070004 | -0.1540112015 | 0.7424411609  |
| O | -0.9553647872 | 2.4558868679  | 0.509375006   |
| H | -1.4520934851 | 1.6177118992  | 0.6387104494  |
| H | -1.5374552508 | 3.033259851   | 0.0108677364  |
| C | 1.7331071928  | -0.518427657  | -0.3743139931 |
| H | 2.1786715048  | 0.4010055948  | -0.7725422906 |
| H | 2.4495806575  | -0.8656397514 | 0.3795741125  |
| C | 1.5317555791  | -1.5593698959 | -1.472068001  |
| H | 2.485697141   | -1.7888546944 | -1.9432175984 |
| H | 1.1182101601  | -2.4829665765 | -1.0705786079 |
| H | 0.8503273643  | -1.1960358146 | -2.2392992798 |

*anti\_Syn*-CH<sub>3</sub>CH<sub>2</sub>CHOO 2a TS

|   |               |               |               |
|---|---------------|---------------|---------------|
| C | 1.1821729219  | -0.1547359122 | -0.2315171895 |
| H | 1.9513671866  | -0.8362723535 | -0.5743639221 |
| O | 1.5406270232  | 1.0708755456  | -0.0863999955 |
| O | 2.7582076737  | 1.3794564953  | -0.8288338686 |
| O | 0.2940759848  | -0.3065797479 | -1.88751114   |
| H | -0.5694743995 | 0.1121355166  | -1.7961498489 |
| H | 0.8852452471  | 0.3638908615  | -2.5084386619 |
| O | 1.7156393203  | 1.3246556385  | -3.0366112906 |
| H | 2.2725984484  | 1.4387537249  | -2.0827581317 |
| H | 2.3214478486  | 1.0013842171  | -3.7078115908 |
| C | 0.150635941   | -0.6611113776 | 0.7335782241  |
| H | -0.2557102107 | -1.58786477   | 0.330681168   |
| H | 0.7111870915  | -0.9336632893 | 1.6335831654  |
| C | -0.9563155347 | 0.3297417365  | 1.0947906833  |
| H | -1.6219104607 | -0.1115213929 | 1.8350448921  |
| H | -0.5454875603 | 1.2484088532  | 1.5075130449  |
| H | -1.5635435213 | 0.5962022543  | 0.2287594619  |

*anti\_Syn*-CH<sub>3</sub>CH<sub>2</sub>CHOO 2a vdW

|   |              |               |              |
|---|--------------|---------------|--------------|
| C | 0.2538330573 | -0.5985074726 | 0.7707143034 |
| H | 0.8992058412 | -1.2825330078 | 0.2298413638 |
| O | 0.557658727  | 0.611963054   | 0.7546951089 |
| O | 1.7162381787 | 0.9701065097  | 0.0359856668 |

|   |               |               |               |
|---|---------------|---------------|---------------|
| O | -0.8210697027 | -1.1301925364 | -1.7607167823 |
| H | -1.6499729896 | -1.1306666964 | -2.2447540874 |
| H | -0.2882870044 | -0.4018379486 | -2.1505247376 |
| O | 0.7633651888  | 0.9864839758  | -2.4799999547 |
| H | 1.1734536691  | 1.0857320976  | -1.5818000749 |
| H | 1.4942650104  | 0.8593662126  | -3.0895057733 |
| C | -0.9270723291 | -1.0579434822 | 1.5321349383  |
| H | -1.5082791935 | -1.6646529221 | 0.8321991366  |
| H | -0.5552421545 | -1.7650248203 | 2.2843323854  |
| C | -1.7738889912 | 0.0387415566  | 2.1712007482  |
| H | -2.6143729888 | -0.4057538939 | 2.7011932898  |
| H | -1.1956958468 | 0.6273425246  | 2.8814668569  |
| H | -2.1664874718 | 0.7178668493  | 1.4163476123  |

*anti\_Syn*-CH<sub>3</sub>CH<sub>2</sub>CHOO 2b TS

|   |               |               |               |
|---|---------------|---------------|---------------|
| C | 1.8709941962  | -1.2036221723 | -0.685457022  |
| H | 2.4505466761  | -2.1197030322 | -0.7144229593 |
| O | 2.5540886955  | -0.1230742436 | -0.5710708144 |
| O | 3.9404681442  | -0.3147201974 | -0.9880786576 |
| O | 3.4174834778  | -0.1893128695 | -3.3585524334 |
| H | 3.3265715038  | 0.7118539039  | -3.6774325977 |
| H | 3.7732289434  | -0.1644930759 | -2.3014642759 |
| O | 1.3960798846  | -1.2834499473 | -2.5228137729 |
| H | 2.2418200664  | -0.7743836503 | -2.9999401654 |
| H | 1.4145801544  | -2.196885244  | -2.8298078845 |
| C | 0.5200901595  | -1.2059783432 | -0.0381767207 |
| H | -0.0396795005 | -2.0512002297 | -0.4376799074 |
| H | 0.7053770148  | -1.4285298344 | 1.0184423374  |
| C | -0.268894624  | 0.094565147   | -0.1797363194 |
| H | -1.2268943147 | 0.004591715   | 0.3304824707  |
| H | 0.2708597991  | 0.9328821512  | 0.2557237907  |
| H | -0.4583382766 | 0.3162259229  | -1.2281770683 |

*anti\_Syn*-CH<sub>3</sub>CH<sub>2</sub>CHOO 2b vdW

|   |               |               |               |
|---|---------------|---------------|---------------|
| C | -0.1065646627 | -0.5365773475 | 0.8852698006  |
| H | 0.4548304519  | -1.4398916993 | 0.6720700031  |
| O | 0.5074997075  | 0.5473798325  | 0.8094268899  |
| O | 1.8712700803  | 0.4808130039  | 0.4493823443  |
| O | 1.6121273841  | 0.3737044041  | -2.2146362857 |
| H | 1.621836655   | 1.2588736552  | -2.5859998401 |
| H | 1.8110892772  | 0.4794442176  | -1.2475922209 |
| O | -0.6840949359 | -1.0584088764 | -1.8019665837 |
| H | 0.0973805256  | -0.533069252  | -2.0846357976 |
| H | -0.711929821  | -1.8126883889 | -2.395257245  |

|   |               |               |              |
|---|---------------|---------------|--------------|
| C | -1.5326477014 | -0.5571069987 | 1.2732611303 |
| H | -2.0419112229 | -1.0980574384 | 0.4700225201 |
| H | -1.608159106  | -1.2053247366 | 2.1547395611 |
| C | -2.173561237  | 0.8047821895  | 1.5234506383 |
| H | -3.2177006996 | 0.6744119001  | 1.8019692266 |
| H | -1.670866691  | 1.3423490847  | 2.3258733252 |
| H | -2.134884004  | 1.4234004501  | 0.6287585337 |

*anti\_Syn*-CH<sub>3</sub>CH<sub>2</sub>CHOO 2c TS

|   |               |               |               |
|---|---------------|---------------|---------------|
| C | 1.2368379244  | -0.2672842063 | -0.187822047  |
| H | 1.9945066568  | -0.9910828709 | -0.4677649679 |
| O | 1.6401549199  | 0.9492876018  | -0.1070768158 |
| O | 2.8479929325  | 1.168164276   | -0.895339585  |
| O | 0.3281560864  | -0.3745783156 | -1.8428715181 |
| H | 0.5276263248  | -1.2200739199 | -2.2593737066 |
| H | 0.8191008127  | 0.409491534   | -2.43953671   |
| O | 1.5319932917  | 1.4632516501  | -2.9166382416 |
| H | 2.241851172   | 1.4283947668  | -2.0483400523 |
| H | 2.0208364632  | 1.3014758837  | -3.7267640563 |
| C | 0.1540050546  | -0.6668401678 | 0.767570657   |
| H | -0.2664324379 | -1.6098627365 | 0.4191653533  |
| H | 0.6645336829  | -0.88474761   | 1.7120605277  |
| C | -0.9389310402 | 0.3797786082  | 0.9789153493  |
| H | -1.675181534  | 0.0082921303  | 1.6903736366  |
| H | -0.5261962271 | 1.3077657376  | 1.3687923427  |
| H | -1.4465710826 | 0.5992466385  | 0.041773834   |

*anti\_Syn*-CH<sub>3</sub>CH<sub>2</sub>CHOO 2c vdW

|   |               |               |               |
|---|---------------|---------------|---------------|
| C | 0.2843465606  | -0.5389793738 | 0.7796245229  |
| H | 0.9839547741  | -1.1956192224 | 0.2733510821  |
| O | 0.5091402939  | 0.6877379426  | 0.7302515309  |
| O | 1.6567502263  | 1.0986806129  | 0.0222724295  |
| O | -0.700657072  | -1.2182262198 | -1.7530883518 |
| H | -1.5174945434 | -1.2880770323 | -2.2523581838 |
| H | -0.2083079474 | -0.4689148655 | -2.156118095  |
| O | 0.7575535324  | 0.9745367548  | -2.5104038656 |
| H | 1.1414904573  | 1.1282589554  | -1.6083240863 |
| H | 1.507729865   | 0.876826103   | -3.1016389542 |
| C | -0.8798457081 | -1.0510890325 | 1.5331365319  |
| H | -1.4056601731 | -1.7160222767 | 0.8423467089  |
| H | -0.478637904  | -1.7086012265 | 2.3146304638  |
| C | -1.8092932105 | 0.0069486436  | 2.1204227119  |
| H | -2.6299975626 | -0.4750959857 | 2.6485883839  |
| H | -1.2855243096 | 0.6539431161  | 2.8220640763  |

|   |               |              |              |
|---|---------------|--------------|--------------|
| H | -2.2293482789 | 0.6351341068 | 1.3367870943 |
|---|---------------|--------------|--------------|

*anti\_Syn*-CH<sub>3</sub>CH<sub>2</sub>CHOO 2d TS

|   |               |               |               |
|---|---------------|---------------|---------------|
| C | 1.839612035   | -1.0913836472 | -0.7489241332 |
| H | 2.4542766579  | -1.9782176552 | -0.8484486781 |
| O | 2.4718217177  | 0.0139645088  | -0.5696249472 |
| O | 3.8765191849  | -0.0843501916 | -0.9554654081 |
| O | 3.5497590323  | -0.4217052147 | -3.3469154876 |
| H | 3.6156312435  | 0.3872643266  | -3.8595155254 |
| H | 3.7926774629  | -0.1958609289 | -2.2859154266 |
| O | 1.3584812518  | -1.1944010165 | -2.5678190532 |
| H | 2.2722203641  | -0.8420882977 | -3.0404603697 |
| H | 0.692295281   | -0.5140781422 | -2.7163689469 |
| C | 0.5095918068  | -1.2131009896 | -0.0648476324 |
| H | -0.0215811713 | -2.0496740777 | -0.5164449997 |
| H | 0.7442915722  | -1.51117118   | 0.9620649046  |
| C | -0.3447462762 | 0.0546978565  | -0.0515930871 |
| H | -1.2581368933 | -0.1196072437 | 0.514988896   |
| H | 0.1875235464  | 0.8863991938  | 0.4046948787  |
| H | -0.6404068158 | 0.3574326993  | -1.057114984  |

*anti\_Syn*-CH<sub>3</sub>CH<sub>2</sub>CHOO 2d vdW

|   |               |               |               |
|---|---------------|---------------|---------------|
| C | -0.1201217605 | -0.5590260514 | 0.8776844103  |
| H | 0.4254152362  | -1.4700792482 | 0.6563993286  |
| O | 0.5148643214  | 0.5139188768  | 0.8196162521  |
| O | 1.8794347633  | 0.4259839809  | 0.4672673914  |
| O | 1.6355755028  | 0.357773278   | -2.1994727152 |
| H | 1.6644614702  | 1.2472592084  | -2.5593478886 |
| H | 1.8302382064  | 0.447372897   | -1.2299267054 |
| O | -0.6900075043 | -1.0355103675 | -1.8195925976 |
| H | 0.1031047669  | -0.5215896686 | -2.0906013343 |
| H | -0.72829682   | -1.7815012104 | -2.4226992897 |
| C | -1.5488244496 | -0.5573347511 | 1.2564683303  |
| H | -2.0630321627 | -1.0782138548 | 0.4431759536  |
| H | -1.6423301645 | -1.2151725312 | 2.1290498746  |
| C | -2.1654084205 | 0.8132151889  | 1.5201425764  |
| H | -3.213615994  | 0.6992150098  | 1.7904406765  |
| H | -1.6578245563 | 1.3308486541  | 2.3325318837  |
| H | -2.1092084348 | 1.4423295893  | 0.6337368532  |

*anti\_Gauche*-CH<sub>3</sub>CH<sub>2</sub>CHOO

|   |               |               |               |
|---|---------------|---------------|---------------|
| C | 0.2911152969  | 0.2879212462  | 0.1124792497  |
| H | -0.0387328856 | 1.0205866495  | 0.8446128257  |
| O | -0.5814155921 | -0.1572525847 | -0.6724959562 |

|   |               |               |               |
|---|---------------|---------------|---------------|
| O | -1.8665321437 | 0.3080924985  | -0.5626142463 |
| C | 1.6840766093  | -0.2087484216 | 0.0130500057  |
| H | 2.3315160357  | 0.6462528268  | -0.2083070448 |
| H | 1.7529834481  | -0.8982592366 | -0.8271550762 |
| C | 2.1594615328  | -0.8741634984 | 1.3177458353  |
| H | 1.5665736448  | -1.7592158122 | 1.5434935186  |
| H | 3.2013135271  | -1.1759417801 | 1.2214929021  |
| H | 2.0850185266  | -0.1899928876 | 2.1629979864  |

*anti\_Gauche*-CH<sub>3</sub>CH<sub>2</sub>CHOO 1a TS

|   |               |               |               |
|---|---------------|---------------|---------------|
| C | 1.0463148438  | 0.2649114554  | 0.0086686544  |
| H | 1.1200450124  | 0.7663054313  | 0.9679257455  |
| O | 0.036083425   | -0.5020048978 | -0.1711286773 |
| O | -1.1086312594 | 0.1467104374  | 0.4576254101  |
| O | 0.1035471875  | 1.8670890188  | -0.7194313316 |
| H | -0.6910206538 | 1.3042137543  | -0.1988286869 |
| H | 0.2751774273  | 2.6550141926  | -0.1935160491 |
| C | 2.2651638775  | 0.0082493053  | -0.8063417023 |
| H | 2.714272477   | -0.9046181495 | -0.3988783611 |
| H | 1.9591449993  | -0.2186274518 | -1.8264426235 |
| C | 3.2767261067  | 1.1542995017  | -0.7615326746 |
| H | 3.574160781   | 1.3848852083  | 0.2622351293  |
| H | 4.1752383829  | 0.8829395787  | -1.3129403579 |
| H | 2.8625063927  | 2.0543006153  | -1.2115834752 |

*anti\_Gauche*-CH<sub>3</sub>CH<sub>2</sub>CHOO 1a vdW

|   |               |               |               |
|---|---------------|---------------|---------------|
| C | 0.3466658993  | -0.380500324  | 0.4163355071  |
| H | 0.1938354007  | 0.4927816901  | 1.0431062507  |
| O | -0.6681441702 | -1.0079854563 | 0.0362128114  |
| O | -1.9160129591 | -0.5415412305 | 0.4415240299  |
| O | -1.2803055106 | 2.0693789159  | -0.0555731835 |
| H | -1.7350744141 | 1.2157707302  | 0.1174226883  |
| H | -1.8246007422 | 2.5338170408  | -0.6949111254 |
| C | 1.6845175224  | -0.8321309009 | -0.0268690881 |
| H | 2.2661935218  | -1.0688172094 | 0.87008787    |
| H | 1.5806275192  | -1.7466274194 | -0.6086479331 |
| C | 2.4156057963  | 0.2633453772  | -0.8271446815 |
| H | 2.505775486   | 1.1826744506  | -0.2500884237 |
| H | 3.4169153751  | -0.0784877104 | -1.0835581497 |
| H | 1.8821632754  | 0.4939630461  | -1.7473085724 |

*anti\_Gauche*-CH<sub>3</sub>CH<sub>2</sub>CHOO 1b TS

|   |              |              |               |
|---|--------------|--------------|---------------|
| C | 1.0361492811 | 0.2655466071 | -0.0200181607 |
| H | 1.0953911455 | 0.8107739655 | 0.9152326109  |

|   |               |                          |               |
|---|---------------|--------------------------|---------------|
| O | 0.0400010636  | -0.5264689309            | -0.177184551  |
| O | -1.1152273214 | 0.1214034117             | 0.434407851   |
| O | 0.0943316548  | 1.9023701825             | -0.669678288  |
| H | -0.6920877362 | 1.3094226014             | -0.1812162055 |
| H | -0.0632407749 | 1.8204870031             | -1.6172791917 |
| C | 2.2723569667  | -0.0034289 -0.8072122092 |               |
| H | 2.7189144753  | -0.9005616305            | -0.3634005855 |
| H | 1.9960917954  | -0.2720792234            | -1.82673196   |
| C | 3.2756053226  | 1.1511120785             | -0.7717540822 |
| H | 3.5703781816  | 1.3863840118             | 0.2509574866  |
| H | 4.1744735277  | 0.8831675311             | -1.3243506623 |
| H | 2.8542424181  | 2.051432292              | -1.2138630525 |

*anti\_Gauche*-CH<sub>3</sub>CH<sub>2</sub>CHO 1b vdW

|   |               |               |               |
|---|---------------|---------------|---------------|
| C | 0.3463223829  | -0.3672268614 | 0.427937861   |
| H | 0.1708784496  | 0.5163643496  | 1.0339964267  |
| O | -0.6530509248 | -1.0178994309 | 0.0459068364  |
| O | -1.9138059278 | -0.5623598564 | 0.4227447094  |
| O | -1.3098630951 | 2.0471805168  | -0.1191910606 |
| H | -1.7543484209 | 1.1904551281  | 0.0647744852  |
| H | -1.851282557  | 2.4899430221  | -0.7761075964 |
| C | 1.6973948555  | -0.807359497  | 0.0142526366  |
| H | 2.2688349796  | -1.0165366548 | 0.9245276318  |
| H | 1.616111977   | -1.7351569639 | -0.5497942841 |
| C | 2.4240561667  | 0.2824351568  | -0.7977264928 |
| H | 2.4916197467  | 1.2147559454  | -0.2387060781 |
| H | 3.4341719813  | -0.0492349286 | -1.0319907033 |
| H | 1.9012833862  | 0.4858050743  | -1.7303553717 |

*anti\_Gauche*-CH<sub>3</sub>CH<sub>2</sub>CHO 2a TS

|   |               |               |               |
|---|---------------|---------------|---------------|
| C | 1.1607950619  | -0.2032543098 | -0.2797087365 |
| H | 1.8832110522  | -0.8922289185 | -0.7028179128 |
| O | 1.5817270554  | 0.9897089834  | -0.0579675209 |
| O | 2.7947773483  | 1.294729305   | -0.8105371794 |
| O | 0.2048291234  | -0.1700341369 | -1.9106650005 |
| H | -0.610412371  | 0.3180355509  | -1.7440888447 |
| H | 0.8242606581  | 0.4931749708  | -2.5014524611 |
| O | 1.7061783815  | 1.4408245855  | -2.9974000068 |
| H | 2.2833726522  | 1.4640632572  | -2.0576467393 |
| H | 2.2810052566  | 1.1279778448  | -3.6999952312 |
| C | 0.1325876192  | -0.7149683871 | 0.6869133871  |
| H | -0.6561497691 | 0.0308970429  | 0.7978286462  |
| H | 0.6458393184  | -0.7529078466 | 1.6522567199  |
| C | -0.4311312982 | -2.0926430943 | 0.3417760181  |



|   |               |               |               |
|---|---------------|---------------|---------------|
| H | 0.3656412126  | -2.8316886676 | 0.2533361815  |
| H | -1.1063158755 | -2.4265605177 | 1.1282290067  |
| H | -0.9787634259 | -2.0806056619 | -0.5978043262 |

*anti\_Gauche*-CH<sub>3</sub>CH<sub>2</sub>CHO 2a vdW

|   |               |               |               |
|---|---------------|---------------|---------------|
| C | 0.3112185181  | -0.4143050931 | 0.946569667   |
| H | 0.8832616394  | -1.0642437317 | 0.292535438   |
| O | 0.5814797218  | 0.8057533444  | 0.9277978844  |
| O | 1.6375617641  | 1.2137977768  | 0.0963637373  |
| O | -0.6731701763 | -0.8523483691 | -1.7156474993 |
| H | -1.4387836786 | -1.046387968  | -2.2608941297 |
| H | -0.3129498696 | -0.0045758351 | -2.0564970358 |
| O | 0.4373204635  | 1.5963286341  | -2.2856565034 |
| H | 0.9184283684  | 1.5819719401  | -1.4195516242 |
| H | 1.11686664    | 1.6757269543  | -2.9593771911 |
| C | -0.7190514412 | -0.9053395353 | 1.8899774664  |
| H | -1.2077616839 | -0.0510748232 | 2.3566512319  |
| H | -0.1749353447 | -1.4368695496 | 2.681145933   |
| C | -1.7326956461 | -1.864685047  | 1.2491467811  |
| H | -1.2338926976 | -2.7075943786 | 0.7734001349  |
| H | -2.4021118867 | -2.2501713326 | 2.0164070848  |
| H | -2.3196196907 | -1.3540889864 | 0.4904306249  |

*anti\_Gauche*-CH<sub>3</sub>CH<sub>2</sub>CHO 2b TS

|   |               |               |               |
|---|---------------|---------------|---------------|
| C | 1.8535397403  | -1.2461721664 | -0.7259448443 |
| H | 2.422982198   | -2.1670902979 | -0.7977791408 |
| O | 2.5445433285  | -0.1788351973 | -0.5541103581 |
| O | 3.933110672   | -0.3622846872 | -0.9699870281 |
| O | 3.417383271   | -0.0698462966 | -3.3319737575 |
| H | 3.328225401   | 0.8523270751  | -3.584405228  |
| H | 3.7729189043  | -0.1185976055 | -2.2844541159 |
| O | 1.3936258095  | -1.2246189328 | -2.5681092781 |
| H | 2.2336627346  | -0.681791892  | -3.0035727416 |
| H | 1.4234816017  | -2.1135553866 | -2.9395450399 |
| C | 0.5007806392  | -1.2470442631 | -0.0828717106 |
| H | 0.0029292612  | -0.3082300111 | -0.3221591488 |
| H | 0.695846306   | -1.2353101305 | 0.9939259249  |
| C | -0.3691086082 | -2.4498747171 | -0.4422311299 |
| H | 0.1459922548  | -3.3904227408 | -0.2404418645 |
| H | -1.2807402671 | -2.4425556437 | 0.1531507846  |
| H | -0.6572262468 | -2.4306041065 | -1.4913143233 |

*anti\_Gauche*-CH<sub>3</sub>CH<sub>2</sub>CHO 2b vdW

|   |               |               |              |
|---|---------------|---------------|--------------|
| C | -0.0532410043 | -0.3591457019 | 0.9902917105 |
|---|---------------|---------------|--------------|

|   |               |               |               |
|---|---------------|---------------|---------------|
| H | 0.4731861734  | -1.2630382285 | 0.7013674325  |
| O | 0.5726120678  | 0.7178746894  | 0.901364569   |
| O | 1.9088894334  | 0.63844001    | 0.4578521507  |
| O | 1.541343395   | 1.018379671   | -2.1668550913 |
| H | 1.4904019586  | 1.9525284274  | -2.3816748404 |
| H | 1.7842461558  | 0.9676978825  | -1.2061723259 |
| O | -0.6490672324 | -0.5647725678 | -1.7309620394 |
| H | 0.0803310512  | 0.0340177069  | -2.0071018103 |
| H | -0.6163110908 | -1.3007059486 | -2.3470650654 |
| C | -1.418394498  | -0.3557533133 | 1.5656478945  |
| H | -1.8059845709 | 0.6622363143  | 1.5486011563  |
| H | -1.2960869745 | -0.6285122117 | 2.6224556781  |
| C | -2.3757435006 | -1.3472318508 | 0.8939324865  |
| H | -1.9795217152 | -2.3623675431 | 0.927648563   |
| H | -3.3306540967 | -1.3436508275 | 1.4167824284  |
| H | -2.5356105518 | -1.0779905083 | -0.1461658967 |

*anti\_Gauche*-CH<sub>3</sub>CH<sub>2</sub>CHOO 2c TS

|   |               |               |               |
|---|---------------|---------------|---------------|
| C | 1.2144118163  | -0.3012609377 | -0.28733665   |
| H | 1.9456494074  | -1.0353802011 | -0.6103143997 |
| O | 1.6565730733  | 0.8953803129  | -0.1422956603 |
| O | 2.8704007218  | 1.1176589152  | -0.9218344164 |
| O | 0.2991059682  | -0.2824907486 | -1.9394555137 |
| H | 0.4734588539  | -1.0985532662 | -2.4210367359 |
| H | 0.8030229671  | 0.5250014889  | -2.482009255  |
| O | 1.5454269648  | 1.5936471562  | -2.9071362231 |
| H | 2.2593927862  | 1.4810552724  | -2.0597331394 |
| H | 2.0214547974  | 1.4719200895  | -3.7317745766 |
| C | 0.1217553302  | -0.6972109044 | 0.658254405   |
| H | -0.6304802852 | 0.0905179257  | 0.6647754677  |
| H | 0.5855664072  | -0.6994326517 | 1.6493314499  |
| C | -0.4993173434 | -2.0622313235 | 0.3690584168  |
| H | 0.2591140538  | -2.8456403982 | 0.3245297409  |
| H | -1.1984890868 | -2.3295020614 | 1.1598435639  |
| H | -1.0473684323 | -2.0560766679 | -0.5709774743 |

*anti\_Gauche*-CH<sub>3</sub>CH<sub>2</sub>CHOO 2c vdW

|   |               |               |               |
|---|---------------|---------------|---------------|
| C | 0.3235056334  | -0.4543520547 | 0.9264248691  |
| H | 0.941072058   | -1.1801431203 | 0.4076561346  |
| O | 0.6355730071  | 0.7489203599  | 0.8061941898  |
| O | 1.7723473567  | 1.032975446   | 0.0264733072  |
| O | -0.8448575751 | -0.6822249301 | -1.6281481814 |
| H | -0.7857895652 | -1.3142870302 | -2.3482390986 |
| H | -0.4473595504 | 0.1467989897  | -1.9725009164 |

|   |               |               |               |
|---|---------------|---------------|---------------|
| O | 0.4184858373  | 1.7035274521  | -2.1978645677 |
| H | 1.0116019434  | 1.5849943658  | -1.4126135366 |
| H | 0.9928250584  | 1.8870098533  | -2.9444079913 |
| C | -0.8026615681 | -0.8226202861 | 1.8151403849  |
| H | -1.380407694  | 0.0728770205  | 2.0408494909  |
| H | -0.3477752275 | -1.1530836464 | 2.7582595863  |
| C | -1.682435828  | -1.9479443439 | 1.2551576517  |
| H | -1.0950077901 | -2.8438704303 | 1.0532843192  |
| H | -2.4494296529 | -2.2070676106 | 1.9830531827  |
| H | -2.1568244429 | -1.6373760348 | 0.3284831757  |

*anti\_Gauche*-CH<sub>3</sub>CH<sub>2</sub>CHO 2d TS

|   |               |               |               |
|---|---------------|---------------|---------------|
| C | 1.7925619787  | -1.1398021997 | -0.7556371064 |
| H | 2.3880340733  | -2.0245977748 | -0.9522563771 |
| O | 2.4473538067  | -0.0648244397 | -0.4960417964 |
| O | 3.8441688077  | -0.1521610826 | -0.9136084293 |
| O | 3.4857751168  | -0.3233003931 | -3.322602668  |
| H | 3.585012808   | 0.5121816188  | -3.7848305529 |
| H | 3.7435337632  | -0.1745161149 | -2.2580667374 |
| O | 1.2647477824  | -1.0508980624 | -2.5687815952 |
| H | 2.1850734604  | -0.710688956  | -3.0255440642 |
| H | 0.6482172561  | -0.3112280929 | -2.6206054414 |
| C | 0.4753480192  | -1.2811198702 | -0.0498720926 |
| H | -0.0976744569 | -0.3604753171 | -0.1723301715 |
| H | 0.7293121811  | -1.3358522365 | 1.012865507   |
| C | -0.3325867304 | -2.5122623328 | -0.4576303387 |
| H | 0.244363521   | -3.4257739931 | -0.3113432274 |
| H | -1.2312312247 | -2.5869745235 | 0.1529417947  |
| H | -0.6294661625 | -2.4703552296 | -1.5029227032 |

*anti\_Gauche*-CH<sub>3</sub>CH<sub>2</sub>CHO 2d vdW

|   |               |               |               |
|---|---------------|---------------|---------------|
| C | -0.0111305055 | -0.4511660373 | 0.9318271422  |
| H | 0.4431717055  | -1.3574556458 | 0.5446919819  |
| O | 0.6748973892  | 0.5916310416  | 0.892923749   |
| O | 1.9797115269  | 0.4715553654  | 0.3716838994  |
| O | 1.5048984726  | 1.0839401309  | -2.1911437302 |
| H | 1.5011106003  | 2.0338264803  | -2.3292669348 |
| H | 1.7921841643  | 0.9414916342  | -1.2521783939 |
| O | -0.7545844639 | -0.4004200635 | -1.7602447285 |
| H | -0.0043386443 | 0.175752059   | -2.0285392162 |
| H | -0.7984508765 | -1.0845459699 | -2.432778229  |
| C | -1.342806454  | -0.4157955562 | 1.5799623859  |
| H | -1.667035888  | 0.6208666613  | 1.6637867149  |
| H | -1.1846383901 | -0.7800756744 | 2.6039166898  |

|   |               |               |               |
|---|---------------|---------------|---------------|
| C | -2.392219704  | -1.2925879292 | 0.8866258587  |
| H | -2.0583714208 | -2.328261825  | 0.8191420771  |
| H | -3.3175858146 | -1.2764218606 | 1.4599280636  |
| H | -2.5872056971 | -0.9309988109 | -0.1189023299 |

*anti\_Gauche*-CH<sub>3</sub>CH<sub>2</sub>CHOO 1a' TS

|   |               |               |               |
|---|---------------|---------------|---------------|
| C | 1.0220788733  | 0.2240776654  | -0.0096597125 |
| H | 1.0604659436  | 0.6374454133  | 0.9925900998  |
| O | -0.0269995977 | -0.4438138734 | -0.3224076711 |
| O | -1.1638956629 | 0.2456253031  | 0.2720860641  |
| O | 0.2677317276  | 1.937787345   | -0.6682739068 |
| H | -0.6109181239 | 1.4076180007  | -0.2516549965 |
| H | 0.4663539192  | 2.6646087096  | -0.0688974316 |
| C | 2.2795195805  | -0.0830617391 | -0.7425681114 |
| H | 2.8541136854  | 0.8409932417  | -0.8076981128 |
| H | 2.02961399    | -0.3923338349 | -1.7557715431 |
| C | 3.0986187536  | -1.1654141118 | -0.0173563734 |
| H | 2.5514783072  | -2.1053796514 | 0.0305261472  |
| H | 4.0308960687  | -1.3406978638 | -0.551896779  |
| H | 3.3476655352  | -0.8637696044 | 1.0003173271  |

*anti\_Gauche*-CH<sub>3</sub>CH<sub>2</sub>CHOO 1a' vdW

|   |               |               |               |
|---|---------------|---------------|---------------|
| C | 0.2896198358  | -0.207561791  | 0.0431886189  |
| H | 0.3850235844  | 0.6517624199  | 0.6996791192  |
| O | -0.8624242106 | -0.643962551  | -0.1809326482 |
| O | -1.937491528  | 0.0169668328  | 0.4081962982  |
| O | -0.9245921273 | 2.4859403043  | -0.1786016214 |
| H | -1.4983564172 | 1.7244152784  | 0.0584195756  |
| H | -1.4424603457 | 3.0313879598  | -0.774483766  |
| C | 1.4506886149  | -0.8699165958 | -0.5918921833 |
| H | 1.9217604428  | -0.1285116588 | -1.2460521514 |
| H | 1.0993344725  | -1.6884856399 | -1.2181125617 |
| C | 2.4790563471  | -1.3537751158 | 0.446352687   |
| H | 2.0535951256  | -2.1206018871 | 1.0919145333  |
| H | 3.3436035101  | -1.7772259698 | -0.0618940792 |
| H | 2.8262756955  | -0.5329905861 | 1.073463179   |

*anti\_Gauche*-CH<sub>3</sub>CH<sub>2</sub>CHOO 1b' TS

|   |               |               |               |
|---|---------------|---------------|---------------|
| C | 0.9975886879  | 0.2283345945  | -0.0440396272 |
| H | 1.0386272868  | 0.6426048595  | 0.9568226677  |
| O | -0.0528655888 | -0.4368240005 | -0.3634836569 |
| O | -1.1863541224 | 0.2445178411  | 0.2477420332  |
| O | 0.2676191937  | 2.007907068   | -0.5344487846 |
| H | -0.6120577086 | 1.4440134755  | -0.1805733836 |

|   |              |               |               |
|---|--------------|---------------|---------------|
| H | 0.1845728367 | 2.0603213184  | -1.4935088501 |
| C | 2.2602986299 | -0.0768550513 | -0.770477177  |
| H | 2.8266490641 | 0.8521392908  | -0.8408914791 |
| H | 2.02411526   | -0.4108465389 | -1.7800261251 |
| C | 3.0873675039 | -1.1383431326 | -0.0228197065 |
| H | 2.5502404594 | -2.0832944347 | 0.0380421065  |
| H | 4.0249237317 | -1.3117540166 | -0.5486070082 |
| H | 3.3254797656 | -0.8144682732 | 0.9902569907  |

*anti\_Gauche*-CH<sub>3</sub>CH<sub>2</sub>CHOO 1b' vdW

|   |               |               |               |
|---|---------------|---------------|---------------|
| C | 0.2901930255  | -0.206830951  | 0.0425867769  |
| H | 0.3750826433  | 0.6397166613  | 0.7168791901  |
| O | -0.8575415633 | -0.6437172528 | -0.2017835676 |
| O | -1.9414714411 | 0.0007114405  | 0.3893813363  |
| O | -0.9339867173 | 2.4852269857  | -0.1381610727 |
| H | -1.506630121  | 1.7166619858  | 0.0779214256  |
| H | -1.4483235386 | 3.0401279438  | -0.7283464321 |
| C | 1.4605864861  | -0.8514013012 | -0.5936756895 |
| H | 1.9348255819  | -0.095126951  | -1.2282317739 |
| H | 1.1192711697  | -1.658913314  | -1.2394968789 |
| C | 2.4806653351  | -1.3512720854 | 0.4451601898  |
| H | 2.052236447   | -2.1325939342 | 1.0710798609  |
| H | 3.3521928207  | -1.760794288  | -0.0625785091 |
| H | 2.8178278721  | -0.5415809395 | 1.0918731441  |

*anti\_Gauche*-CH<sub>3</sub>CH<sub>2</sub>CHOO 2a' TS

|   |               |               |               |
|---|---------------|---------------|---------------|
| C | 1.2077584714  | -0.1817080744 | -0.1995925349 |
| H | 1.982076024   | -0.8440856098 | -0.5695784023 |
| O | 1.5433959285  | 1.0499880848  | -0.0536918327 |
| O | 2.7316976968  | 1.3942523234  | -0.8269308049 |
| O | 0.2619196681  | -0.3359634549 | -1.8190195198 |
| H | -0.6026439514 | 0.0690527509  | -1.6818112493 |
| H | 0.8132933025  | 0.3470398859  | -2.4520699092 |
| O | 1.6144381126  | 1.3365298764  | -3.0054442061 |
| H | 2.1982756718  | 1.45557383    | -2.0792116957 |
| H | 2.2047472435  | 1.0345361902  | -3.6999387634 |
| C | 0.2099011163  | -0.6996334802 | 0.7926103585  |
| H | -0.2478208892 | -1.5972914818 | 0.3805671999  |
| H | -0.5703632233 | 0.0491552255  | 0.9350665238  |
| C | 0.8927766191  | -1.0121311965 | 2.1328893898  |
| H | 1.3359941402  | -0.1165139469 | 2.5639156307  |
| H | 0.162123212   | -1.407763154  | 2.8369587425  |
| H | 1.6793618571  | -1.7573377686 | 2.0125810732  |

*anti\_Gauche*-CH<sub>3</sub>CH<sub>2</sub>CHOO 2a' vdW

|   |               |               |               |
|---|---------------|---------------|---------------|
| C | 0.1511513434  | -0.2413895385 | 0.7192165648  |
| H | 0.7099792244  | -0.9563500922 | 0.1242609648  |
| O | 0.4790458118  | 0.9611308008  | 0.6331252445  |
| O | 1.5411828784  | 1.275851821   | -0.2329754593 |
| O | -1.1680174512 | -0.949260629  | -1.6639325055 |
| H | -2.0404758924 | -0.9681790363 | -2.0637690467 |
| H | -0.6747017045 | -0.2454959249 | -2.1405730693 |
| O | 0.3452325919  | 1.1168891341  | -2.6423474174 |
| H | 0.8374732394  | 1.2764984084  | -1.7963487687 |
| H | 1.0165016067  | 0.9523916936  | -3.3088661304 |
| C | -0.9367611882 | -0.6376229049 | 1.638108223   |
| H | -1.7042213885 | -1.1047026014 | 1.0163832802  |
| H | -1.3631561748 | 0.25310015    | 2.0964860958  |
| C | -0.448634266  | -1.6400461971 | 2.7001067853  |
| H | 0.3054037556  | -1.1952275913 | 3.3479158191  |
| H | -1.2873990112 | -1.9527385022 | 3.3196362543  |
| H | -0.0223413748 | -2.5304619902 | 2.2386041655  |

*anti\_Gauche*-CH<sub>3</sub>CH<sub>2</sub>CHOO 2b' TS

|   |               |               |               |
|---|---------------|---------------|---------------|
| C | 1.876973375   | -1.2312734072 | -0.6525987062 |
| H | 2.4713356904  | -2.137215087  | -0.7112120187 |
| O | 2.5448858242  | -0.1411550262 | -0.5394457717 |
| O | 3.9228686268  | -0.29948414   | -0.996545082  |
| O | 3.3217430099  | -0.1483208215 | -3.3543553844 |
| H | 3.2111612827  | 0.7569876489  | -3.6548567476 |
| H | 3.7106982945  | -0.1325503139 | -2.3201353849 |
| O | 1.3375613505  | -1.2831215883 | -2.4648333667 |
| H | 2.1543392346  | -0.7594076446 | -2.9598690214 |
| H | 1.3481864547  | -2.1881922301 | -2.7966339728 |
| C | 0.5483998336  | -1.2479231116 | 0.0373851714  |
| H | -0.0524739017 | -2.0481395276 | -0.3917571662 |
| H | 0.0401594648  | -0.3069850079 | -0.1679802817 |
| C | 0.7230163499  | -1.4571517915 | 1.5492882161  |
| H | 1.2973519593  | -0.6458725968 | 1.9925092986  |
| H | -0.2526069006 | -1.4907781211 | 2.0322024074  |
| H | 1.2360890512  | -2.3944202337 | 1.767238811   |

*anti\_Gauche*-CH<sub>3</sub>CH<sub>2</sub>CHOO 2b' vdW

|   |               |               |               |
|---|---------------|---------------|---------------|
| C | -0.0651716434 | -0.1719305783 | 0.7837287777  |
| H | 0.3951403562  | -1.1071019802 | 0.4822536131  |
| O | 0.6126669948  | 0.8688016019  | 0.6478872292  |
| O | 1.9027422563  | 0.7227029341  | 0.101485857   |
| O | 1.2829998967  | 0.5386764611  | -2.5018739547 |

|   |               |               |               |
|---|---------------|---------------|---------------|
| H | 1.2871790704  | 1.4114979906  | -2.9016433484 |
| H | 1.6124458919  | 0.6614855843  | -1.5738510947 |
| O | -1.019347085  | -0.7708180013 | -1.8041128378 |
| H | -0.2498191973 | -0.2921146992 | -2.1846457578 |
| H | -1.1579691279 | -1.5285284502 | -2.3770632347 |
| C | -1.4287677061 | -0.0880065715 | 1.3470106572  |
| H | -2.101584083  | -0.3677670108 | 0.5310931979  |
| H | -1.6421386317 | 0.9444268682  | 1.6194430761  |
| C | -1.6235391106 | -1.0426094975 | 2.5370918724  |
| H | -0.9765875513 | -0.7755098375 | 3.371650548   |
| H | -2.6556747814 | -0.994722925  | 2.8796244498  |
| H | -1.4117305486 | -2.0743148889 | 2.2567579495  |

*anti\_Gauche*-CH<sub>3</sub>CH<sub>2</sub>CHO 2c' TS

|   |               |               |               |
|---|---------------|---------------|---------------|
| C | 1.2862759149  | -0.3001545932 | -0.2021911918 |
| H | 2.0588385389  | -0.9991884336 | -0.5061762766 |
| O | 1.6590062622  | 0.9254318318  | -0.1089291583 |
| O | 2.8478095614  | 1.1908161063  | -0.9122229171 |
| O | 0.3367774137  | -0.402872629  | -1.8222151986 |
| H | 0.5251888154  | -1.240672791  | -2.2594501708 |
| H | 0.7962867616  | 0.3886211867  | -2.4211236585 |
| O | 1.4860792119  | 1.4679341302  | -2.9140359812 |
| H | 2.2057895112  | 1.4482614923  | -2.067854873  |
| H | 1.9671591223  | 1.321365513   | -3.7316884126 |
| C | 0.234022405   | -0.7252595651 | 0.7750521875  |
| H | -0.2279276291 | -1.6400936004 | 0.4071387538  |
| H | -0.5364989615 | 0.0435495029  | 0.8073186078  |
| C | 0.841281133   | -0.9507394669 | 2.1678333391  |
| H | 1.2781244648  | -0.0329599075 | 2.5567593923  |
| H | 0.0672478572  | -1.2819955635 | 2.8587293162  |
| H | 1.6193966172  | -1.7146262132 | 2.1469642418  |

*anti\_Gauche*-CH<sub>3</sub>CH<sub>2</sub>CHO 2c' vdW

|   |               |               |               |
|---|---------------|---------------|---------------|
| C | 0.1379842783  | -0.2499336335 | 0.7126726055  |
| H | 0.6771915765  | -0.976180838  | 0.113298014   |
| O | 0.4935582246  | 0.9448079025  | 0.6281649505  |
| O | 1.5588113993  | 1.2369028528  | -0.2420254772 |
| O | -1.2082619573 | -0.920348891  | -1.6661657344 |
| H | -2.0827370629 | -0.9177673309 | -2.0620160835 |
| H | -0.7007739738 | -0.2270536654 | -2.1432708393 |
| O | 0.3484978033  | 1.1124154256  | -2.6462457893 |
| H | 0.8481897527  | 1.2581961546  | -1.8021213405 |
| H | 1.0126875178  | 0.9340295377  | -3.316275042  |
| C | -0.954706256  | -0.6230558893 | 1.6355612389  |

|   |               |               |              |
|---|---------------|---------------|--------------|
| H | -1.7357253196 | -1.0703689051 | 1.0161899198 |
| H | -1.3580245898 | 0.276170805   | 2.0982016887 |
| C | -0.4853519896 | -1.6394813677 | 2.6927024004 |
| H | 0.2818464558  | -1.2141793029 | 3.3381620844 |
| H | -1.3283750637 | -1.9341147845 | 3.3152960076 |
| H | -0.0821427955 | -2.5383900699 | 2.2269383964 |

*anti\_Gauche*-CH<sub>3</sub>CH<sub>2</sub>CHOO 2d' TS

|   |               |               |               |
|---|---------------|---------------|---------------|
| C | 1.8191897731  | -1.1013749264 | -0.6694278329 |
| H | 2.4548200858  | -1.9721836802 | -0.7845393653 |
| O | 2.4256708179  | 0.0216611787  | -0.5148755636 |
| O | 3.8188574044  | -0.0364859505 | -0.9468414462 |
| O | 3.406879158   | -0.3723734342 | -3.3315310263 |
| H | 3.4319300356  | 0.44118052    | -3.8404987975 |
| H | 3.6871641352  | -0.146238456  | -2.2887962534 |
| O | 1.2696024146  | -1.2192848772 | -2.4650625147 |
| H | 2.145313249   | -0.8370691759 | -2.9720327581 |
| H | 0.5750472826  | -0.560029344  | -2.5770926524 |
| C | 0.5144244681  | -1.2355897526 | 0.057032464   |
| H | -0.0552280938 | -2.0376981668 | -0.4087068328 |
| H | -0.0493607155 | -0.3077763196 | -0.049566165  |
| C | 0.7542789472  | -1.5395452903 | 1.5438068962  |
| H | 1.3065505534  | -0.7339136463 | 2.0237641111  |
| H | -0.1997373014 | -1.656003868  | 2.0560394038  |
| H | 1.3186277857  | -2.4632478108 | 1.6729333329  |

*anti\_Gauche*-CH<sub>3</sub>CH<sub>2</sub>CHOO 2d' vdW

|   |               |               |               |
|---|---------------|---------------|---------------|
| C | -0.0634208434 | -0.1877393135 | 0.7750893374  |
| H | 0.4100177634  | -1.1180180711 | 0.4788507817  |
| O | 0.6019403778  | 0.8609858054  | 0.6390273075  |
| O | 1.8963257395  | 0.7293519515  | 0.0991856415  |
| O | 1.2912987958  | 0.5291577799  | -2.5064412287 |
| H | 1.2864201973  | 1.4006661964  | -2.9090573386 |
| H | 1.6147713792  | 0.6590947605  | -1.5772883944 |
| O | -0.9977138097 | -0.8069041455 | -1.8152352085 |
| H | -0.2324515879 | -0.3198040055 | -2.1937106906 |
| H | -1.124106831  | -1.5681332631 | -2.3863466462 |
| C | -1.4306206652 | -0.1191422973 | 1.3316709473  |
| H | -2.0959932403 | -0.4099682112 | 0.513521496   |
| H | -1.6582243524 | 0.9114021023  | 1.5997013581  |
| C | -1.6190384663 | -1.0722712035 | 2.5239542656  |
| H | -0.9794580514 | -0.7943690599 | 3.3606645412  |
| H | -2.6533075886 | -1.036255422  | 2.8614687671  |
| H | -1.3929678167 | -2.1021326032 | 2.2480130636  |



*syn\_Anti*-CH<sub>3</sub>CH<sub>2</sub>CHOO

|   |               |               |               |
|---|---------------|---------------|---------------|
| C | 0.4590277461  | 0.7016376474  | -0.0000045665 |
| H | 0.7752487291  | 1.7390946601  | -0.0000100892 |
| O | -0.7956550381 | 0.571062864   | -0.0000039028 |
| O | -1.2946539029 | -0.7042639881 | 0.0000029089  |
| C | 1.3737903168  | -0.4493578945 | 0.0000015794  |
| H | 1.0986870578  | -1.0748339813 | 0.8579745518  |
| H | 1.0986869593  | -1.0748432256 | -0.8579646223 |
| C | 2.8523785335  | -0.0668466875 | -0.0000005605 |
| H | 3.4738323765  | -0.960419438  | 0.0000042299  |
| H | 3.115014563   | 0.5174157603  | -0.8823621822 |
| H | 3.1150146588  | 0.5174252832  | 0.8823547285  |

*syn\_Gauche*-CH<sub>3</sub>CH<sub>2</sub>CHOO 1a TS

|   |               |               |               |
|---|---------------|---------------|---------------|
| C | 0.8346387447  | 0.2719532693  | 0.1867524321  |
| H | 1.7051310712  | -0.1747984924 | -0.2910111377 |
| O | -0.2450323545 | -0.3634862649 | -0.1024791282 |
| O | -1.3722868507 | 0.5370337599  | 0.1322275901  |
| O | 0.3822053716  | 1.7625094903  | -1.0197100577 |
| H | -0.5926874149 | 1.4718108114  | -0.6333074881 |
| H | 0.5863458254  | 2.627978897   | -0.6522599059 |
| C | 1.0604496693  | 1.0042691691  | 1.4729630063  |
| H | 0.1817496107  | 1.5868419774  | 1.7303081543  |
| H | 1.1233528651  | 0.1988139344  | 2.2164329747  |
| C | 2.3502143425  | 1.8226551406  | 1.5047408351  |
| H | 2.5170869256  | 2.221215736   | 2.5039735528  |
| H | 3.2181045159  | 1.2165328858  | 1.2410265979  |
| H | 2.3175586781  | 2.6664456862  | 0.8157105744  |

*syn\_Gauche*-CH<sub>3</sub>CH<sub>2</sub>CHOO 1a vdW

|   |               |               |               |
|---|---------------|---------------|---------------|
| C | 0.5077751128  | -0.9368769955 | 0.2211171116  |
| H | 1.2875740036  | -1.683267757  | 0.100958272   |
| O | -0.5846375554 | -1.3082297664 | -0.2803408539 |
| O | -1.6567712395 | -0.4330731247 | -0.1955864506 |
| O | -0.6337042594 | 1.5815280489  | -1.7861406135 |
| H | -1.1767101079 | 0.913049231   | -1.3205568341 |
| H | -1.0798318407 | 1.7592285574  | -2.6168674652 |
| C | 0.7109204885  | 0.3490389134  | 0.9010875072  |
| H | 0.5891502376  | 1.1329446945  | 0.1421992409  |
| H | -0.1464619305 | 0.4943994847  | 1.5671922195  |
| C | 2.0563886089  | 0.4557715779  | 1.6180269303  |
| H | 2.1512662994  | 1.4320611483  | 2.0892399376  |
| H | 2.1595583503  | -0.2995171244 | 2.3974723964  |

|   |              |             |              |
|---|--------------|-------------|--------------|
| H | 2.8893888323 | 0.344115112 | 0.9234056019 |
|---|--------------|-------------|--------------|

*syn\_Gauche*-CH<sub>3</sub>CH<sub>2</sub>CHOO 1b TS

|   |               |               |               |
|---|---------------|---------------|---------------|
| C | 0.8387108993  | 0.2348478676  | 0.192277714   |
| H | 1.7172977501  | -0.2217006076 | -0.2634193038 |
| O | -0.2382482828 | -0.4027837041 | -0.1102783992 |
| O | -1.3677398268 | 0.4975997217  | 0.10161906    |
| O | 0.3999058772  | 1.8217039863  | -0.9208232835 |
| H | -0.5768720132 | 1.4738487333  | -0.5809051849 |
| H | 0.46739958    | 1.5621493516  | -1.8466002849 |
| C | 1.050986799   | 1.0005379365  | 1.4575305221  |
| H | 0.1771177304  | 1.6037559248  | 1.6791184031  |
| H | 1.0952779     | 0.2179988585  | 2.2269367899  |
| C | 2.3411321755  | 1.8173436106  | 1.4662090346  |
| H | 2.4955628309  | 2.2629403561  | 2.4475990432  |
| H | 3.2125471335  | 1.1977853516  | 1.2458181194  |
| H | 2.2946854469  | 2.616832613   | 0.73029577    |

*syn\_Gauche*-CH<sub>3</sub>CH<sub>2</sub>CHOO 1b vdW

|   |               |               |               |
|---|---------------|---------------|---------------|
| C | 0.5125540805  | -0.9319308002 | 0.2300069757  |
| H | 1.2973747683  | -1.6743702825 | 0.1183654731  |
| O | -0.5755492698 | -1.3136029832 | -0.273069965  |
| O | -1.6533420853 | -0.4444547241 | -0.1989264306 |
| O | -0.636232574  | 1.5648267748  | -1.799996749  |
| H | -1.17700639   | 0.896413453   | -1.3317289837 |
| H | -1.0800979166 | 1.7337627302  | -2.6337584651 |
| C | 0.7051087974  | 0.3600957091  | 0.9014214755  |
| H | 0.5815949842  | 1.1377263104  | 0.1363838009  |
| H | -0.1558105254 | 0.5050062671  | 1.5630472559  |
| C | 2.0470133153  | 0.4802735329  | 1.6228977866  |
| H | 2.1340320515  | 1.460511721   | 2.0873820416  |
| H | 2.1516702485  | -0.2687070473 | 2.4082099958  |
| H | 2.8834595156  | 0.3687103386  | 0.9324147883  |

*syn\_Anti*-CH<sub>3</sub>CH<sub>2</sub>CHOO 2a TS

|   |               |               |               |
|---|---------------|---------------|---------------|
| C | 1.3668941883  | -0.2951262821 | -0.4346505338 |
| H | 0.6158218617  | -0.5742432161 | 0.2992528352  |
| O | 1.8323359155  | 0.8800375119  | -0.1715729743 |
| O | 2.9449690164  | 1.2627353774  | -1.0295308082 |
| O | 0.1424237023  | -0.0868115195 | -1.8520091584 |
| H | -0.6267311449 | 0.3643565749  | -1.4853676487 |
| H | 0.6758529024  | 0.6665660925  | -2.4434133967 |
| O | 1.4799999767  | 1.6533072742  | -2.9371061922 |
| H | 2.2434952388  | 1.5657098065  | -2.1203451126 |

|   |              |               |               |
|---|--------------|---------------|---------------|
| H | 1.8945636933 | 1.462213301   | -3.7815264701 |
| C | 2.2136373119 | -1.3882274323 | -1.0083883012 |
| H | 2.5637736823 | -1.0967336486 | -1.9946273789 |
| H | 3.1068696585 | -1.4122740257 | -0.3771922332 |
| C | 1.5119865625 | -2.7441588267 | -1.0318085382 |
| H | 2.1904283069 | -3.5118663732 | -1.4011365615 |
| H | 1.1881073368 | -3.0459624926 | -0.0342216516 |
| H | 0.6392417907 | -2.7226591215 | -1.6818718756 |

*syn*\_Anti-CH<sub>3</sub>CH<sub>2</sub>CHO 2a vdW

|   |               |               |               |
|---|---------------|---------------|---------------|
| C | -0.010446393  | -0.3543119791 | 1.1105352044  |
| H | -0.8584480118 | -0.5239874211 | 1.7652974097  |
| O | 0.3758574132  | 0.8393496078  | 1.1238310236  |
| O | 1.454982089   | 1.1578756865  | 0.2902369885  |
| O | -1.8887032511 | -0.091295518  | -1.0083932918 |
| H | -2.8072290691 | 0.1851957529  | -1.0458879914 |
| H | -1.3735431274 | 0.663342556   | -1.3632921153 |
| O | -0.1882993662 | 1.9895751601  | -1.718594836  |
| H | 0.5097910743  | 1.8179851729  | -1.0416263839 |
| H | 0.2645118127  | 2.0437057093  | -2.5631816446 |
| C | 0.6358818967  | -1.4191467282 | 0.3303431286  |
| H | 0.6715573438  | -1.0762116407 | -0.7066987827 |
| H | 1.6880500146  | -1.4365076053 | 0.6396328159  |
| C | -0.0479821791 | -2.7767313717 | 0.4670668097  |
| H | 0.4868626285  | -3.5267361128 | -0.1127905425 |
| H | -0.0698427714 | -3.1154142756 | 1.5036659734  |
| H | -1.0699691036 | -2.7303429928 | 0.0943342342  |

*syn*\_Anti-CH<sub>3</sub>CH<sub>2</sub>CHO 2b TS

|   |              |               |               |
|---|--------------|---------------|---------------|
| C | 2.0289791099 | -1.3309849479 | -0.7107613131 |
| H | 1.0773736359 | -1.2828281479 | -0.1913732919 |
| O | 2.7113766745 | -0.2588450611 | -0.4918363245 |
| O | 4.0484403189 | -0.3075423192 | -1.0714294151 |
| O | 3.2019456649 | 0.1419046428  | -3.3072250914 |
| H | 3.0934021971 | 1.0794798411  | -3.4846449772 |
| H | 3.704564953  | 0.0205878782  | -2.3149276041 |
| O | 1.2537360725 | -1.0277798984 | -2.3977334675 |
| H | 2.0580146453 | -0.4652537215 | -2.8940978794 |
| H | 1.1287767305 | -1.8453338394 | -2.8917167158 |
| C | 2.6826455134 | -2.6709897554 | -0.8641216149 |
| H | 3.326906757  | -2.7659406513 | 0.0152553638  |
| H | 3.3593840246 | -2.6522788822 | -1.7140115065 |
| C | 1.6928420494 | -3.833216171  | -0.930602677  |
| H | 1.0699343544 | -3.7995143733 | -1.8257338751 |

|   |              |               |               |
|---|--------------|---------------|---------------|
| H | 2.228465033  | -4.7809689203 | -0.9478715565 |
| H | 1.0269392657 | -3.8454996731 | -0.0667510538 |

*syn\_Anti-CH<sub>3</sub>CH<sub>2</sub>CHOO 2b vdW*

|   |               |               |               |
|---|---------------|---------------|---------------|
| C | -0.3821435612 | -0.1841159241 | 1.0779768519  |
| H | -1.3904491598 | -0.0785597403 | 1.4637471844  |
| O | 0.2373594076  | 0.9060921216  | 1.0466471958  |
| O | 1.540473863   | 0.8700353052  | 0.5339857184  |
| O | 0.7830654684  | 1.5872690817  | -1.9767309821 |
| H | 0.8271812647  | 2.538933343   | -2.0962627491 |
| H | 1.1884676722  | 1.407740209   | -1.094100982  |
| O | -1.6199114484 | 0.2948455224  | -1.4173186133 |
| H | -0.8447164473 | 0.8086863822  | -1.7262368332 |
| H | -2.0579359285 | -0.0179100383 | -2.2118928955 |
| C | 0.2000000493  | -1.4673619528 | 0.6612260757  |
| H | 1.1161851192  | -1.6020520102 | 1.2484957971  |
| H | 0.5623599773  | -1.3296385843 | -0.3612262288 |
| C | -0.7640616915 | -2.6443549404 | 0.7837784936  |
| H | -1.6413584192 | -2.4942721719 | 0.155864441   |
| H | -0.2771152687 | -3.5641223039 | 0.4649929352  |
| H | -1.0978668971 | -2.7872122989 | 1.8121345909  |

*syn\_Anti-CH<sub>3</sub>CH<sub>2</sub>CHOO 2c TS*

|   |              |               |               |
|---|--------------|---------------|---------------|
| C | 1.3806002198 | -0.3150783062 | -0.4907435623 |
| H | 0.6096649803 | -0.5270849015 | 0.2433435657  |
| O | 1.8811204771 | 0.8557683949  | -0.2818553209 |
| O | 2.9852516564 | 1.1685045135  | -1.1814539786 |
| O | 0.1635662962 | -0.0467438263 | -1.8804650783 |
| H | 0.1213710967 | -0.8108151657 | -2.4650148138 |
| H | 0.6354333174 | 0.7806487801  | -2.4345821458 |
| O | 1.3748746481 | 1.8310661119  | -2.8823249819 |
| H | 2.2159796609 | 1.6332750944  | -2.1714393396 |
| H | 1.7024626241 | 1.7639440412  | -3.7820040677 |
| C | 2.2188792292 | -1.4605658719 | -0.9755127417 |
| H | 2.6515049477 | -1.2127250772 | -1.9408366729 |
| H | 3.0641032043 | -1.4963772522 | -0.2816450375 |
| C | 1.4835269318 | -2.8001041366 | -0.9884854384 |
| H | 2.1687973498 | -3.601943489  | -1.2587278394 |
| H | 1.0650383253 | -3.0387832187 | -0.0099424057 |
| H | 0.6641280349 | -2.8203806907 | -1.7088231411 |

*syn\_Anti-CH<sub>3</sub>CH<sub>2</sub>CHOO 2c vdW*

|   |               |               |              |
|---|---------------|---------------|--------------|
| C | -0.0081646273 | -0.3573580879 | 1.1206567325 |
| H | -0.8520543393 | -0.5323014725 | 1.7793339892 |

|   |               |               |               |
|---|---------------|---------------|---------------|
| O | 0.3735847589  | 0.8377489956  | 1.1355569821  |
| O | 1.4470782791  | 1.1629786869  | 0.2972935201  |
| O | -1.8985090886 | -0.0952303104 | -0.9876133867 |
| H | -2.8182850516 | 0.1777900167  | -1.0194726389 |
| H | -1.3881453286 | 0.6624799607  | -1.3428966016 |
| O | -0.2099274055 | 1.9943760164  | -1.700358097  |
| H | 0.4923621758  | 1.8234420517  | -1.0275797324 |
| H | 0.2382347197  | 2.0528222153  | -2.5471341509 |
| C | 0.6381706594  | -1.4173145082 | 0.3338552248  |
| H | 0.6670826623  | -1.0711087663 | -0.7023101594 |
| H | 1.6920055584  | -1.4315307566 | 0.6375812477  |
| C | -0.0397188221 | -2.7779482088 | 0.4700217723  |
| H | 0.4949740231  | -3.5241174128 | -0.1149018625 |
| H | -0.0548403201 | -3.119843933  | 1.5056861119  |
| H | -1.0638158535 | -2.7343974866 | 0.1027790487  |

*syn*\_Anti-CH<sub>3</sub>CH<sub>2</sub>CHOO 2d TS

|   |              |               |               |
|---|--------------|---------------|---------------|
| C | 1.9951220917 | -1.295228178  | -0.6401119667 |
| H | 1.0594016014 | -1.328598961  | -0.0893756092 |
| O | 2.6374866807 | -0.2085473892 | -0.3647985885 |
| O | 3.9756807185 | -0.1677817411 | -0.935933317  |
| O | 3.2452920328 | -0.1180963784 | -3.2523701172 |
| H | 3.2543839328 | 0.756054679   | -3.6488063152 |
| H | 3.6778575455 | -0.0612410306 | -2.2094291501 |
| O | 1.1699709176 | -1.0215805154 | -2.3174147506 |
| H | 2.0182868633 | -0.5757679377 | -2.8464581892 |
| H | 0.5317772818 | -0.3136082387 | -2.1749342331 |
| C | 2.6854858597 | -2.5935831836 | -0.9180967577 |
| H | 3.3994342708 | -2.7122694259 | -0.0975695151 |
| H | 3.2889230624 | -2.5024523398 | -1.8173524646 |
| C | 1.7255914936 | -3.7785575279 | -0.9986632647 |
| H | 1.035182502  | -3.6673056621 | -1.8326881853 |
| H | 2.2832259537 | -4.7027762324 | -1.1425572377 |
| H | 1.1419781917 | -3.886680937  | -0.082714338  |

*syn*\_Anti-CH<sub>3</sub>CH<sub>2</sub>CHOO 2d vdW

|   |               |               |               |
|---|---------------|---------------|---------------|
| C | -0.2939097227 | -0.1761045362 | 1.0731779809  |
| H | -1.2660794732 | -0.0309030826 | 1.5319186507  |
| O | 0.3794048745  | 0.8812263147  | 1.0282601859  |
| O | 1.6402162463  | 0.7941910432  | 0.4241000617  |
| O | 0.750748681   | 1.6275039733  | -2.0061752618 |
| H | 0.8373818565  | 2.5789043268  | -2.1022531844 |
| H | 1.2059275338  | 1.3998721698  | -1.1596453656 |
| O | -1.6735886292 | 0.4436134544  | -1.3143727591 |

|   |               |               |               |
|---|---------------|---------------|---------------|
| H | -0.8951862979 | 0.9262760275  | -1.6629649534 |
| H | -2.1815458636 | 0.1787927303  | -2.084359216  |
| C | 0.188563784   | -1.4739629418 | 0.5811667668  |
| H | 1.1345843456  | -1.6738953879 | 1.0983651225  |
| H | 0.4863173594  | -1.3232022988 | -0.4601280053 |
| C | -0.8263383565 | -2.6030403295 | 0.7389787655  |
| H | -1.7356009044 | -2.3884747655 | 0.1789310721  |
| H | -0.4124834112 | -3.5362411317 | 0.3613899902  |
| H | -1.0955150225 | -2.760578566  | 1.7840031494  |

*syn\_Gauche*-CH<sub>3</sub>CH<sub>2</sub>CHOO

|   |               |               |               |
|---|---------------|---------------|---------------|
| C | -0.2629084038 | 0.6813921044  | -0.0125437943 |
| H | -0.019853914  | 1.7100875609  | -0.2533627237 |
| O | -1.4714169073 | 0.5414980602  | 0.3235101314  |
| O | -1.9130552055 | -0.7132568716 | 0.6479168881  |
| C | 0.6963201785  | -0.4367523012 | -0.0701975644 |
| H | 0.5280377362  | -1.0493308257 | 0.8185729236  |
| H | 1.7075725763  | -0.0315961875 | -0.050349641  |
| C | 0.4920566328  | -1.3186856471 | -1.3242362579 |
| H | 1.1980964482  | -2.1471985736 | -1.2992354914 |
| H | -0.5172798591 | -1.7208216348 | -1.3395966515 |
| H | 0.6656578378  | -0.7515532739 | -2.2380165389 |

*syn\_Gauche*-CH<sub>3</sub>CH<sub>2</sub>CHOO 1a TS

|   |               |               |               |
|---|---------------|---------------|---------------|
| C | 0.8010967264  | 0.2406027833  | 0.2196452692  |
| H | 1.7070196921  | -0.2502100662 | -0.1323159976 |
| O | -0.2471519005 | -0.3720874014 | -0.2019326748 |
| O | -1.3661553838 | 0.5643737479  | -0.2133553472 |
| O | 0.5849140898  | 1.7154858626  | -1.0966258076 |
| H | -0.440323793  | 1.45674063    | -0.8722246527 |
| H | 0.7472727669  | 2.5837336675  | -0.7152476239 |
| C | 0.9671882072  | 0.9936304544  | 1.5060155526  |
| H | 1.8459025157  | 1.6318098578  | 1.3843338792  |
| H | 1.2947929962  | 0.2031783482  | 2.1967240485  |
| C | -0.196209964  | 1.7566344277  | 2.1328180671  |
| H | -1.0608765338 | 1.1156071196  | 2.2704338114  |
| H | 0.1194718569  | 2.1447233653  | 3.1023213511  |
| H | -0.5111202762 | 2.5962222031  | 1.5172581248  |

*syn\_Gauche*-CH<sub>3</sub>CH<sub>2</sub>CHOO 1a vdW

|   |               |               |               |
|---|---------------|---------------|---------------|
| C | 0.5279346172  | -1.0433896317 | 0.422425232   |
| H | 1.0998032502  | -1.9509029973 | 0.5887264076  |
| O | -0.4101070813 | -1.2309703193 | -0.3947623644 |
| O | -1.2327150798 | -0.159340796  | -0.7025734205 |

|   |               |               |               |
|---|---------------|---------------|---------------|
| O | 0.6283554848  | 1.3981563885  | -2.0399565813 |
| H | -0.1548326813 | 0.903465609   | -1.726631594  |
| H | 0.4612391412  | 1.6033872279  | -2.9622535342 |
| C | 0.8168931471  | 0.2347176528  | 1.0969219326  |
| H | 0.8006646248  | 1.023672973   | 0.3427959755  |
| H | 1.8176802352  | 0.1750400591  | 1.5228153453  |
| C | -0.2210925874 | 0.5545499551  | 2.1995194894  |
| H | -0.2122659602 | -0.2006116849 | 2.9846912801  |
| H | 0.0277330001  | 1.5143611163  | 2.6485243661  |
| H | -1.2183151105 | 0.6150784474  | 1.7729564657  |

*syn\_Gauche*-CH<sub>3</sub>CH<sub>2</sub>CHOO 1b TS

|   |               |               |               |
|---|---------------|---------------|---------------|
| C | 0.7983252892  | 0.2149544508  | 0.2086477098  |
| H | 1.707671769   | -0.2770861597 | -0.136525256  |
| O | -0.2468277569 | -0.4034252596 | -0.2181739244 |
| O | -1.3707388412 | 0.524666642   | -0.2273900951 |
| O | 0.5559559235  | 1.7967819106  | -0.9969936105 |
| H | -0.4605253792 | 1.4722684966  | -0.806752794  |
| H | 0.7603821167  | 1.514152968   | -1.8952642072 |
| C | 0.9664274504  | 0.9861578535  | 1.4803986709  |
| H | 1.8346916501  | 1.6301428302  | 1.3313165323  |
| H | 1.3016929871  | 0.2077374011  | 2.1818005229  |
| C | -0.1935423029 | 1.7628402344  | 2.0955615748  |
| H | -1.0611221305 | 1.1294304256  | 2.2508718748  |
| H | 0.1283366051  | 2.1663299082  | 3.0567877769  |
| H | -0.4940073805 | 2.5920132984  | 1.4609842248  |

*syn\_Gauche*-CH<sub>3</sub>CH<sub>2</sub>CHOO 1b vdW

|   |               |               |               |
|---|---------------|---------------|---------------|
| C | 0.5446592158  | -1.0344646132 | 0.4248373415  |
| H | 1.130719091   | -1.9325548174 | 0.5928793715  |
| O | -0.3913191769 | -1.2387658434 | -0.3907052663 |
| O | -1.2307975169 | -0.1808475376 | -0.7003927917 |
| O | 0.6043423068  | 1.4016814908  | -2.0442077935 |
| H | -0.1707171783 | 0.8957626691  | -1.7286065321 |
| H | 0.4329849505  | 1.6018053796  | -2.9668487451 |
| C | 0.8145637098  | 0.2497846993  | 1.0955506338  |
| H | 0.7852258069  | 1.0363532249  | 0.3393303812  |
| H | 1.8166537559  | 0.2067731587  | 1.5203881977  |
| C | -0.2269620299 | 0.556472469   | 2.1985443673  |
| H | -0.2055125666 | -0.1963373971 | 2.9857285725  |
| H | 0.0074835302  | 1.5212338256  | 2.6446697062  |
| H | -1.2255018984 | 0.6003882917  | 1.7730305572  |

*syn\_Gauche*-CH<sub>3</sub>CH<sub>2</sub>CHOO 1a' TS

|   |               |               |               |
|---|---------------|---------------|---------------|
| C | 0.832604517   | 0.2378067297  | 0.2093670995  |
| H | 1.6910019194  | -0.2433033037 | -0.255644797  |
| O | -0.2713514668 | -0.3210402349 | -0.1436670127 |
| O | -1.3533353895 | 0.6293918624  | 0.0944219942  |
| O | 0.5126412566  | 1.8140305204  | -0.9231231253 |
| H | -0.4894696552 | 1.5642644115  | -0.5924946859 |
| H | 0.7588753332  | 2.6341231586  | -0.4837339189 |
| C | 1.0515172113  | 0.9012795928  | 1.53355451    |
| H | 1.9124741314  | 1.565193265   | 1.4520485318  |
| H | 0.1734688725  | 1.4783936303  | 1.8045023754  |
| C | 1.3287153682  | -0.1836071862 | 2.5911949742  |
| H | 1.5358054984  | 0.2881866925  | 3.5506878515  |
| H | 0.4654585608  | -0.8358717706 | 2.7097647674  |
| H | 2.1908138426  | -0.7972153678 | 2.3268754358  |

*syn\_Gauche*-CH<sub>3</sub>CH<sub>2</sub>CHOO 1a' vdW

|   |               |               |               |
|---|---------------|---------------|---------------|
| C | 0.2077903406  | -1.0635607572 | 0.1091495096  |
| H | 0.8156002111  | -1.9592598989 | 0.0201887072  |
| O | -0.7193978581 | -1.0339980929 | -0.7406606461 |
| O | -1.5602524327 | 0.0684604473  | -0.7306552452 |
| O | 0.3046389088  | 1.9793102478  | -1.4419701376 |
| H | -0.4827517725 | 1.4108470179  | -1.3180627375 |
| H | 0.1926298599  | 2.4126538813  | -2.29072309   |
| C | 0.4415588101  | -0.0188820843 | 1.1147372701  |
| H | 0.7306002558  | 0.8888918818  | 0.5691652017  |
| H | -0.5346646457 | 0.2330487169  | 1.5430463513  |
| C | 1.4803371592  | -0.4047633469 | 2.1672171293  |
| H | 1.6172226855  | 0.4121962528  | 2.8729253851  |
| H | 1.1733680417  | -1.2840202219 | 2.7340660232  |
| H | 2.4499554363  | -0.6132310437 | 1.7141862788  |

*syn\_Gauche*-CH<sub>3</sub>CH<sub>2</sub>CHOO 1b' TS

|   |               |               |               |
|---|---------------|---------------|---------------|
| C | 0.8283948923  | 0.19441097    | 0.1972143196  |
| H | 1.6871147646  | -0.3019870289 | -0.2536242428 |
| O | -0.2781625399 | -0.3639861666 | -0.1557286968 |
| O | -1.3561447343 | 0.5922635377  | 0.0691502834  |
| O | 0.5216051691  | 1.8509172729  | -0.8433939787 |
| H | -0.4814622165 | 1.5592262428  | -0.5477728237 |
| H | 0.5952645503  | 1.6310543383  | -1.77913586   |
| C | 1.051387428   | 0.89040593    | 1.5001801981  |
| H | 1.9078981107  | 1.552790446   | 1.3888191426  |
| H | 0.180308629   | 1.4845276711  | 1.7536994629  |
| C | 1.3243813188  | -0.1673138496 | 2.5855401673  |
| H | 1.5353627116  | 0.3309658284  | 3.5306763068  |



|   |              |               |              |
|---|--------------|---------------|--------------|
| H | 0.4595343596 | -0.8134601803 | 2.7263564606 |
| H | 2.1841975567 | -0.7921400118 | 2.3393162608 |

*syn\_Gauche*-CH<sub>3</sub>CH<sub>2</sub>CHOO 1b' vdW

|   |               |               |               |
|---|---------------|---------------|---------------|
| C | 0.2129849603  | -1.0609025965 | 0.1217865417  |
| H | 0.82567018    | -1.9543802243 | 0.0447271394  |
| O | -0.7118108187 | -1.0457481449 | -0.7310041638 |
| O | -1.5583692248 | 0.0523713361  | -0.73591078   |
| O | 0.2987466274  | 1.9647355104  | -1.4633234011 |
| H | -0.4860653184 | 1.3936245774  | -1.33530087   |
| H | 0.1870331303  | 2.3878843211  | -2.3172434937 |
| C | 0.4383671355  | -0.0037425868 | 1.1161822798  |
| H | 0.7243410618  | 0.8993066587  | 0.5612334462  |
| H | -0.5404132365 | 0.2479311032  | 1.5387691417  |
| C | 1.4759879908  | -0.3723222824 | 2.1759796694  |
| H | 1.6065547072  | 0.4532477215  | 2.8728091171  |
| H | 1.1718769811  | -1.246710461  | 2.7518287106  |
| H | 2.4480128238  | -0.5808479324 | 1.7281626626  |

*syn\_Gauche*-CH<sub>3</sub>CH<sub>2</sub>CHOO 2a TS

|   |               |               |               |
|---|---------------|---------------|---------------|
| C | 1.4277680884  | -0.2822448272 | -0.3692971567 |
| H | 0.7037813754  | -0.5578331003 | 0.3926216942  |
| O | 1.8352057651  | 0.9287655659  | -0.1733248307 |
| O | 2.910157756   | 1.3348240344  | -1.0701577488 |
| O | 0.193434382   | -0.2243308368 | -1.7767373442 |
| H | -0.5928229044 | 0.2119988333  | -1.4281707373 |
| H | 0.6714876339  | 0.5091219719  | -2.422940282  |
| O | 1.4142791028  | 1.5222924724  | -2.9943663321 |
| H | 2.1742285295  | 1.5336897453  | -2.1867961628 |
| H | 1.8428255487  | 1.3043507913  | -3.8252399476 |
| C | 2.3225252872  | -1.3649114106 | -0.8879706739 |
| H | 1.7106440884  | -2.2471485916 | -1.0665823416 |
| H | 2.7611295875  | -1.0499934046 | -1.8297400969 |
| C | 3.4309110093  | -1.6577562389 | 0.1351933611  |
| H | 4.0600397398  | -2.4681126288 | -0.2306259098 |
| H | 4.0511768572  | -0.7769894309 | 0.2846134372  |
| H | 3.0202361533  | -1.9648149448 | 1.0980730719  |

*syn\_Gauche*-CH<sub>3</sub>CH<sub>2</sub>CHOO 2a vdW

|   |               |               |               |
|---|---------------|---------------|---------------|
| C | -0.2794641617 | -0.3526134007 | 1.0642609307  |
| H | -1.122415551  | -0.4739580317 | 1.7352382987  |
| O | 0.0547041024  | 0.8506005511  | 0.9390218037  |
| O | 1.1297065901  | 1.1363484237  | 0.0845866996  |
| O | -2.0948054603 | -0.4473849366 | -1.0491317995 |

|   |               |               |               |
|---|---------------|---------------|---------------|
| H | -3.0230209069 | -0.2040496003 | -1.0797506559 |
| H | -1.6196023936 | 0.2780141577  | -1.5063704099 |
| O | -0.51636031   | 1.6186169742  | -2.0279706932 |
| H | 0.1770976275  | 1.572859676   | -1.325717839  |
| H | -0.0519379227 | 1.5837026061  | -2.8672246912 |
| C | 0.4260095781  | -1.4871582917 | 0.4440642528  |
| H | -0.2533417548 | -2.3362936589 | 0.4149965398  |
| H | 0.6893388107  | -1.2013857458 | -0.5723846657 |
| C | 1.7124367551  | -1.8313995329 | 1.2310447086  |
| H | 2.2136006881  | -2.6656102939 | 0.7430247805  |
| H | 2.3873177354  | -0.9792812091 | 1.2451272278  |
| H | 1.4884915736  | -2.1255936874 | 2.2560585122  |

*syn\_Gauche*-CH<sub>3</sub>CH<sub>2</sub>CHOO 2b TS

|   |              |               |               |
|---|--------------|---------------|---------------|
| C | 2.0828443591 | -1.4181766697 | -0.7309183397 |
| H | 1.1489306825 | -1.3341624785 | -0.1848861683 |
| O | 2.7950763495 | -0.3564221964 | -0.5526303473 |
| O | 4.1094671794 | -0.4337707384 | -1.1823862732 |
| O | 3.1784330028 | 0.0454646724  | -3.3860115602 |
| H | 3.0589387571 | 0.9850773103  | -3.5445789795 |
| H | 3.7165586629 | -0.0842239273 | -2.4287060654 |
| O | 1.2837751039 | -1.1651890696 | -2.4041859401 |
| H | 2.0507321412 | -0.5876164599 | -2.9251723984 |
| H | 1.193383042  | -2.0010923045 | -2.8749875712 |
| C | 2.696376292  | -2.7795503558 | -0.8652749754 |
| H | 1.9045168037 | -3.4892229632 | -1.1091903761 |
| H | 3.4273106673 | -2.7670100736 | -1.6683186293 |
| C | 3.3775616929 | -3.1755628082 | 0.4547006559  |
| H | 3.7914217933 | -4.179019235  | 0.3657150928  |
| H | 4.186550466  | -2.4848341058 | 0.6803778548  |
| H | 2.6734940042 | -3.1767995967 | 1.2876440204  |

*syn\_Gauche*-CH<sub>3</sub>CH<sub>2</sub>CHOO 2b vdW

|   |               |               |               |
|---|---------------|---------------|---------------|
| C | -0.6374475824 | -0.1764979883 | 0.956506209   |
| H | -1.6362713788 | -0.0155448456 | 1.3459758934  |
| O | 0.0045724522  | 0.8954163865  | 0.8445452305  |
| O | 1.3079262081  | 0.8146291982  | 0.3293468074  |
| O | 0.5233253102  | 1.3342839801  | -2.2151332144 |
| H | 0.5735013604  | 2.2712002967  | -2.4188578473 |
| H | 0.941040527   | 1.22761317    | -1.325645968  |
| O | -1.8786793451 | 0.1353780926  | -1.4875232061 |
| H | -1.1020916868 | 0.6050072653  | -1.8586374545 |
| H | -2.243708303  | -0.3748554997 | -2.2140605464 |
| C | -0.0891640701 | -1.5113087954 | 0.6597654022  |

|   |               |               |               |
|---|---------------|---------------|---------------|
| H | -0.9212805092 | -2.1958068007 | 0.5066575456  |
| H | 0.4939942705  | -1.4348679208 | -0.2562971732 |
| C | 0.8232254007  | -2.0023086395 | 1.8084921993  |
| H | 1.2182460717  | -2.9838888673 | 1.5523338566  |
| H | 1.6555351692  | -1.3173355547 | 1.9482932309  |
| H | 0.2740081053  | -2.0931444774 | 2.745164035   |

*syn\_Gauche*-CH<sub>3</sub>CH<sub>2</sub>CHOO 2c TS

|   |              |                          |               |
|---|--------------|--------------------------|---------------|
| C | 1.4656094531 | -0.3179858024            | -0.4321224859 |
| H | 0.7190188096 | -0.5177497175            | 0.3297958585  |
| O | 1.9077003315 | 0.8894032619             | -0.3069098615 |
| O | 2.970267104  | 1.2100791935             | -1.2544299127 |
| O | 0.2380978592 | -0.2301625877            | -1.8226906147 |
| H | 0.2878422268 | -1.0251875515            | -2.3642486775 |
| H | 0.6230367355 | 0.6026595323             | -2.4205826098 |
| O | 1.27191543   | 1.6956531915             | -2.9384840718 |
| H | 2.1364452604 | 1.588145878              | -2.254511458  |
| H | 1.580151992  | 1.6195510553             | -3.8443064674 |
| C | 2.3541866583 | -1.4524966564            | -0.8498339452 |
| H | 1.7368953289 | -2.3427809481            | -0.9796728828 |
| H | 2.8324646681 | -1.2046113121            | -1.7928368519 |
| C | 3.4231282528 | -1.699161892             | 0.2264639301  |
| H | 4.0457480513 | -2.5450449 -0.0617365857 |               |
| H | 4.0566394967 | -0.8216702772            | 0.3329561712  |
| H | 2.9753333418 | -1.9278854677            | 1.1942254652  |

*syn\_Gauche*-CH<sub>3</sub>CH<sub>2</sub>CHOO 2c vdW

|   |               |               |               |
|---|---------------|---------------|---------------|
| C | -0.287275349  | -0.3591690211 | 1.0785389723  |
| H | -1.1321104763 | -0.4968307283 | 1.7439755117  |
| O | 0.0286246523  | 0.8497126254  | 0.9606846068  |
| O | 1.1039574055  | 1.1562450316  | 0.1139026105  |
| O | -2.0885356871 | -0.4727765374 | -1.0459454013 |
| H | -3.0202748023 | -0.2439293744 | -1.0809415941 |
| H | -1.6221626881 | 0.2620991365  | -1.4971021226 |
| O | -0.5371612607 | 1.6222844568  | -2.0061289084 |
| H | 0.1528323441  | 1.584200332   | -1.3000155742 |
| H | -0.067369461  | 1.5985747575  | -2.8427816511 |
| C | 0.4395869058  | -1.4796237108 | 0.4574252977  |
| H | -0.2261217316 | -2.3391964344 | 0.4205355778  |
| H | 0.7043027183  | -1.1850887169 | -0.5561582288 |
| C | 1.7266683702  | -1.8071947806 | 1.2504294486  |
| H | 2.2437497889  | -2.631172689  | 0.7616314102  |
| H | 2.3879461229  | -0.9446402194 | 1.2723240556  |
| H | 1.5014131481  | -2.1095731274 | 2.2727709895  |

*syn\_Gauche*-CH<sub>3</sub>CH<sub>2</sub>CHOO 2d TS

|   |              |               |               |
|---|--------------|---------------|---------------|
| C | 1.9998346363 | -1.3891072928 | -0.6958113613 |
| H | 1.0610407615 | -1.4171432416 | -0.1499331162 |
| O | 2.6299600535 | -0.2900501135 | -0.4349394123 |
| O | 3.971641988  | -0.2347325863 | -1.0008616734 |
| O | 3.2710292775 | -0.2527877647 | -3.3339781887 |
| H | 3.266387113  | 0.6133389523  | -3.7478287477 |
| H | 3.6833113905 | -0.161717389  | -2.3000116532 |
| O | 1.2041531899 | -1.1745308059 | -2.3817809305 |
| H | 2.0414323411 | -0.7354559383 | -2.9190272704 |
| H | 0.5565909595 | -0.4695892743 | -2.2674553956 |
| C | 2.6985427405 | -2.6922585967 | -0.9295594377 |
| H | 1.9493816299 | -3.4196876688 | -1.2367701594 |
| H | 3.4202206381 | -2.5803930727 | -1.7330377008 |
| C | 3.4077547287 | -3.139769909  | 0.3583321395  |
| H | 3.8858804731 | -4.1042448766 | 0.1930483237  |
| H | 4.1707523561 | -2.4184001479 | 0.6414254754  |
| H | 2.7071167229 | -3.2536742743 | 1.1867701086  |

*syn\_Gauche*-CH<sub>3</sub>CH<sub>2</sub>CHOO 2d vdW

|   |               |               |               |
|---|---------------|---------------|---------------|
| C | -0.5809551351 | -0.119426534  | 0.9517447127  |
| H | -1.5452850268 | 0.1072270478  | 1.3921278763  |
| O | 0.1321445678  | 0.904582472   | 0.8228254611  |
| O | 1.3996717873  | 0.7378204652  | 0.2429522444  |
| O | 0.5338328835  | 1.3568536621  | -2.2524690268 |
| H | 0.6430440773  | 2.2909676216  | -2.4456981769 |
| H | 0.9849114369  | 1.2047692092  | -1.3861832121 |
| O | -1.9121218666 | 0.3239871234  | -1.4236677237 |
| H | -1.121829801  | 0.7420411399  | -1.8262032267 |
| H | -2.3483064807 | -0.1457469196 | -2.1381843539 |
| C | -0.1474240196 | -1.4853779134 | 0.6102524362  |
| H | -1.0341100888 | -2.1046534027 | 0.4890806495  |
| H | 0.3949754878  | -1.4359671336 | -0.3323230115 |
| C | 0.780589425   | -2.0612210036 | 1.7058371115  |
| H | 1.0894288256  | -3.0644550691 | 1.417223622   |
| H | 1.6668620866  | -1.4412574304 | 1.8137159878  |
| H | 0.2719318406  | -2.1278143348 | 2.6671266302  |

*syn\_Gauche*-CH<sub>3</sub>CH<sub>2</sub>CHOO 2a' TS

|   |              |               |               |
|---|--------------|---------------|---------------|
| C | 1.4076607702 | -0.2718148762 | -0.438119072  |
| H | 0.6446173224 | -0.6147737297 | 0.2551101564  |
| O | 1.7475623939 | 0.9347530367  | -0.1288705258 |
| O | 2.8465363291 | 1.4546605852  | -0.9289285592 |

|   |               |               |               |
|---|---------------|---------------|---------------|
| O | 0.2489133377  | -0.142161553  | -1.9047405681 |
| H | -0.5881060119 | 0.1682435035  | -1.5404481562 |
| H | 0.6795391915  | 0.7177707069  | -2.4198518054 |
| O | 1.3456612792  | 1.8564636782  | -2.8177203684 |
| H | 2.1094209649  | 1.7882650039  | -2.0185361349 |
| H | 1.7819437618  | 1.7957348024  | -3.6706993201 |
| C | 2.3715674059  | -1.328552867  | -0.9112427525 |
| H | 1.8642868691  | -2.2841328905 | -0.7733884373 |
| H | 3.1840556834  | -1.2847498211 | -0.1791536003 |
| C | 2.9568971467  | -1.2632970386 | -2.3232500683 |
| H | 3.5401555314  | -0.3590811393 | -2.4597671511 |
| H | 3.6063026534  | -2.1259301817 | -2.4736673056 |
| H | 2.1719273715  | -1.3045142199 | -3.0754433312 |

*syn\_Gauche*-CH<sub>3</sub>CH<sub>2</sub>CHOO 2a' vdW

|   |               |               |               |
|---|---------------|---------------|---------------|
| C | -0.0329891935 | -0.646457152  | 1.2782446477  |
| H | -0.94046894   | -0.9863567298 | 1.7641969461  |
| O | 0.0262007501  | 0.6051819687  | 1.2173421399  |
| O | 1.1246484693  | 1.1703770464  | 0.5676963173  |
| O | -2.0655531149 | -0.3647486601 | -1.013035252  |
| H | -3.0004088579 | -0.161889762  | -1.0912604953 |
| H | -1.5999220252 | 0.4561831074  | -1.2686215355 |
| O | -0.5298558708 | 1.9491636289  | -1.4750207154 |
| H | 0.1564555562  | 1.8256928997  | -0.7791876896 |
| H | -0.0579308759 | 2.1372429453  | -2.2892450866 |
| C | 1.0093745045  | -1.5566419993 | 0.7717036727  |
| H | 0.8990914301  | -2.5118806794 | 1.2844815672  |
| H | 1.9737464113  | -1.1109492341 | 1.0231446113  |
| C | 0.9381850686  | -1.7675257726 | -0.7600832542 |
| H | 1.1222839868  | -0.8304531734 | -1.2766575851 |
| H | 1.7042812665  | -2.4858012328 | -1.0474084413 |
| H | -0.0361185653 | -2.1427892009 | -1.0622438473 |

*syn\_Gauche*-CH<sub>3</sub>CH<sub>2</sub>CHOO 2b' TS

|   |              |               |               |
|---|--------------|---------------|---------------|
| C | 2.0716932156 | -1.4089280947 | -0.8005806257 |
| H | 1.1028670193 | -1.4114839157 | -0.3124546468 |
| O | 2.6798348822 | -0.3055564772 | -0.5251964984 |
| O | 4.0311259975 | -0.2318467569 | -1.0654657952 |
| O | 3.1742926548 | 0.310320145   | -3.2869026429 |
| H | 2.9816156176 | 1.2453794788  | -3.3914303389 |
| H | 3.6744029643 | 0.1637962506  | -2.3127516053 |
| O | 1.3381338603 | -1.1146531006 | -2.4938745485 |
| H | 2.0798688236 | -0.4455066456 | -2.9333308492 |
| H | 1.3307545894 | -1.9169067893 | -3.0273716058 |

|   |              |               |               |
|---|--------------|---------------|---------------|
| C | 2.7560418215 | -2.7499282517 | -0.8988281378 |
| H | 1.964740465  | -3.501284698  | -0.8566819181 |
| H | 3.3054446716 | -2.8236678813 | 0.0452646074  |
| C | 3.7094521426 | -3.0606918715 | -2.0554041896 |
| H | 4.5378808901 | -2.3620253469 | -2.0722540428 |
| H | 4.0942800087 | -4.073029496  | -1.9310813793 |
| H | 3.2112673761 | -3.023485549  | -3.0243767833 |

*syn\_Gauche*-CH<sub>3</sub>CH<sub>2</sub>CHOO 2b' vdW

|   |               |               |               |
|---|---------------|---------------|---------------|
| C | -0.5270013621 | -0.4551245467 | 1.2262899939  |
| H | -1.5875052989 | -0.5169266224 | 1.4426315988  |
| O | -0.1411233913 | 0.7322423456  | 1.105131942   |
| O | 1.1991187032  | 0.9435198095  | 0.7675400645  |
| O | 0.4877908054  | 1.6592546961  | -1.7640538508 |
| H | 0.4471553841  | 2.6118505467  | -1.8770387979 |
| H | 0.8690423563  | 1.5119663481  | -0.866178726  |
| O | -1.8556125212 | 0.1414032046  | -1.3803960903 |
| H | -1.1033957015 | 0.723270254   | -1.6100935328 |
| H | -2.2668018967 | -0.088640872  | -2.2165268473 |
| C | 0.3539732482  | -1.6307447992 | 1.109146667   |
| H | -0.115891202  | -2.4576825592 | 1.6412945037  |
| H | 1.2995826351  | -1.3702742708 | 1.5880531337  |
| C | 0.6319430132  | -2.0370821445 | -0.3582404854 |
| H | 1.1429487244  | -1.236395544  | -0.8841998681 |
| H | 1.2669887925  | -2.9214749952 | -0.3587902294 |
| H | -0.2923762887 | -2.2634528507 | -0.8836144755 |

*syn\_Gauche*-CH<sub>3</sub>CH<sub>2</sub>CHOO 2c' TS

|   |              |               |               |
|---|--------------|---------------|---------------|
| C | 1.4225800825 | -0.2741436942 | -0.487655229  |
| H | 0.653363416  | -0.5614661493 | 0.2217506022  |
| O | 1.8048408025 | 0.9301419859  | -0.225165375  |
| O | 2.8845308216 | 1.40093118    | -1.0831267961 |
| O | 0.2301113669 | -0.0896480222 | -1.8941611933 |
| H | 0.3134916329 | -0.8163852466 | -2.5206377593 |
| H | 0.5953241708 | 0.8156352194  | -2.3873453303 |
| O | 1.2115893752 | 1.9866018092  | -2.7651314053 |
| H | 2.060215302  | 1.8468916111  | -2.0711753787 |
| H | 1.5475366111 | 2.0232082029  | -3.6634981081 |
| C | 2.353527979  | -1.3850220395 | -0.9103721556 |
| H | 1.793291353  | -2.3154147649 | -0.7959834715 |
| H | 3.1183933308 | -1.3872637834 | -0.1272940896 |
| C | 3.0409941776 | -1.3541086588 | -2.2771878849 |
| H | 3.6510723035 | -0.4639340093 | -2.3794065044 |
| H | 3.6712263784 | -2.2381351843 | -2.3761392442 |

|   |              |              |               |
|---|--------------|--------------|---------------|
| H | 2.3260098961 | -1.379368456 | -3.1007906768 |
|---|--------------|--------------|---------------|

*syn\_Gauche*-CH<sub>3</sub>CH<sub>2</sub>CHOO 2c' vdW

|   |               |               |               |
|---|---------------|---------------|---------------|
| C | -0.0169821364 | -0.6544517066 | 1.2782427474  |
| H | -0.9167086564 | -1.0070891946 | 1.7695064103  |
| O | 0.027794786   | 0.598081375   | 1.2237624859  |
| O | 1.1146544359  | 1.1790146721  | 0.5685336096  |
| O | -2.0708294653 | -0.383052266  | -0.9952365116 |
| H | -3.0084784653 | -0.1902182073 | -1.0649182911 |
| H | -1.6164120394 | 0.4443957771  | -1.2499928029 |
| O | -0.5646910151 | 1.9503100396  | -1.4566725973 |
| H | 0.1284932231  | 1.8307456565  | -0.7669964422 |
| H | -0.1014130931 | 2.1480421962  | -2.2735716485 |
| C | 1.0313529931  | -1.5501859948 | 0.7584385511  |
| H | 0.9358152477  | -2.509354614  | 1.2668213922  |
| H | 1.9926897737  | -1.0951152682 | 1.0046491514  |
| C | 0.9502443567  | -1.753570441  | -0.7738693875 |
| H | 1.1197617937  | -0.8117220309 | -1.2867361683 |
| H | 1.7219578522  | -2.4616812475 | -1.071218177  |
| H | -0.022213591  | -2.1380537454 | -1.0703313215 |

*syn\_Gauche*-CH<sub>3</sub>CH<sub>2</sub>CHOO 2d' TS

|   |              |               |               |
|---|--------------|---------------|---------------|
| C | 2.0271593813 | -1.4053867739 | -0.7781674482 |
| H | 1.0499967269 | -1.4654044873 | -0.3073591113 |
| O | 2.5826283181 | -0.2836156301 | -0.4586439258 |
| O | 3.9514866245 | -0.1558632359 | -0.9364165445 |
| O | 3.2701721756 | 0.1523392221  | -3.256997553  |
| H | 3.1375682437 | 1.0732093616  | -3.4939961681 |
| H | 3.6797427044 | 0.1060597433  | -2.2225744213 |
| O | 1.3457047078 | -1.1851695913 | -2.5144444338 |
| H | 2.1255110112 | -0.5578526909 | -2.94842811   |
| H | 0.5733228307 | -0.6195772136 | -2.4037598765 |
| C | 2.7696697178 | -2.7094530542 | -0.9060464908 |
| H | 2.0158017788 | -3.4941161063 | -0.8307439967 |
| H | 3.3755038814 | -2.7515063156 | 0.0046006011  |
| C | 3.6606506884 | -2.9756796159 | -2.1218089163 |
| H | 4.4709910604 | -2.257740441  | -2.181132194  |
| H | 4.0839637386 | -3.9760144192 | -2.0294958509 |
| H | 3.0881884105 | -2.9393737519 | -3.0456435597 |

*syn\_Gauche*-CH<sub>3</sub>CH<sub>2</sub>CHOO 2d' vdW

|   |               |               |              |
|---|---------------|---------------|--------------|
| C | -0.5471185278 | -0.4474035136 | 1.2151630152 |
| H | -1.6113796698 | -0.5012602041 | 1.4145098911 |
| O | -0.1512722715 | 0.7368812653  | 1.0960109216 |

|   |               |               |               |
|---|---------------|---------------|---------------|
| O | 1.1956611259  | 0.9378769899  | 0.7794277248  |
| O | 0.530263041   | 1.6490356987  | -1.7659131243 |
| H | 0.4979350401  | 2.6014602923  | -1.8829517329 |
| H | 0.8959306299  | 1.5024972842  | -0.8614581394 |
| O | -1.8292951747 | 0.148411774   | -1.4148355569 |
| H | -1.0695320953 | 0.7243580391  | -1.634392814  |
| H | -2.2284395731 | -0.081959509  | -2.2566933462 |
| C | 0.3276291336  | -1.6293552999 | 1.1165346395  |
| H | -0.1563920437 | -2.4511353686 | 1.6439631504  |
| H | 1.2671124966  | -1.3734886154 | 1.609765461   |
| C | 0.6265415791  | -2.0429818938 | -0.3446860077 |
| H | 1.1514171096  | -1.2477054629 | -0.8651665928 |
| H | 1.2554923701  | -2.9316258555 | -0.3317680059 |
| H | -0.2906711699 | -2.2650676206 | -0.8841544836 |

*anti*\_Anti-CH<sub>2</sub>CHCHO

|   |               |               |               |
|---|---------------|---------------|---------------|
| C | -0.1507529385 | 0.2141898063  | -0.0816585002 |
| O | 1.112237684   | 0.1107412427  | -0.0258760898 |
| C | -0.9533103002 | -0.8956854614 | 0.3199684923  |
| H | -0.4282474189 | -1.7803652791 | 0.6560651155  |
| O | 1.8591351457  | 1.1798400133  | -0.4130435737 |
| H | -0.5532344467 | 1.1567954662  | -0.4376071654 |
| C | -2.2930551519 | -0.8496598996 | 0.2845258895  |
| H | -2.8918388895 | -1.6943548705 | 0.5903704333  |
| H | -2.8199776841 | 0.0335429821  | -0.0510326017 |

*anti*\_Anti-CH<sub>2</sub>CHCHO carbonyl insertion 1a TS

|   |               |               |               |
|---|---------------|---------------|---------------|
| C | 1.6878856649  | -0.1267684901 | -0.0227343931 |
| H | 2.6186663862  | -0.5437533078 | 0.3424495594  |
| O | 1.3923542416  | 1.0808346884  | 0.3295553724  |
| O | 2.6206216634  | 1.8477110181  | 0.2696021285  |
| C | 0.5806291768  | -0.9993862408 | -0.3665030649 |
| H | -0.3497259657 | -0.5169235373 | -0.6328931593 |
| C | 0.7134269892  | -2.3247365381 | -0.3560071091 |
| H | 1.6515712233  | -2.7976325466 | -0.0956915292 |
| H | -0.1098885762 | -2.9762724046 | -0.6104544665 |
| O | 2.6198802864  | 0.4760215491  | -1.679095435  |
| H | 3.4233539253  | -0.0372834961 | -1.8111905685 |
| H | 2.8462609849  | 1.2891343058  | -0.9071483348 |

*anti*\_Anti-CH<sub>2</sub>CHCHO carbonyl insertion 1a vdW

|   |               |               |               |
|---|---------------|---------------|---------------|
| C | -0.3305670441 | -0.2708870124 | 0.2194342757  |
| H | 0.4006773923  | -0.4259748804 | -0.5694204287 |



|   |               |               |               |
|---|---------------|---------------|---------------|
| O | -0.3652218463 | 0.8574642767  | 0.7955407428  |
| O | 0.5315207599  | 1.8269026025  | 0.4106508252  |
| C | -1.2658857097 | -1.2689236321 | 0.6348648592  |
| H | -1.9551053625 | -1.0038182957 | 1.4258372116  |
| C | -1.2808806679 | -2.4811180461 | 0.0633022158  |
| H | -0.5887480283 | -2.7396456256 | -0.7268401328 |
| H | -1.9844223941 | -3.2396018821 | 0.3729615809  |
| O | 1.881319015   | 0.6793811596  | -1.725866226  |
| H | 2.1382002392  | 1.238477833   | -2.4621748469 |
| H | 1.5261286465  | 1.2728765027  | -1.0323010767 |

*anti*\_Anti-CH<sub>2</sub>CHCHO carbonyl insertion 1b TS

|   |               |               |               |
|---|---------------|---------------|---------------|
| C | 1.6668511481  | -0.10295989   | -0.0332203174 |
| H | 2.6181124034  | -0.5057538872 | 0.289108131   |
| O | 1.3680506003  | 1.1081746837  | 0.3141658276  |
| O | 2.5818090201  | 1.8888512337  | 0.198867791   |
| C | 0.5541215261  | -0.99057769   | -0.3157134448 |
| H | -0.4138273476 | -0.5270736569 | -0.4538766059 |
| C | 0.7248587615  | -2.3091830164 | -0.4054382413 |
| H | 1.6996214     | -2.7611665573 | -0.2782801134 |
| H | -0.1018054662 | -2.9714181698 | -0.6183772808 |
| O | 2.6847237917  | 0.4065897971  | -1.6698574777 |
| H | 2.0581329322  | 0.7025260384  | -2.3398162593 |
| H | 2.8360432304  | 1.2769011148  | -0.9408230091 |

*anti*\_Anti-CH<sub>2</sub>CHCHO carbonyl insertion 1b vdW

|   |               |               |               |
|---|---------------|---------------|---------------|
| C | -0.3272829838 | -0.2714521666 | 0.2259355497  |
| H | 0.3971877042  | -0.4268279513 | -0.5690882985 |
| O | -0.369415672  | 0.8629849784  | 0.7894542994  |
| O | 0.5112260457  | 1.8386428537  | 0.3836716098  |
| C | -1.2458159342 | -1.2758164984 | 0.6630054749  |
| H | -1.9295838121 | -1.0099080417 | 1.4584273807  |
| C | -1.2522563011 | -2.4946305379 | 0.105533635   |
| H | -0.5656469663 | -2.7539175305 | -0.689165627  |
| H | -1.9431080335 | -3.257905636  | 0.4315591213  |
| O | 1.8516224661  | 0.6828447688  | -1.7543068101 |
| H | 2.0936659197  | 1.2364458359  | -2.4997384323 |
| H | 1.4967825672  | 1.2799959256  | -1.0637069028 |

*anti*\_Anti-CH<sub>2</sub>CHCHO carbonyl insertion 2a TS

|   |              |               |               |
|---|--------------|---------------|---------------|
| C | 1.8655290955 | -0.2847360489 | -0.3915051196 |
| H | 2.7678061594 | -0.6799920932 | 0.0559344588  |
| O | 1.5448188049 | 0.9276263886  | -0.080433023  |
| O | 2.6904359412 | 1.6830640001  | 0.3923068775  |

|   |               |               |               |
|---|---------------|---------------|---------------|
| C | 0.721159099   | -1.1687197737 | -0.6390915344 |
| H | -0.2189934855 | -0.676108567  | -0.8516904636 |
| C | 0.8204267745  | -2.4923824618 | -0.5674888814 |
| H | 1.761340097   | -2.9793031115 | -0.3478675648 |
| H | -0.0379644741 | -3.128813687  | -0.7270018058 |
| O | 3.6312039389  | 2.0192629487  | -1.8202705701 |
| H | 4.5885796096  | 2.0930071904  | -1.8030655221 |
| H | 3.2457201737  | 1.9830007607  | -0.7544141669 |
| O | 2.7301997311  | -0.2259394799 | -2.074613208  |
| H | 2.0415117278  | -0.2166257442 | -2.7490539121 |
| H | 3.2061668069  | 0.7820896787  | -2.0650045645 |

*anti*\_Anti-CH<sub>2</sub>CHCHO carbonyl insertion 2a vdW

|   |               |               |               |
|---|---------------|---------------|---------------|
| C | -0.7016421808 | -0.2214543742 | 0.4654798015  |
| H | -0.3857270017 | -0.0297678662 | -0.5561878747 |
| O | -0.6066631306 | 0.70215351    | 1.3241720732  |
| O | -0.099372003  | 1.9233295952  | 0.9028373979  |
| C | -1.203773982  | -1.4959220404 | 0.8735077396  |
| H | -1.5344830026 | -1.6063875279 | 1.8977139943  |
| C | -1.2366294035 | -2.5088945008 | -0.0045357815 |
| H | -0.8774689628 | -2.3763435981 | -1.0166173978 |
| H | -1.6043636472 | -3.4844454122 | 0.2782165842  |
| O | 1.9853983348  | 1.4553506798  | -0.7583275388 |
| H | 2.800964498   | 1.4784590106  | -0.2530973102 |
| H | 1.2588881788  | 1.7017047693  | -0.1327511035 |
| O | 0.8736789292  | -0.5630745061 | -2.2760226449 |
| H | 0.8299015649  | -0.3087389577 | -3.2007232275 |
| H | 1.4166538085  | 0.1250092186  | -1.8398027118 |

*anti*\_Anti-CH<sub>2</sub>CHCHO carbonyl insertion 2b TS

|   |               |               |               |
|---|---------------|---------------|---------------|
| C | 1.7979126422  | -0.2297897679 | -0.285068279  |
| H | 2.6718387271  | -0.5670797534 | 0.2593820462  |
| O | 1.4685882065  | 1.0058540074  | -0.1228797515 |
| O | 2.5899325507  | 1.7967715338  | 0.3609679676  |
| C | 0.6865255179  | -1.1526516972 | -0.5246089267 |
| H | -0.1779601754 | -0.7388029143 | -1.0252716061 |
| C | 0.7310024333  | -2.417023499  | -0.1176597611 |
| H | 1.5972640592  | -2.8206354128 | 0.3907237083  |
| H | -0.1016856792 | -3.0874243145 | -0.2734818845 |
| O | 3.7426036618  | 1.9066893727  | -1.7685321072 |
| H | 3.4107633047  | 2.6010729428  | -2.3430363347 |
| H | 3.2338686633  | 1.98593683    | -0.7610645131 |
| O | 2.6417545439  | -0.2496053424 | -1.9905853304 |
| H | 3.2905793702  | -0.9604469231 | -2.0392572815 |

|   |              |              |               |
|---|--------------|--------------|---------------|
| H | 3.1832221739 | 0.7244619379 | -2.0056789463 |
|---|--------------|--------------|---------------|

*anti*\_Anti-CH<sub>2</sub>CHCHO carbonyl insertion 2b vdW

|   |               |               |               |
|---|---------------|---------------|---------------|
| C | -0.4872474548 | -0.2980306184 | 0.6580231306  |
| H | 0.431938154   | -0.4928883855 | 0.1126059363  |
| O | -0.6269631996 | 0.8072556798  | 1.2565605917  |
| O | 0.4185508922  | 1.7168587724  | 1.181340108   |
| C | -1.554170619  | -1.2480803905 | 0.7024314844  |
| H | -2.4262293387 | -1.0039250807 | 1.2944377999  |
| C | -1.4549948879 | -2.3910453449 | 0.0082061251  |
| H | -0.5806557515 | -2.5988037619 | -0.5944900751 |
| H | -2.24870323   | -3.1237193106 | 0.0178352483  |
| O | 1.3805126328  | 1.7058637136  | -1.3483309658 |
| H | 0.9551374561  | 2.4052368768  | -1.8492031316 |
| H | 1.0576624972  | 1.789801826   | -0.4163565823 |
| O | 1.4369085208  | -1.0205453725 | -1.7688642892 |
| H | 2.3311755849  | -1.3181562492 | -1.9515891516 |
| H | 1.4756957434  | -0.0425243544 | -1.7920982288 |

*anti*\_Anti-CH<sub>2</sub>CHCHO carbonyl insertion 2c TS

|   |               |               |               |
|---|---------------|---------------|---------------|
| C | 1.8293136317  | -0.2503576123 | -0.2833006459 |
| H | 2.6901335963  | -0.6107269432 | 0.2673906095  |
| O | 1.5277212667  | 0.992313407   | -0.1186004793 |
| O | 2.6719043071  | 1.7584471982  | 0.3473824186  |
| C | 0.694859386   | -1.1441972295 | -0.5274984986 |
| H | -0.1532136553 | -0.7084288315 | -1.037512108  |
| C | 0.7014797778  | -2.4076934109 | -0.1157186874 |
| H | 1.5519709749  | -2.8329834824 | 0.4016336494  |
| H | -0.147752724  | -3.0558139933 | -0.2764116979 |
| O | 3.62775045    | 1.9467119968  | -1.8737388596 |
| H | 4.5820010347  | 2.0512502827  | -1.8606849776 |
| H | 3.2378107111  | 1.987271779   | -0.8075562228 |
| O | 2.680495155   | -0.2901644457 | -1.97663136   |
| H | 3.3292584699  | -1.0015271353 | -2.0068951237 |
| H | 3.2082046181  | 0.6935924205  | -2.0253910167 |

*anti*\_Anti-CH<sub>2</sub>CHCHO carbonyl insertion 2c vdW

|   |               |               |               |
|---|---------------|---------------|---------------|
| C | -0.7519567869 | -0.1421009019 | 0.4188522091  |
| H | -0.3695719569 | -0.1011848808 | -0.5972478523 |
| O | -0.7113692805 | 0.8990205092  | 1.1356810355  |
| O | -0.1751067088 | 2.0483080484  | 0.5720323886  |
| C | -1.2823126233 | -1.346020508  | 0.9775935384  |
| H | -1.6794559967 | -1.3063508503 | 1.9832141855  |
| C | -1.2598334475 | -2.4779073987 | 0.2589282502  |

|   |               |               |               |
|---|---------------|---------------|---------------|
| H | -0.8350476663 | -2.4937249924 | -0.7361506976 |
| H | -1.6472750136 | -3.4037035232 | 0.6585124336  |
| O | 2.0127570759  | 1.3558010426  | -0.8626798343 |
| H | 2.793619571   | 1.4596115736  | -0.3145770887 |
| H | 1.2474341208  | 1.6863822753  | -0.3289653891 |
| O | 0.9983749876  | -0.8732452232 | -2.1337843451 |
| H | 1.015615481   | -0.7587560689 | -3.0868159047 |
| H | 1.5131222442  | -0.1241111016 | -1.769912929  |

*anti*\_Anti-CH<sub>2</sub>CHCHO carbonyl insertion 2d TS

|   |               |               |               |
|---|---------------|---------------|---------------|
| C | 1.7663272857  | -0.1818583557 | -0.2837093665 |
| H | 2.6419665633  | -0.4858124677 | 0.2745913082  |
| O | 1.4038704277  | 1.0535720155  | -0.1674919042 |
| O | 2.4951807357  | 1.8942429282  | 0.29388659    |
| C | 0.6573133278  | -1.1227640662 | -0.4783001623 |
| H | -0.2779080072 | -0.6894643306 | -0.8091985577 |
| C | 0.7780508577  | -2.4218515441 | -0.2238287575 |
| H | 1.7131769135  | -2.848755243  | 0.1135966379  |
| H | -0.0562688933 | -3.0973536719 | -0.3461115878 |
| O | 3.7791782944  | 1.8544304329  | -1.7621492303 |
| H | 3.5155382882  | 2.5353950147  | -2.3854512107 |
| H | 3.2055746373  | 1.9961418044  | -0.7959162012 |
| O | 2.7380267841  | -0.3397591002 | -1.8976622116 |
| H | 2.0900526735  | -0.4137466131 | -2.6069409244 |
| H | 3.2342631117  | 0.6540551967  | -1.974848422  |

*anti*\_Anti-CH<sub>2</sub>CHCHO carbonyl insertion 2d vdW

|   |               |               |               |
|---|---------------|---------------|---------------|
| C | -0.5073042065 | -0.2829961182 | 0.6489977119  |
| H | 0.4306621803  | -0.4875054599 | 0.1403257625  |
| O | -0.6722085663 | 0.8373080055  | 1.2121591331  |
| O | 0.3710819829  | 1.750262957   | 1.1474023988  |
| C | -1.5707663184 | -1.2373336336 | 0.6833539729  |
| H | -2.4634324428 | -0.9820255827 | 1.2388130326  |
| C | -1.4429739121 | -2.398115876  | 0.0242581133  |
| H | -0.5478336865 | -2.6173183145 | -0.542795307  |
| H | -2.2331983146 | -3.1346034634 | 0.0271371682  |
| O | 1.418013001   | 1.6760515893  | -1.347222868  |
| H | 1.0066128008  | 2.3592610495  | -1.8809967024 |
| H | 1.0634740643  | 1.7834203498  | -0.4292750374 |
| O | 1.5010384308  | -1.060394275  | -1.6911705033 |
| H | 2.4023190937  | -1.3579378604 | -1.8355144478 |
| H | 1.5361228933  | -0.0831633675 | -1.7397324273 |

*anti*\_Anti-CH<sub>2</sub>CHCHO vinyl insertion 1a TS

|   |               |               |               |
|---|---------------|---------------|---------------|
| C | -0.1614616388 | -0.0711587987 | -0.1191555148 |
| O | 1.138568079   | 0.085478394   | -0.2403628314 |
| C | -0.7022700746 | -1.0040646696 | 0.7412136607  |
| H | -0.0670012852 | -1.7485660566 | 1.1964676708  |
| O | 1.3448178595  | 1.5112970593  | -0.0528411979 |
| H | -0.7632672674 | 0.7260274846  | -0.5354995441 |
| C | -1.7265327721 | -0.4067349648 | 1.4445945849  |
| H | -2.0065188899 | -0.7707345807 | 2.4216333381  |
| H | -2.3678442414 | 0.3345154217  | 1.0001565793  |
| O | -0.4071282644 | 1.3430294523  | 1.8754282953  |
| H | 0.7659799804  | 1.6273627081  | 0.8070036017  |
| H | -0.4779180152 | 2.0579732504  | 2.5199214772  |

*anti\_Anti-CH<sub>2</sub>CHCHO vinyl insertion 1a vdW*

|   |               |               |               |
|---|---------------|---------------|---------------|
| C | -0.1844114037 | -0.4138235085 | -0.1379958967 |
| O | 0.8844062411  | -0.2531710694 | -0.7998854491 |
| C | -0.8986217495 | -1.641672534  | -0.2985261397 |
| H | -0.4846609548 | -2.3700467666 | -0.983397016  |
| O | 1.5806872153  | 0.9248789814  | -0.6602773858 |
| H | -0.5045669659 | 0.3832759619  | 0.5277359647  |
| C | -2.0342130008 | -1.8725466217 | 0.3748582512  |
| H | -2.5787483011 | -2.7976857424 | 0.2575735925  |
| H | -2.4427158467 | -1.1398283059 | 1.0578336917  |
| O | 0.190572121   | 2.2938603698  | 1.3138344162  |
| H | 0.8308000711  | 1.9868878812  | 0.6390737596  |
| H | 0.6854765739  | 2.8229753542  | 1.9429882114  |

*anti\_Anti-CH<sub>2</sub>CHCHO vinyl insertion 2a TS*

|   |               |               |               |
|---|---------------|---------------|---------------|
| C | -0.1534827795 | 0.0752187523  | -0.0653278243 |
| O | 1.1441389696  | 0.0803384408  | -0.0501809845 |
| C | -0.9002639313 | -0.9290983896 | 0.5139095523  |
| H | -0.4081113061 | -1.7828630345 | 0.9561212148  |
| O | 1.5991811703  | 1.4507111007  | -0.0959478687 |
| H | -0.6202240431 | 0.9727340228  | -0.4500173042 |
| C | -2.1772304093 | -0.5502257911 | 0.891994027   |
| H | -2.8059832107 | -1.2126327977 | 1.4659656355  |
| H | -2.6914597745 | 0.2411143936  | 0.3710375373  |
| O | 0.1005008263  | 2.0066775323  | 1.7749469081  |
| H | 1.0123796421  | 1.8117312541  | 0.7755692767  |
| H | 0.0482563946  | 2.9460301266  | 1.965596554   |
| O | -1.9548278546 | 0.8033276537  | 2.4330071021  |
| H | -1.0460224388 | 1.3593531598  | 2.1670838613  |
| H | -1.743069275  | 0.3156102863  | 3.2360656526  |

*anti*\_Anti-CH<sub>2</sub>CHCHO vinyl insertion 2a vdW

|   |               |               |               |
|---|---------------|---------------|---------------|
| C | 0.1279212515  | -0.7280517507 | -0.4616369838 |
| O | 1.158054626   | -0.3363157968 | -1.0819569923 |
| C | -0.7806736574 | -1.6134686675 | -1.1199355053 |
| H | -0.5231933371 | -1.9581598963 | -2.1126395868 |
| O | 2.0128165297  | 0.5367448731  | -0.4236964206 |
| H | -0.0497952621 | -0.3711745545 | 0.5489992351  |
| C | -1.9170455656 | -1.9752883092 | -0.5068253982 |
| H | -2.6251143474 | -2.6374067914 | -0.9833902454 |
| H | -2.1602576265 | -1.5964509708 | 0.4771537154  |
| O | 0.5153433063  | 2.3521034151  | 0.9129156958  |
| H | 1.1251581879  | 1.7465911159  | 0.4216402133  |
| H | 0.4056374705  | 3.1327485939  | 0.365651067   |
| O | -1.3627082265 | 0.6419954895  | 1.9910168459  |
| H | -0.7941036464 | 1.3797721672  | 1.6894473596  |
| H | -1.3464517028 | 0.6797680823  | 2.9501740003  |

*anti*\_Anti-CH<sub>2</sub>CHCHO vinyl insertion 2b TS

|   |               |               |               |
|---|---------------|---------------|---------------|
| C | -0.1515110641 | 0.0593654199  | -0.0589638061 |
| O | 1.1457673541  | 0.0656226775  | -0.0602215953 |
| C | -0.9099948098 | -0.9322093816 | 0.5224813477  |
| H | -0.4340995553 | -1.7771147051 | 0.9968234506  |
| O | 1.5875968537  | 1.4417273497  | -0.0937849983 |
| H | -0.6164072454 | 0.9584511252  | -0.4466378903 |
| C | -2.1968002734 | -0.5412518972 | 0.8582683943  |
| H | -2.8295833378 | -1.1843515046 | 1.4481294186  |
| H | -2.6978153891 | 0.2196004571  | 0.2808305181  |
| O | 0.1161761076  | 2.0484746871  | 1.7710745041  |
| H | 0.9848389457  | 1.80999048    | 0.7823322479  |
| H | 0.6364760713  | 2.2294225999  | 2.5580333774  |
| O | -1.9021669837 | 0.7768751324  | 2.4001133882  |
| H | -0.9988817124 | 1.3610825708  | 2.1342167743  |
| H | -2.6294092015 | 1.4014837692  | 2.4998470386  |

*anti*\_Anti-CH<sub>2</sub>CHCHO vinyl insertion 2b vdW

|   |               |               |               |
|---|---------------|---------------|---------------|
| C | -0.0246466842 | -0.558070622  | -0.6662911151 |
| O | 1.1517702241  | -0.3491762045 | -1.0808307301 |
| C | -0.5818344187 | -1.8676467411 | -0.7983333524 |
| H | 0.0102298553  | -2.6225098647 | -1.2985460212 |
| O | 1.6726735863  | 0.9275588435  | -0.9236733515 |
| H | -0.5772058557 | 0.2567388102  | -0.2067921125 |
| C | -1.796864487  | -2.1265097542 | -0.293503198  |
| H | -2.2394305973 | -3.1087228586 | -0.3726897525 |
| H | -2.3573207515 | -1.3581496211 | 0.2226236566  |

|   |               |              |              |
|---|---------------|--------------|--------------|
| O | 0.9583383406  | 1.8476692035 | 1.5192533477 |
| H | 1.2866855744  | 1.5635038213 | 0.6297108741 |
| H | 1.6635357133  | 1.662224141  | 2.1431492028 |
| O | -1.6846910223 | 1.055331631  | 1.5145745098 |
| H | -0.7828975972 | 1.3963911542 | 1.6849103573 |
| H | -2.2673038801 | 1.8134880614 | 1.6008026851 |

*anti\_Syn*-CH<sub>2</sub>CHCHO

|   |               |               |               |
|---|---------------|---------------|---------------|
| C | -0.4660812677 | 0.4698466208  | -0.1512969925 |
| O | 0.7915583659  | 0.3169924151  | -0.1396846746 |
| C | -1.3382935563 | -0.5963533471 | 0.2614094319  |
| O | 1.5718443265  | 1.3588057509  | -0.5404018503 |
| H | -0.8318630836 | 1.4345782311  | -0.4849968379 |
| C | -0.9431393468 | -1.8062524531 | 0.6822217295  |
| H | -1.6678235895 | -2.551379428  | 0.974605436   |
| H | 0.1019179174  | -2.0747112823 | 0.7427513082  |
| H | -2.3926267658 | -0.3578255075 | 0.2119604497  |

*anti\_Syn*-CH<sub>2</sub>CHCHO carbonyl insertion 1a TS

|   |               |               |               |
|---|---------------|---------------|---------------|
| C | 1.7158388553  | -0.1479150043 | 0.0740802682  |
| H | 2.6858712104  | -0.5721469961 | 0.2986488756  |
| O | 1.4833000254  | 1.0469806141  | 0.5085736645  |
| O | 2.6961187644  | 1.8149063495  | 0.3039363757  |
| C | 0.5772268598  | -1.018543344  | -0.1772807303 |
| H | 0.7913680616  | -2.0778353814 | -0.2201848946 |
| C | -0.66032529   | -0.5560370535 | -0.3534387592 |
| H | -0.8702175336 | 0.503949913   | -0.3398295321 |
| H | -1.4881664849 | -1.2302552705 | -0.5192586672 |
| O | 2.4553178668  | 0.5044558934  | -1.6747008996 |
| H | 3.2420269165  | 0.0048647915  | -1.9163312587 |
| H | 2.7702167484  | 1.2892234883  | -0.9106414423 |

*anti\_Syn*-CH<sub>2</sub>CHCHO carbonyl insertion 1a vdW

|   |               |               |               |
|---|---------------|---------------|---------------|
| C | -0.2601041537 | -0.4309759035 | -0.080469974  |
| H | 0.5883803232  | -0.6497295608 | -0.7220550708 |
| O | -0.2974191983 | 0.7017764089  | 0.4831831729  |
| O | 0.7356356088  | 1.5874714926  | 0.2765351251  |
| C | -1.3311452746 | -1.3710816074 | 0.1323950641  |
| H | -1.2180339312 | -2.3070267748 | -0.3981458484 |
| C | -2.4000191342 | -1.1607379985 | 0.9120208638  |
| H | -2.5358817915 | -0.2355950676 | 1.4540460506  |
| H | -3.16112293   | -1.9191120645 | 1.0205608782  |
| O | 2.3219904259  | 0.3339537912  | -1.6283958942 |
| H | 2.7330272809  | 0.8696703839  | -2.3101465782 |

|   |              |              |               |
|---|--------------|--------------|---------------|
| H | 1.9072187747 | 0.9543379004 | -0.9948467891 |
|---|--------------|--------------|---------------|

*anti\_Syn*-CH<sub>2</sub>CHCHO carbonyl insertion 1b TS

|   |               |               |               |
|---|---------------|---------------|---------------|
| C | 1.6756238118  | -0.0782795911 | -0.0603509813 |
| H | 2.6245378691  | -0.5148767946 | 0.2209877703  |
| O | 1.4232685943  | 1.1179194509  | 0.3587242704  |
| O | 2.6601353993  | 1.8690929677  | 0.2459337599  |
| C | 0.5521188814  | -0.943736908  | -0.4014052818 |
| H | 0.7997474777  | -1.9831179991 | -0.5676616295 |
| C | -0.7050273094 | -0.5099526406 | -0.4944890482 |
| H | -0.9561990299 | 0.5295679867  | -0.3366027695 |
| H | -1.5122299675 | -1.1911004009 | -0.7220997177 |
| O | 2.670979007   | 0.4703824852  | -1.7034270995 |
| H | 2.0259286443  | 0.8102425307  | -2.3339277528 |
| H | 2.8676096219  | 1.287759913   | -0.9589145202 |

*anti\_Syn*-CH<sub>2</sub>CHCHO carbonyl insertion 1b vdW

|   |               |               |               |
|---|---------------|---------------|---------------|
| C | -0.2564826035 | -0.4308992893 | -0.0905798236 |
| H | 0.623682164   | -0.6603155069 | -0.6839503668 |
| O | -0.3132499958 | 0.7041561507  | 0.4667814188  |
| O | 0.7384662022  | 1.5788397768  | 0.3145203022  |
| C | -1.3470153424 | -1.359592465  | 0.0659664098  |
| H | -1.214403608  | -2.2984842001 | -0.4547615131 |
| C | -2.4548854261 | -1.1359148882 | 0.7850938616  |
| H | -2.6109518518 | -0.2075588179 | 1.3160719565  |
| H | -3.2284065847 | -1.8863250364 | 0.8539474028  |
| O | 2.414223192   | 0.3029519311  | -1.4967033495 |
| H | 2.8674148904  | 0.8321596565  | -2.1564639227 |
| H | 1.9715929636  | 0.9296476887  | -0.888733376  |

*anti\_Syn*-CH<sub>2</sub>CHCHO carbonyl insertion 2a TS

|   |               |               |               |
|---|---------------|---------------|---------------|
| C | 1.7649747088  | -0.1428065955 | -0.3817022017 |
| H | 2.6472143043  | -0.4695871794 | 0.154758239   |
| O | 1.4381026621  | 1.093732969   | -0.236118939  |
| O | 2.5460813147  | 1.893036106   | 0.2682191882  |
| C | 0.6710881518  | -1.1016058727 | -0.6129052136 |
| H | 0.9909491136  | -2.108234998  | -0.8447554361 |
| C | -0.6163319141 | -0.7853810613 | -0.5129467504 |
| H | -0.933996735  | 0.2168658153  | -0.2630631518 |
| H | -1.3825775052 | -1.5313252987 | -0.6676223143 |
| O | 3.8061259078  | 1.8489536106  | -1.8163354583 |
| H | 4.7546516794  | 1.8485432136  | -1.666582653  |
| H | 3.2840675339  | 1.9854776462  | -0.8340161521 |
| O | 2.7044520329  | -0.3186556484 | -2.0181646227 |



|   |              |               |               |
|---|--------------|---------------|---------------|
| H | 2.0415114977 | -0.2327234588 | -2.7137925999 |
| H | 3.2826012474 | 0.6205407522  | -2.0167839344 |

*anti\_Syn*-CH<sub>2</sub>CHCHO carbonyl insertion 2a vdW

|   |               |               |               |
|---|---------------|---------------|---------------|
| C | -0.285180014  | -0.6049652466 | 0.6700404005  |
| H | 0.7309456052  | -0.9561996393 | 0.7908502345  |
| O | -0.5007825403 | 0.6226646094  | 0.8530938141  |
| O | 0.5932966709  | 1.4086563297  | 1.2194079842  |
| C | -1.3704980917 | -1.4934854123 | 0.3333880579  |
| H | -1.0635861883 | -2.4946319685 | 0.0656356345  |
| C | -2.6631263433 | -1.1503125106 | 0.3516198863  |
| H | -2.9832144237 | -0.1552464428 | 0.6267707541  |
| H | -3.4286332583 | -1.8670102981 | 0.0929045397  |
| O | 1.9489023233  | 1.583480253   | -1.1250629535 |
| H | 2.8662371157  | 1.8064550797  | -0.9496863682 |
| H | 1.4850941871  | 1.6406550513  | -0.2537510823 |
| O | 1.2217990887  | -1.0186118281 | -1.6711211408 |
| H | 0.9237802783  | -1.1022087019 | -2.579923737  |
| H | 1.5665625904  | -0.1033652749 | -1.590330024  |

*anti\_Syn*-CH<sub>2</sub>CHCHO carbonyl insertion 2b TS

|   |               |               |               |
|---|---------------|---------------|---------------|
| C | 1.7563909956  | -0.181614582  | -0.3337962076 |
| H | 2.5963513812  | -0.5286149487 | 0.256315525   |
| O | 1.4651214607  | 1.0644383436  | -0.2103126805 |
| O | 2.5816082691  | 1.8234941857  | 0.3382660846  |
| C | 0.6487529516  | -1.0991975148 | -0.6363101665 |
| H | 0.9440870034  | -2.1039825604 | -0.9049261558 |
| C | -0.6315720962 | -0.7538197865 | -0.5534110854 |
| H | -0.9298737883 | 0.2457140766  | -0.2718181913 |
| H | -1.4121777901 | -1.4718288062 | -0.7591670127 |
| O | 3.7749204448  | 1.8873747497  | -1.7702688412 |
| H | 3.4517089775  | 2.5671929635  | -2.3666471149 |
| H | 3.2575385363  | 1.9942037094  | -0.7715318511 |
| O | 2.7332324574  | -0.3034649242 | -1.9770577923 |
| H | 3.4320015987  | -0.9639068293 | -1.9049949814 |
| H | 3.2354955983  | 0.6920969237  | -1.9960195289 |

*anti\_Syn*-CH<sub>2</sub>CHCHO carbonyl insertion 2b vdW

|   |               |               |               |
|---|---------------|---------------|---------------|
| C | -0.4777149566 | -0.5130737141 | 0.3715064246  |
| H | 0.5151403676  | -0.759946513  | 0.0041117198  |
| O | -0.6477982432 | 0.5831762582  | 0.9764147319  |
| O | 0.451490396   | 1.4033706425  | 1.1714425738  |
| C | -1.5966529662 | -1.3975332982 | 0.1602581612  |
| H | -1.3610358607 | -2.2824213791 | -0.4150605974 |

|   |               |               |               |
|---|---------------|---------------|---------------|
| C | -2.8376051311 | -1.1896648828 | 0.6186218865  |
| H | -3.090910412  | -0.3131818777 | 1.1983203049  |
| H | -3.6255100976 | -1.9013431197 | 0.4206215185  |
| O | 1.9755135372  | 1.5627018071  | -1.0724904851 |
| H | 1.6796999894  | 2.3144940652  | -1.5906071531 |
| H | 1.4424638434  | 1.5699658237  | -0.2410574765 |
| O | 1.8193607103  | -1.1188284352 | -1.6861720355 |
| H | 2.6859570758  | -1.5252245166 | -1.7579552083 |
| H | 1.9811107476  | -0.1555998601 | -1.6232213651 |

*anti\_Syn*-CH<sub>2</sub>CHCHO carbonyl insertion 2c TS

|   |               |               |               |
|---|---------------|---------------|---------------|
| C | 1.7839348043  | -0.2142056493 | -0.3171367622 |
| H | 2.6165777622  | -0.5870321573 | 0.267579843   |
| O | 1.5238374931  | 1.037954777   | -0.1817871828 |
| O | 2.6710742972  | 1.7679206384  | 0.3375300838  |
| C | 0.6506446124  | -1.1006075559 | -0.6175902621 |
| H | 0.9173626882  | -2.1159856384 | -0.8761593528 |
| C | -0.619145159  | -0.715380484  | -0.5494136894 |
| H | -0.889095811  | 0.2958183666  | -0.2812604044 |
| H | -1.4194554327 | -1.4110525725 | -0.7561707002 |
| O | 3.635375174   | 1.9145197451  | -1.880049659  |
| H | 4.5871162444  | 2.0396576979  | -1.8876824892 |
| H | 3.2550700214  | 1.9796335076  | -0.8100440511 |
| O | 2.751311269   | -0.3530792739 | -1.960018576  |
| H | 3.4533585186  | -1.0067180457 | -1.8666654493 |
| H | 3.2375295179  | 0.6541296446  | -2.0165383484 |

*anti\_Syn*-CH<sub>2</sub>CHCHO carbonyl insertion 2c vdW

|   |               |               |               |
|---|---------------|---------------|---------------|
| C | -0.30254014   | -0.5761769298 | 0.6636049346  |
| H | 0.7149676656  | -0.9159146771 | 0.8040623432  |
| O | -0.530605282  | 0.6532293624  | 0.8172751284  |
| O | 0.5523703434  | 1.4564078992  | 1.1792792997  |
| C | -1.376251843  | -1.4811388826 | 0.3335956989  |
| H | -1.0577673218 | -2.4851740811 | 0.0913933047  |
| C | -2.6718360161 | -1.1488301697 | 0.3290442129  |
| H | -3.003533615  | -0.1508273684 | 0.5786199091  |
| H | -3.4281467855 | -1.8775619604 | 0.0769840033  |
| O | 1.9344787293  | 1.592054934   | -1.1522698249 |
| H | 2.8477421219  | 1.8267088185  | -0.9709816036 |
| H | 1.4597951203  | 1.6641069861  | -0.2879456459 |
| O | 1.23585298    | -1.0274772886 | -1.6499978099 |
| H | 0.9494499416  | -1.133338078  | -2.5602135961 |
| H | 1.5719311012  | -0.1077455644 | -1.5851103543 |

*anti\_Syn*-CH<sub>2</sub>CHCHO carbonyl insertion 2d TS

|   |               |               |               |
|---|---------------|---------------|---------------|
| C | 1.7153299954  | -0.1077267497 | -0.4197623844 |
| H | 2.5848850629  | -0.3895128219 | 0.1616323136  |
| O | 1.3411653607  | 1.1207851321  | -0.3223404085 |
| O | 2.3910180937  | 1.9680957189  | 0.2284884969  |
| C | 0.6647468704  | -1.109721648  | -0.6687154223 |
| H | 1.0282123774  | -2.1069365063 | -0.8752576776 |
| C | -0.6356676241 | -0.8399194129 | -0.6093601737 |
| H | -0.9967806423 | 0.1530931297  | -0.3826433715 |
| H | -1.3694228376 | -1.6159387812 | -0.7733464081 |
| O | 3.939327048   | 1.783852176   | -1.6376345497 |
| H | 3.8593185262  | 2.4983908311  | -2.273816429  |
| H | 3.2579444737  | 1.9874247657  | -0.77052269   |
| O | 2.7197678665  | -0.2958015295 | -2.0143974403 |
| H | 2.0774332707  | -0.2001125746 | -2.7272919129 |
| H | 3.3124551584  | 0.6324702708  | -1.9775329424 |

*anti\_Syn*-CH<sub>2</sub>CHCHO carbonyl insertion 2d vdW

|   |               |               |               |
|---|---------------|---------------|---------------|
| C | -0.471619174  | -0.5021623879 | 0.3581269461  |
| H | 0.5138893203  | -0.757651409  | -0.0229044149 |
| O | -0.6191495502 | 0.5856205172  | 0.983882141   |
| O | 0.4944608402  | 1.385252111   | 1.1830115934  |
| C | -1.6060187172 | -1.3654527751 | 0.1418305962  |
| H | -1.3894191301 | -2.2434599384 | -0.4512309287 |
| C | -2.8393548081 | -1.1467759474 | 0.6154668053  |
| H | -3.0737295773 | -0.2769786289 | 1.212926002   |
| H | -3.6399754927 | -1.8426457969 | 0.4123510381  |
| O | 2.000151647   | 1.5611747009  | -1.0720272809 |
| H | 1.7112821272  | 2.3265261133  | -1.5739573997 |
| H | 1.4749132155  | 1.5617828614  | -0.2356060823 |
| O | 1.796827771   | -1.1062797723 | -1.7315283148 |
| H | 2.6563253224  | -1.5245715686 | -1.8186821512 |
| H | 1.9740592061  | -0.1469200793 | -1.6530845498 |

*anti\_Syn*-CH<sub>2</sub>CHCHO vinyl insertion 2a TS

|   |           |           |           |
|---|-----------|-----------|-----------|
| C | -0.444691 | 0.367057  | -0.442073 |
| O | 0.817284  | 0.309691  | -0.143105 |
| C | -1.359439 | -0.434596 | 0.205614  |
| O | 1.425422  | 1.624332  | -0.250464 |
| H | -0.726141 | 1.1273    | -1.163728 |
| C | -0.987888 | -1.125373 | 1.368236  |
| H | -1.723063 | -1.741117 | 1.863563  |
| H | 0.037945  | -1.435115 | 1.487447  |
| H | -2.398019 | -0.356834 | -0.075929 |

|   |           |           |          |
|---|-----------|-----------|----------|
| O | -0.867811 | 0.184697  | 2.754253 |
| H | -0.242116 | 0.993817  | 2.421652 |
| H | -0.420914 | -0.202487 | 3.517652 |
| O | 0.61461   | 2.041906  | 2.028097 |
| H | 1.038456  | 1.959601  | 1.015073 |
| H | 0.229062  | 2.915409  | 2.126977 |

*anti\_Syn*-CH<sub>2</sub>CHCHO vinyl insertion 2a vdW

|   |               |               |               |
|---|---------------|---------------|---------------|
| C | -0.1231290862 | -0.6189762873 | -1.6437054898 |
| O | 0.2407154723  | 0.2000252662  | -0.7566817915 |
| C | -1.0498679088 | -1.6707964376 | -1.3267600248 |
| O | 1.1514841712  | 1.178660985   | -1.1150404105 |
| H | 0.2986333832  | -0.4818843728 | -2.6344085263 |
| C | -1.5283694453 | -1.9073422713 | -0.0948599724 |
| H | -2.2229293913 | -2.7202178231 | 0.0642000487  |
| H | -1.2364899113 | -1.3128006513 | 0.765106937   |
| H | -1.3418832338 | -2.2873403556 | -2.1663658278 |
| O | -0.4978415529 | -0.0471089265 | 2.428355181   |
| H | 0.1033014198  | 0.6685669749  | 2.1359007817  |
| H | -0.1946535389 | -0.2877726927 | 3.3065836589  |
| O | 1.2387109326  | 1.9615152142  | 1.5045039836  |
| H | 1.3027872966  | 1.784914924   | 0.5363183396  |
| H | 0.9129603928  | 2.861165454   | 1.5834011127  |

*anti\_Syn*-CH<sub>2</sub>CHCHO vinyl insertion 2b TS

|   |               |               |               |
|---|---------------|---------------|---------------|
| C | -0.4706512412 | 0.3601023319  | -0.4501138005 |
| O | 0.7783359544  | 0.3560019313  | -0.1018917227 |
| C | -1.3723013174 | -0.4742432607 | 0.1774190848  |
| O | 1.3387756096  | 1.6943421377  | -0.1901806745 |
| H | -0.7561242543 | 1.1021628215  | -1.1891081099 |
| C | -1.0082477086 | -1.1291632602 | 1.3658459164  |
| H | -1.7199849083 | -1.7847809714 | 1.8451827246  |
| H | 0.0242785266  | -1.3860466099 | 1.5357464461  |
| H | -2.4004580904 | -0.4609983993 | -0.1511482354 |
| O | -0.9152953396 | 0.1354855731  | 2.7840963885  |
| H | -0.2454037739 | 0.9228822728  | 2.50698276    |
| H | -1.787679218  | 0.5446750088  | 2.8268217626  |
| O | 0.572909633   | 2.0286776896  | 2.1345992984  |
| H | 0.9719086123  | 1.9755574647  | 1.1260302227  |
| H | 1.3130423858  | 2.1780532403  | 2.727969539   |

*anti\_Syn*-CH<sub>2</sub>CHCHO vinyl insertion 2b vdW

|   |               |               |               |
|---|---------------|---------------|---------------|
| C | -0.1450158695 | -0.5445293693 | -1.6669990027 |
| O | 0.3203275086  | 0.1640431656  | -0.7335417451 |

|   |               |               |               |
|---|---------------|---------------|---------------|
| C | -1.0191070096 | -1.6478311751 | -1.3766260072 |
| O | 1.1395136611  | 1.2261096012  | -1.0749983806 |
| H | 0.1488767216  | -0.2733711767 | -2.6760923989 |
| C | -1.456818845  | -1.9584523883 | -0.1460101508 |
| H | -2.1148612038 | -2.8048910067 | -0.00816125   |
| H | -1.1808141192 | -1.381335222  | 0.7308984557  |
| H | -1.3211466887 | -2.2273289639 | -2.2387694501 |
| O | -0.5786436238 | -0.0669822267 | 2.4112615445  |
| H | 0.0427477282  | 0.6425372427  | 2.1475250443  |
| H | -1.0980152867 | 0.3060262601  | 3.1269746925  |
| O | 1.1816442505  | 1.9536281282  | 1.5615595556  |
| H | 1.251756315   | 1.8056810367  | 0.5889989538  |
| H | 2.0784044612  | 1.8924740942  | 1.898887139   |

*anti\_Syn*-CH<sub>2</sub>CHCHO vinyl insertion 2c TS

|   |               |               |               |
|---|---------------|---------------|---------------|
| C | -0.4840687383 | 0.3368848936  | -0.4938764958 |
| O | 0.7682597354  | 0.3686272918  | -0.1593866004 |
| C | -1.3623439376 | -0.4898438393 | 0.1741750254  |
| O | 1.3080531734  | 1.7103699442  | -0.3021324804 |
| H | -0.789664174  | 1.0384712712  | -1.2638843335 |
| C | -0.9779214002 | -1.0821181138 | 1.3917203289  |
| H | -1.6643573089 | -1.7500899769 | 1.8905070042  |
| H | 0.063539967   | -1.2939469869 | 1.571328282   |
| H | -2.3903642648 | -0.5244163648 | -0.1536687634 |
| O | -0.9626961633 | 0.2305791839  | 2.7466962552  |
| H | -0.2690433558 | 0.9916165528  | 2.4641144516  |
| H | -1.8348043178 | 0.6388690691  | 2.6932562912  |
| O | 0.6816850969  | 1.9792500114  | 2.0688055381  |
| H | 1.0143507638  | 1.9834728089  | 1.0361590904  |
| H | 0.5723509341  | 2.8807770948  | 2.3763343364  |

*anti\_Syn*-CH<sub>2</sub>CHCHO vinyl insertion 2d TS

|   |           |           |           |
|---|-----------|-----------|-----------|
| C | -0.436158 | 0.378848  | -0.41224  |
| O | 0.824329  | 0.287341  | -0.109258 |
| C | -1.368884 | -0.421963 | 0.20854   |
| O | 1.451214  | 1.596923  | -0.174974 |
| H | -0.698844 | 1.16734   | -1.109936 |
| C | -1.014756 | -1.158238 | 1.349105  |
| H | -1.764424 | -1.774916 | 1.82106   |
| H | 0.003359  | -1.4969   | 1.455848  |
| H | -2.405016 | -0.311018 | -0.070515 |
| O | -0.87023  | 0.09228   | 2.779621  |
| H | -0.254103 | 0.921114  | 2.475081  |
| H | -0.416434 | -0.336659 | 3.515668  |

|   |          |          |          |
|---|----------|----------|----------|
| O | 0.496445 | 2.033228 | 2.03567  |
| H | 1.004762 | 1.929342 | 1.055994 |
| H | 1.11583  | 2.413959 | 2.661654 |

*syn*\_Anti-CH<sub>2</sub>CHCHO

|   |               |               |               |
|---|---------------|---------------|---------------|
| C | 0.4052042055  | -0.2826414234 | -0.4949473575 |
| H | 1.1803652634  | -0.5775018896 | -1.1915879921 |
| O | -0.6640317954 | -0.9575322569 | -0.6396390836 |
| O | -1.7297239675 | -0.6997447797 | 0.1671916737  |
| C | 0.5864903833  | 0.7529967827  | 0.471242511   |
| H | -0.2562113843 | 0.9609604659  | 1.1135459638  |
| C | 1.7464965267  | 1.4191531605  | 0.560651349   |
| H | 2.5820334315  | 1.1980996638  | -0.0913975931 |
| H | 1.8888243368  | 2.2033692767  | 1.2897005289  |

*syn*\_Anti-CH<sub>2</sub>CHCHO carbonyl insertion 1a TS

|   |              |               |               |
|---|--------------|---------------|---------------|
| C | 1.8860798124 | -0.1312195438 | -0.1293091949 |
| O | 1.4765534803 | 0.9923974453  | 0.3720571987  |
| O | 2.5973346467 | 1.9165203348  | 0.3056160537  |
| O | 2.5345609481 | 0.7252725553  | -1.779538316  |
| H | 3.3729459418 | 0.3244247993  | -2.0311719345 |
| H | 2.7490273307 | 1.4886161677  | -0.9988674458 |
| H | 1.0703585872 | -0.751359362  | -0.4890311868 |
| C | 3.1088213741 | -0.7923449986 | 0.3153651257  |
| H | 3.8101798925 | -0.1740078547 | 0.856101595   |
| C | 3.2996956741 | -2.0949936258 | 0.1078878367  |
| H | 2.5844377998 | -2.6956908147 | -0.4400819694 |
| H | 4.1770685124 | -2.6014951029 | 0.4835732376  |

*syn*\_Anti-CH<sub>2</sub>CHCHO carbonyl insertion 1a vdW

|   |               |               |               |
|---|---------------|---------------|---------------|
| C | -0.7235341757 | -0.5086460954 | 0.7467297706  |
| O | -1.0279200003 | 0.7224007925  | 0.7545739474  |
| O | -0.0706897072 | 1.6482245747  | 0.3958455701  |
| O | 0.514069051   | 0.8655995432  | -2.1982728235 |
| H | 0.2684458293  | 1.5014489134  | -2.8738848873 |
| H | 0.3160455732  | 1.3003743266  | -1.3446267376 |
| H | -1.5525140893 | -1.1382087309 | 1.0499805614  |
| C | 0.5488269373  | -1.0523141096 | 0.3950431987  |
| H | 1.3180250671  | -0.3622971146 | 0.086495401   |
| C | 0.7444973047  | -2.3773367545 | 0.4431845368  |
| H | -0.041542343  | -3.0587911709 | 0.7429085421  |
| H | 1.696558553   | -2.8131421744 | 0.1780219205  |

*syn*\_Anti-CH<sub>2</sub>CHCHO carbonyl insertion 1b TS

|   |              |               |               |
|---|--------------|---------------|---------------|
| C | 1.8809427597 | -0.125053994  | -0.1574443026 |
| O | 1.4454515348 | 0.9848585656  | 0.3598338114  |
| O | 2.5442783227 | 1.9367277536  | 0.2962157148  |
| O | 2.618662916  | 0.7353328861  | -1.783148448  |
| H | 1.8712041848 | 1.029705846   | -2.3172397308 |
| H | 2.7521990739 | 1.5085645811  | -0.9834074554 |
| H | 1.0771403622 | -0.7647321642 | -0.5125702906 |
| C | 3.1201891372 | -0.7655961424 | 0.2610040921  |
| H | 3.8413547704 | -0.1353004802 | 0.7585674261  |
| C | 3.3035861666 | -2.0714876623 | 0.0768966467  |
| H | 2.5729458702 | -2.6829943681 | -0.4374162727 |
| H | 4.1936259017 | -2.5697668212 | 0.4329608088  |

*syn*\_Anti-CH<sub>2</sub>CHCHO carbonyl insertion 1a vdW

|   |               |               |               |
|---|---------------|---------------|---------------|
| C | -0.7121901217 | -0.5306465462 | 0.7407159548  |
| O | -1.0386636086 | 0.6945382214  | 0.7636573802  |
| O | -0.0988873134 | 1.6416401865  | 0.4144535685  |
| O | 0.4952530812  | 0.9004667122  | -2.1896882115 |
| H | 0.2370316447  | 1.5397499277  | -2.8573149661 |
| H | 0.2909535348  | 1.3214582801  | -1.330629554  |
| H | -1.5291669812 | -1.1785886273 | 1.0377643913  |
| C | 0.5691205685  | -1.0471012219 | 0.3806065546  |
| H | 1.3252280652  | -0.3397326501 | 0.0790736041  |
| C | 0.7886873321  | -2.368861427  | 0.4126997233  |
| H | 0.0155712666  | -3.0678684263 | 0.7055373029  |
| H | 1.7479635319  | -2.784273429  | 0.140890252   |

*syn*\_Anti-CH<sub>2</sub>CHCHO carbonyl insertion 2a TS

|   |              |               |               |
|---|--------------|---------------|---------------|
| C | 2.0104792685 | -0.2668680202 | -0.342890368  |
| O | 1.532643445  | 0.9199121463  | -0.1275329548 |
| O | 2.5334380632 | 1.8845243193  | 0.3001658466  |
| O | 3.6232167575 | 2.0147007046  | -1.864417179  |
| H | 4.5759566328 | 2.1107862662  | -1.795487027  |
| H | 3.1552423755 | 2.0683285273  | -0.8226141835 |
| O | 2.7264691884 | -0.2347674452 | -2.1024635285 |
| H | 1.9660404005 | -0.1351411353 | -2.6882993437 |
| H | 3.2200539966 | 0.7648929323  | -2.0874991726 |
| H | 1.2167558764 | -0.9623826164 | -0.5913511711 |
| C | 3.1591688791 | -0.7910208478 | 0.4028104857  |
| H | 3.7789600181 | -0.053570144  | 0.8880777405  |
| C | 3.365970279  | -2.0989273286 | 0.5186460019  |
| H | 2.7334477853 | -2.8256191694 | 0.0247318343  |
| H | 4.1824480342 | -2.4859291891 | 1.1113420191  |

*syn*\_Anti-CH<sub>2</sub>CHCHO carbonyl insertion 2a vdW

|   |               |               |               |
|---|---------------|---------------|---------------|
| C | -0.8345911451 | -0.5851784287 | 0.6083569412  |
| O | -1.1480183517 | 0.6390459485  | 0.5694229105  |
| O | -0.2210289167 | 1.5678295377  | 1.0403147924  |
| O | 0.9395329886  | 1.8509845986  | -1.4163488316 |
| H | 1.8615184788  | 2.1058078494  | -1.336899469  |
| H | 0.5607543253  | 1.9044189383  | -0.5072471478 |
| O | 0.1332644802  | -0.7204793211 | -2.1833243583 |
| H | -0.2825204813 | -0.664065942  | -3.0468295015 |
| H | 0.480574746   | 0.1773384571  | -2.0087660548 |
| H | -1.5917712259 | -1.2255545621 | 0.1738925505  |
| C | 0.3678549263  | -1.1087138702 | 1.1766694259  |
| H | 1.0361013516  | -0.4006715072 | 1.6413454142  |
| C | 0.6208879235  | -2.4216595327 | 1.1138036888  |
| H | -0.055503299  | -3.1062370592 | 0.6191649145  |
| H | 1.5198851995  | -2.8420851062 | 1.5407417251  |

*syn*\_Anti-CH<sub>2</sub>CHCHO carbonyl insertion 2b TS

|   |              |               |               |
|---|--------------|---------------|---------------|
| C | 2.069636026  | -0.3197570684 | -0.3619460514 |
| O | 1.6089776513 | 0.8716828395  | -0.1554013287 |
| O | 2.6330846837 | 1.8165641552  | 0.2709231612  |
| O | 3.479355221  | 2.1045428721  | -1.9845078618 |
| H | 2.96440108   | 2.7262834709  | -2.504680843  |
| H | 3.102886379  | 2.1136885109  | -0.9220444343 |
| O | 2.791275918  | -0.2296649534 | -2.1088383368 |
| H | 3.5847545972 | -0.775676851  | -2.144239972  |
| H | 3.1164735781 | 0.8340210588  | -2.1709027884 |
| H | 1.2727581213 | -0.9968400849 | -0.6460567526 |
| C | 3.1951297787 | -0.8695399448 | 0.404098661   |
| H | 3.8840041186 | -0.1476811271 | 0.8146756516  |
| C | 3.3024447286 | -2.1792953351 | 0.613097468   |
| H | 2.5885055946 | -2.8848279932 | 0.2060644941  |
| H | 4.1060765239 | -2.5877115497 | 1.209144933   |

*syn*\_Anti-CH<sub>2</sub>CHCHO carbonyl insertion 2b vdW

|   |               |               |               |
|---|---------------|---------------|---------------|
| C | -0.7908499287 | -0.668789559  | 0.604031374   |
| O | -1.0917345582 | 0.5525560236  | 0.4868240468  |
| O | -0.184469972  | 1.4994022111  | 0.9607497687  |
| O | 0.8492175913  | 2.0198169876  | -1.5054595997 |
| H | 0.4049370368  | 2.7668436545  | -1.9135415717 |
| H | 0.5061779632  | 1.9770507797  | -0.5815470073 |
| O | 0.1055423028  | -0.5962989887 | -2.1709926441 |
| H | 0.7682392175  | -0.9884331094 | -2.7439250065 |
| H | 0.3798050062  | 0.3368931103  | -2.0598027288 |



|   |               |               |              |
|---|---------------|---------------|--------------|
| H | -1.5372377476 | -1.3262897989 | 0.1757237158 |
| C | 0.3855704028  | -1.1680636649 | 1.2458143802 |
| H | 1.0734544885  | -0.4362116749 | 1.6396976066 |
| C | 0.5856585131  | -2.4880878292 | 1.3416354795 |
| H | -0.1174968197 | -3.200034333  | 0.9289509584 |
| H | 1.461662504   | -2.8901918087 | 1.829711228  |

*syn*\_Anti-CH<sub>2</sub>CHCHO carbonyl insertion 2c TS

|   |              |               |               |
|---|--------------|---------------|---------------|
| C | 2.2021599855 | -0.233371397  | -0.2658387057 |
| O | 1.8002950438 | 0.9837609764  | -0.0835480758 |
| O | 2.8957321101 | 1.9188004445  | 0.133680819   |
| O | 3.2314672177 | 2.0942907424  | -2.264421048  |
| H | 4.1159061658 | 2.3665463573  | -2.519609789  |
| H | 3.1293793524 | 2.161818734   | -1.1425974582 |
| O | 2.7285942254 | -0.2831138288 | -2.0703488977 |
| H | 3.5207214278 | -0.8279939349 | -2.1327699805 |
| H | 3.0185673578 | 0.7758067767  | -2.2719257826 |
| H | 1.3583443388 | -0.8978505921 | -0.4104588843 |
| C | 3.3879716068 | -0.7728998525 | 0.4143845468  |
| H | 4.1239532146 | -0.0456417841 | 0.7208632515  |
| C | 3.4948521028 | -2.0725927898 | 0.6786540409  |
| H | 2.734179882  | -2.7826638737 | 0.3780747772  |
| H | 4.3456169688 | -2.4675879784 | 1.2154791864  |

*syn*\_Anti-CH<sub>2</sub>CHCHO carbonyl insertion 2c vdW

|   |               |               |               |
|---|---------------|---------------|---------------|
| C | -0.7680345128 | -0.5521973944 | 0.7543205486  |
| O | -1.1296784485 | 0.6551090875  | 0.6538094156  |
| O | -0.1906776277 | 1.6459254176  | 0.9370914949  |
| O | 0.6710656549  | 1.7534651976  | -1.6529100068 |
| H | 1.5858653241  | 2.0398368893  | -1.7022780241 |
| H | 0.3965481582  | 1.8726808027  | -0.7131108126 |
| O | -0.1200538452 | -0.8950950467 | -2.1111744026 |
| H | -0.6333085385 | -0.9233558871 | -2.9220206997 |
| H | 0.2108693239  | 0.0236310512  | -2.051140963  |
| H | -1.5451501136 | -1.2479101069 | 0.4640836721  |
| C | 0.5101539283  | -0.9920168514 | 1.2187962784  |
| H | 1.1998748696  | -0.2288541523 | 1.5438636401  |
| C | 0.8035788822  | -2.2979691433 | 1.2327238287  |
| H | 0.1014761979  | -3.0405134911 | 0.8770576974  |
| H | 1.7605277471  | -2.6555183726 | 1.5843443331  |

*syn*\_Anti-CH<sub>2</sub>CHCHO carbonyl insertion 2d TS

|   |              |               |               |
|---|--------------|---------------|---------------|
| C | 1.9632930486 | -0.3114865429 | -0.3295219207 |
| O | 1.4810528525 | 0.8802004609  | -0.1522512619 |

|   |              |               |               |
|---|--------------|---------------|---------------|
| O | 2.4788489631 | 1.8711080382  | 0.2171132906  |
| O | 3.7789840719 | 1.7604998943  | -1.8201309335 |
| H | 3.6134983626 | 2.4769938348  | -2.437142538  |
| H | 3.1744571201 | 1.9303341763  | -0.8498770309 |
| O | 2.6015152689 | -0.3468783889 | -2.1280519137 |
| H | 1.8145549372 | -0.1891239833 | -2.6631820436 |
| H | 3.1707786183 | 0.6123097594  | -2.123913484  |
| H | 1.1690237806 | -1.0254154052 | -0.5151004204 |
| C | 3.1537347356 | -0.7943543706 | 0.3746668482  |
| H | 3.8395227107 | -0.0409353168 | 0.7281055251  |
| C | 3.3276951513 | -2.0923986325 | 0.6024759547  |
| H | 2.6296451048 | -2.8367296161 | 0.2407487212  |
| H | 4.1804472738 | -2.4529139077 | 1.1596072069  |

*syn*\_Anti-CH<sub>2</sub>CHCHO carbonyl insertion 2d vdW

|   |               |               |               |
|---|---------------|---------------|---------------|
| C | -0.8728651884 | -0.5156312724 | 0.6449847304  |
| O | -1.2310442808 | 0.6960218169  | 0.5856584356  |
| O | -0.3027558195 | 1.670387926   | 0.9544272443  |
| O | 1.1995196439  | 1.5427135957  | -1.2986076795 |
| H | 1.1947083855  | 2.3672231537  | -1.7901992563 |
| H | 0.688460901   | 1.7184049427  | -0.4709372115 |
| O | -0.0389931952 | -0.8349047857 | -2.161930048  |
| H | -0.4669943386 | -0.7206740103 | -3.0135057057 |
| H | 0.4359146732  | 0.0035578641  | -1.9955734461 |
| H | -1.6358853217 | -1.1960126744 | 0.288464459   |
| C | 0.3840758371  | -0.9794081679 | 1.142305567   |
| H | 1.0582100118  | -0.2372739395 | 1.5405583685  |
| C | 0.6819086564  | -2.2835012926 | 1.0897946409  |
| H | 0.0010058802  | -3.0035750544 | 0.6556014294  |
| H | 1.623862155   | -2.6595861018 | 1.4618694721  |

*syn*\_Anti-CH<sub>2</sub>CHCHO vinyl insertion 1a TS

|   |               |              |               |
|---|---------------|--------------|---------------|
| C | 0.3729533754  | 0.1452428281 | -0.3951727235 |
| H | 1.0315904068  | 0.011915925  | -1.2487147578 |
| O | -0.8354718872 | -0.263613404 | -0.6524023163 |
| O | -1.8142653913 | 0.4023939171 | 0.1704633479  |
| C | 0.7216242085  | 0.7829459486 | 0.7891071283  |
| H | 0.0975212589  | 0.558600114  | 1.6434993866  |
| C | 1.1501988525  | 2.0857246478 | 0.6588242051  |
| H | 1.6303041977  | 2.4323378867 | -0.2441020236 |
| H | 1.2214903814  | 2.7294924132 | 1.5210734556  |
| O | -0.7577254039 | 2.6438212335 | 0.0188759301  |
| H | -1.4536105545 | 1.4609498461 | 0.1186955002  |
| H | -1.2170522044 | 3.4702945239 | 0.2091055174  |

*syn*\_Anti-CH<sub>2</sub>CHCHO vinyl insertion 1a vdW

|   |               |               |               |
|---|---------------|---------------|---------------|
| C | 0.7060397744  | -0.8010849788 | -0.4333574221 |
| H | 1.4430775432  | -1.2063966211 | -1.1174724881 |
| O | -0.469870746  | -1.1855567526 | -0.7119321152 |
| O | -1.5165134389 | -0.7546341531 | 0.0760791305  |
| C | 1.0700763004  | 0.05802314    | 0.6471925216  |
| H | 0.2772813915  | 0.4351864622  | 1.2734681959  |
| C | 2.3572881753  | 0.3769062059  | 0.8413317246  |
| H | 3.1410212678  | 0.0004494934  | 0.1962600029  |
| H | 2.6575706011  | 1.0281248296  | 1.6490452817  |
| O | -1.3522072154 | 1.994454335   | -0.2386764216 |
| H | -1.5786057702 | 1.0479460601  | -0.1395227846 |
| H | -2.0995628834 | 2.3916929794  | -0.6911666255 |

*syn*\_Anti-CH<sub>2</sub>CHCHO vinyl insertion 2a TS

|   |               |               |               |
|---|---------------|---------------|---------------|
| C | 0.4369376405  | -0.2556434263 | -0.396262246  |
| H | 1.1731210469  | -0.4851175896 | -1.1616163478 |
| O | -0.6544567383 | -0.9350006431 | -0.5783055612 |
| O | -1.7594452749 | -0.4350419483 | 0.1932332596  |
| C | 0.6592401657  | 0.6703711087  | 0.5962351473  |
| H | -0.0612852901 | 0.7289447947  | 1.3965345881  |
| C | 1.5158743265  | 1.7417013914  | 0.3648332603  |
| H | 2.236042419   | 1.6870194223  | -0.441048951  |
| H | 1.7726684558  | 2.4126480989  | 1.1678679733  |
| O | 0.3625475437  | 3.0983689264  | -0.428421959  |
| H | 0.6705145571  | 3.2888288979  | -1.3216125173 |
| H | -0.6202394616 | 2.5672296009  | -0.5257783651 |
| O | -1.7252996717 | 1.8452577544  | -0.6509174257 |
| H | -1.8079385703 | 0.7104592268  | -0.2141580392 |
| H | -2.5533141883 | 2.318469815   | -0.5489314062 |

*syn*\_Anti-CH<sub>2</sub>CHCHO vinyl insertion 2a vdW

|   |               |               |               |
|---|---------------|---------------|---------------|
| C | 0.7475260987  | -1.4621879929 | 0.1606787628  |
| H | 1.437561806   | -2.251947776  | -0.1167670604 |
| O | -0.4566855733 | -1.8598425501 | 0.1532522299  |
| O | -1.4557197596 | -0.9640292819 | 0.4976381443  |
| C | 1.1970291459  | -0.1469034522 | 0.4777532678  |
| H | 0.471274104   | 0.6050985528  | 0.7473493753  |
| C | 2.504871899   | 0.1417366874  | 0.4020474933  |
| H | 3.240672538   | -0.6006410335 | 0.1186888145  |
| H | 2.8605332157  | 1.1393102035  | 0.6146457812  |
| O | 0.0045251899  | 2.8487658168  | 0.1477327953  |
| H | -0.5341285284 | 3.4722606898  | 0.6399337018  |

|   |               |              |               |
|---|---------------|--------------|---------------|
| H | -0.6175246638 | 2.3643304691 | -0.4271664157 |
| O | -1.5570510617 | 1.0415719267 | -1.3244928127 |
| H | -1.6064057032 | 0.2835215161 | -0.6952260471 |
| H | -2.4165037074 | 1.0992892244 | -1.7473970303 |

*syn*\_Anti-CH<sub>2</sub>CHCHO vinyl insertion 2b TS

|   |               |               |               |
|---|---------------|---------------|---------------|
| C | 0.4973677897  | -0.2589652322 | -0.4077180661 |
| H | 1.2805420084  | -0.4484466955 | -1.1362601616 |
| O | -0.5636012383 | -0.9598878527 | -0.6665661114 |
| O | -1.7228200761 | -0.5156231846 | 0.059694637   |
| C | 0.6410006832  | 0.6511375685  | 0.6145649701  |
| H | -0.1250444766 | 0.6813388724  | 1.3732504994  |
| C | 1.4775338022  | 1.746221438   | 0.4307637473  |
| H | 2.2434111584  | 1.7200380042  | -0.3304908404 |
| H | 1.6644770231  | 2.4231451393  | 1.2503515282  |
| O | 0.3724343263  | 2.9989822289  | -0.5701881632 |
| H | 0.2428078478  | 3.8068717394  | -0.0605097461 |
| H | -0.6235926227 | 2.4764504109  | -0.6261588417 |
| O | -1.766888229  | 1.8122472685  | -0.6377152028 |
| H | -1.7904714407 | 0.6481618362  | -0.305700324  |
| H | -2.2732911358 | 1.9329490886  | -1.444362305  |

*syn*\_Syn-CH<sub>2</sub>CHCHO

|   |               |               |               |
|---|---------------|---------------|---------------|
| C | 0.7649524651  | -0.4023726008 | -0.5514802227 |
| H | 1.5245304826  | -0.8772098767 | -1.1599139207 |
| O | -0.3582342471 | -0.9939212872 | -0.6831049297 |
| O | -1.43930077   | -0.5410407993 | 0.0051385692  |
| C | 1.0859508727  | 0.7281929335  | 0.2525999871  |
| H | 2.1237605436  | 1.0294667745  | 0.1784701939  |
| C | 0.2519170882  | 1.4190032789  | 1.0559419421  |
| H | -0.7835452194 | 1.14282359    | 1.1494166527  |
| H | 0.6337467844  | 2.2638949871  | 1.6138357282  |

*syn*\_Syn-CH<sub>2</sub>CHCHO carbonyl insertion 1a TS

|   |              |               |               |
|---|--------------|---------------|---------------|
| C | 1.8927194096 | -0.0521068357 | -0.03122508   |
| O | 1.4610263316 | 1.128746787   | 0.2737851309  |
| O | 2.5099375922 | 2.087419324   | -0.0538709367 |
| O | 2.4049529269 | 0.4853911888  | -1.8596158024 |
| H | 3.2606535918 | 0.09927416    | -2.073967372  |
| H | 2.6107546044 | 1.3947855614  | -1.2616960166 |
| H | 1.0706685231 | -0.7377308508 | -0.2200516378 |
| C | 3.1476224005 | -0.667697168  | 0.4166663836  |
| H | 3.2337556982 | -1.7157927876 | 0.1554425012  |
| C | 4.0755030827 | -0.080199092  | 1.1716112134  |

|   |              |               |              |
|---|--------------|---------------|--------------|
| H | 4.0044935276 | 0.9668415363  | 1.4254957308 |
| H | 4.9147503114 | -0.6512238234 | 1.5441008856 |

*syn\_Syn*-CH<sub>2</sub>CHCHO carbonyl insertion 1a vdW

|   |               |               |               |
|---|---------------|---------------|---------------|
| C | -0.7167941752 | -0.8593847335 | 0.8672908568  |
| O | -0.7773037657 | -0.1993532734 | -0.219515842  |
| O | 0.3766604555  | 0.2977963975  | -0.760131888  |
| O | -0.3932353738 | 1.0934652393  | -3.3975980903 |
| H | -0.4179053432 | 2.0526767401  | -3.3841074181 |
| H | -0.1235789067 | 0.8354027987  | -2.4978036629 |
| H | -1.703653845  | -1.1859567856 | 1.1722249564  |
| C | 0.4242176388  | -1.1866844477 | 1.6548571682  |
| H | 0.1861443781  | -1.7658625606 | 2.538321924   |
| C | 1.7067812729  | -0.8563837918 | 1.4035628045  |
| H | 1.9743653443  | -0.28245436   | 0.5339858126  |
| H | 2.4795563199  | -1.1771472229 | 2.0895413788  |

*syn\_Syn*-CH<sub>2</sub>CHCHO carbonyl insertion 1b TS

|   |              |               |               |
|---|--------------|---------------|---------------|
| C | 1.8904510042 | -0.0090478623 | -0.0480131955 |
| O | 1.4743421438 | 1.1715783167  | 0.2844967856  |
| O | 2.5248853084 | 2.1268639808  | -0.0561254538 |
| O | 2.4838789591 | 0.5173695641  | -1.8661365007 |
| H | 1.6937199111 | 0.6997708708  | -2.38884422   |
| H | 2.6607807934 | 1.4236561967  | -1.257307719  |
| H | 1.0605967894 | -0.6905101879 | -0.2247871543 |
| C | 3.155243114  | -0.6346848799 | 0.3428400357  |
| H | 3.2761619615 | -1.6448252477 | -0.0259514633 |
| C | 4.0558835185 | -0.0905299651 | 1.1582343023  |
| H | 3.9524054742 | 0.9259265552  | 1.5070172699  |
| H | 4.9130070224 | -0.6637213413 | 1.4829013132  |

*syn\_Syn*-CH<sub>2</sub>CHCHO carbonyl insertion 1b vdW

|   |               |               |               |
|---|---------------|---------------|---------------|
| C | -0.7131478991 | -0.8637302803 | 0.8567350137  |
| O | -0.7789446392 | -0.1829964943 | -0.2169149761 |
| O | 0.3750656272  | 0.3036220979  | -0.76693246   |
| O | -0.4218695062 | 1.1607317706  | -3.3769735378 |
| H | -0.429213972  | 2.1198218563  | -3.3458352572 |
| H | -0.1427508274 | 0.8815810231  | -2.486407158  |
| H | -1.7007618501 | -1.1784531916 | 1.1715277241  |
| C | 0.4340783154  | -1.2253299215 | 1.6198939954  |
| H | 0.1996238913  | -1.816282808  | 2.4965022458  |
| C | 1.7182218019  | -0.9130472307 | 1.3540520937  |
| H | 1.9823035257  | -0.3281129878 | 0.490760137   |
| H | 2.4958355327  | -1.2597958336 | 2.0216741793  |

*syn\_Syn*-CH<sub>2</sub>CHCHO carbonyl insertion 2a TS

|   |              |               |               |
|---|--------------|---------------|---------------|
| C | 1.9854212336 | -0.1286535049 | -0.2669644299 |
| O | 1.490858831  | 1.066567139   | -0.2016965752 |
| O | 2.4474442825 | 2.1229231538  | 0.0869123619  |
| O | 3.6114342386 | 1.9316500584  | -2.0413232551 |
| H | 4.5621220914 | 2.0206428373  | -1.9383757816 |
| H | 3.1149602591 | 2.1344990406  | -1.0454829935 |
| O | 2.7335862776 | -0.3367704747 | -1.99565163   |
| H | 1.9876746534 | -0.3377176894 | -2.6074402308 |
| H | 3.215607225  | 0.6656451743  | -2.1019546062 |
| H | 1.1839296008 | -0.8376218091 | -0.4524523983 |
| C | 3.1174830166 | -0.6609287132 | 0.5079153447  |
| H | 3.3599718946 | -1.6842827879 | 0.2539879811  |
| C | 3.7482625841 | -0.0378624913 | 1.4995095194  |
| H | 3.5235376723 | 0.9863521759  | 1.7508286375  |
| H | 4.5011561395 | -0.5642941088 | 2.0704520558  |

*syn\_Syn*-CH<sub>2</sub>CHCHO carbonyl insertion 2a vdW

|   |               |               |               |
|---|---------------|---------------|---------------|
| C | -0.9711241339 | -0.7375277391 | 0.5911906873  |
| O | -1.1865474529 | 0.4851953572  | 0.3320142347  |
| O | -0.2618607424 | 1.433361898   | 0.7394958817  |
| O | 0.815755723   | 1.5465177968  | -1.8080579206 |
| H | 1.7206456664  | 1.8668595184  | -1.7951647122 |
| H | 0.467683493   | 1.6831567683  | -0.8996525179 |
| O | 0.2589406869  | -1.2078751371 | -2.0578214878 |
| H | -0.0584837152 | -1.3887712915 | -2.9455270759 |
| H | 0.5124302627  | -0.2639313116 | -2.0629742141 |
| H | -1.7530464167 | -1.3619126644 | 0.1782770322  |
| C | 0.1019704064  | -1.3352318379 | 1.3186540428  |
| H | 0.0543937674  | -2.4161604981 | 1.3400824241  |
| C | 1.1049268558  | -0.6994968483 | 1.9503942795  |
| H | 1.1753439137  | 0.374097963   | 1.9403236911  |
| H | 1.8489686857  | -1.2788379737 | 2.4809796552  |

*syn\_Syn*-CH<sub>2</sub>CHCHO carbonyl insertion 2b TS

|   |              |               |               |
|---|--------------|---------------|---------------|
| C | 2.1545774283 | -0.155410118  | -0.1893383061 |
| O | 1.7630124625 | 1.0743580115  | -0.0848468432 |
| O | 2.8370332665 | 2.0438013989  | 0.0673134397  |
| O | 3.3380509949 | 1.982412618   | -2.3034267735 |
| H | 2.7382490309 | 2.5222632435  | -2.8243475185 |
| H | 3.1302531657 | 2.1555885013  | -1.2070327873 |
| O | 2.6809560317 | -0.3411695288 | -1.9982382167 |
| H | 3.4946012134 | -0.8567022817 | -2.0368293368 |

|   |              |               |               |
|---|--------------|---------------|---------------|
| H | 2.9712851252 | 0.7163926793  | -2.2479672491 |
| H | 1.2862772842 | -0.7912879433 | -0.3225459897 |
| C | 3.2903484932 | -0.7825146108 | 0.505517152   |
| H | 3.3274202627 | -1.8570029838 | 0.3654916069  |
| C | 4.1661801325 | -0.1837428733 | 1.3101190822  |
| H | 4.1453119254 | 0.8835723446  | 1.4600658251  |
| H | 4.9082851829 | -0.7756154574 | 1.828978915   |

*syn\_Syn*-CH<sub>2</sub>CHCHO carbonyl insertion 2b vdW

|   |               |               |               |
|---|---------------|---------------|---------------|
| C | -0.8519839221 | -0.7730021145 | 0.7341395166  |
| O | -1.1132413343 | 0.4398245969  | 0.4727262045  |
| O | -0.1566909867 | 1.4070815897  | 0.7422799328  |
| O | 0.6332398051  | 1.5380768207  | -1.8907643751 |
| H | 0.1534294026  | 2.2187521985  | -2.3689015173 |
| H | 0.3862715132  | 1.6517650944  | -0.9459466115 |
| O | -0.2149881039 | -1.1434576287 | -2.0999668574 |
| H | 0.3907017958  | -1.6355301676 | -2.6587759423 |
| H | 0.0904818551  | -0.2155449592 | -2.1420614199 |
| H | -1.6691057918 | -1.4159782003 | 0.4326083435  |
| C | 0.3076016639  | -1.3386274242 | 1.3457835668  |
| H | 0.265863675   | -2.4173734274 | 1.4248541257  |
| C | 1.3824510024  | -0.6777744523 | 1.8124727665  |
| H | 1.4505711221  | 0.393601945   | 1.7407061191  |
| H | 2.1901783037  | -1.2346888709 | 2.268894148   |

*syn\_Syn*-CH<sub>2</sub>CHCHO carbonyl insertion 2c TS

|   |              |               |               |
|---|--------------|---------------|---------------|
| C | 2.1810112322 | -0.1512947688 | -0.1939239076 |
| O | 1.8173325942 | 1.086500694   | -0.0842426443 |
| O | 2.9152327449 | 2.0273031003  | 0.0781061045  |
| O | 3.211239722  | 2.0313321591  | -2.3289167876 |
| H | 4.0889653239 | 2.2846035993  | -2.624087259  |
| H | 3.1342348617 | 2.1823919338  | -1.2124141522 |
| O | 2.76185923   | -0.3377600015 | -1.9763133669 |
| H | 3.5918761591 | -0.8272283462 | -1.968056303  |
| H | 3.0170948509 | 0.7254269884  | -2.2428421258 |
| H | 1.3004453949 | -0.7642174086 | -0.3537876346 |
| C | 3.2800876507 | -0.8110854933 | 0.5321571089  |
| H | 3.311358588  | -1.8827017069 | 0.3701488458  |
| C | 4.1217128326 | -0.2391037646 | 1.3904003587  |
| H | 4.1012909978 | 0.8249695319  | 1.5635378208  |
| H | 4.8339518172 | -0.8480625168 | 1.9309179422  |

*syn\_Syn*-CH<sub>2</sub>CHCHO carbonyl insertion 2c vdW

|   |               |               |              |
|---|---------------|---------------|--------------|
| C | -0.8985039044 | -0.7377207953 | 0.7228942602 |
|---|---------------|---------------|--------------|

|   |               |               |               |
|---|---------------|---------------|---------------|
| O | -1.1459057997 | 0.4858532163  | 0.498637841   |
| O | -0.1728989998 | 1.4321409049  | 0.7777497462  |
| O | 0.545355025   | 1.550807075   | -1.8932262811 |
| H | 1.4438657413  | 1.8702898775  | -2.0037708879 |
| H | 0.3253050771  | 1.6854507428  | -0.9453475701 |
| O | -0.0438716883 | -1.2024378383 | -2.0708858821 |
| H | -0.4802433784 | -1.3807852636 | -2.9071124156 |
| H | 0.2076891368  | -0.25871273   | -2.1084826943 |
| H | -1.73043651   | -1.3603433671 | 0.4196022324  |
| C | 0.2634572283  | -1.3382472005 | 1.2949075353  |
| H | 0.2179206981  | -2.4191833813 | 1.3200654952  |
| C | 1.3443552668  | -0.705031629  | 1.7846768163  |
| H | 1.4140646768  | 0.3685210418  | 1.7676196173  |
| H | 2.1533994304  | -1.2863956531 | 2.2068361874  |

*syn\_Syn*-CH<sub>2</sub>CHCHO carbonyl insertion 2d TS

|   |              |               |               |
|---|--------------|---------------|---------------|
| C | 2.1075364452 | -0.1958165101 | -0.2418368686 |
| O | 1.60490347   | 0.9916233802  | -0.1060702792 |
| O | 2.5730138599 | 2.0636526347  | 0.0554714333  |
| O | 3.6289566973 | 1.8144734802  | -2.1134186323 |
| H | 3.3112815375 | 2.4448230238  | -2.7644162016 |
| H | 3.1505305952 | 2.0442435905  | -1.1022724553 |
| O | 2.5992072424 | -0.3885672962 | -2.0675949603 |
| H | 1.7660847721 | -0.3639073382 | -2.5524640167 |
| H | 3.0894466544 | 0.6083723309  | -2.2185850843 |
| H | 1.2997810083 | -0.9175878104 | -0.3160282244 |
| C | 3.3468797655 | -0.7102352419 | 0.3577193809  |
| H | 3.5515281396 | -1.7368099395 | 0.0843037294  |
| C | 4.1295365003 | -0.0684378695 | 1.2210223699  |
| H | 3.9483849755 | 0.9604608222  | 1.4865507226  |
| H | 4.9675613369 | -0.5848732568 | 1.6690250867  |

*syn\_Syn*-CH<sub>2</sub>CHCHO carbonyl insertion 2d vdW

|   |               |               |               |
|---|---------------|---------------|---------------|
| C | -0.8698318468 | -0.7621005994 | 0.6954721453  |
| O | -1.1009408298 | 0.4580764773  | 0.4399373549  |
| O | -0.1339926911 | 1.4040725276  | 0.7454468365  |
| O | 0.7296420436  | 1.546388948   | -1.8637590657 |
| H | 0.275968134   | 2.240906714   | -2.3474709224 |
| H | 0.4592260889  | 1.6552807035  | -0.9248146251 |
| O | -0.1630584588 | -1.1161551925 | -2.124154131  |
| H | 0.4481986482  | -1.6140995202 | -2.6715839279 |
| H | 0.1609212435  | -0.1938932358 | -2.1481605229 |
| H | -1.6904372859 | -1.3862406526 | 0.3651946569  |
| C | 0.2617985899  | -1.3559577682 | 1.3322019881  |



|   |              |               |              |
|---|--------------|---------------|--------------|
| H | 0.1975695254 | -2.4344469406 | 1.3987064084 |
| C | 1.3358351326 | -0.7205433756 | 1.8347160615 |
| H | 1.4260956939 | 0.3499988477  | 1.7761469579 |
| H | 2.1201880125 | -1.2973909332 | 2.3068757855 |

*syn\_Syn*-CH<sub>2</sub>CHCHO vinyl insertion 1a TS

|   |           |           |           |
|---|-----------|-----------|-----------|
| C | 0.893647  | -0.44015  | -0.563702 |
| H | 1.682934  | -1.038169 | -1.007893 |
| O | -0.252428 | -0.844493 | -1.002048 |
| O | -1.413677 | -0.116902 | -0.606981 |
| C | 1.219997  | 0.630103  | 0.2527    |
| H | 2.259185  | 0.925689  | 0.2201    |
| C | 0.322096  | 1.412519  | 0.978303  |
| H | -0.570146 | 0.972604  | 1.38572   |
| H | 0.710809  | 2.277892  | 1.496228  |
| O | -0.795478 | 2.263572  | -0.414051 |
| H | -1.543258 | 2.756892  | -0.051907 |
| H | -1.135114 | 1.263798  | -0.628229 |

*syn\_Syn*-CH<sub>2</sub>CHCHO vinyl insertion 1a vdW

|   |               |               |               |
|---|---------------|---------------|---------------|
| C | 1.1823939681  | -0.6797111893 | -0.3153734341 |
| H | 1.6868443463  | -1.263839531  | -1.0755368935 |
| O | 0.1622238723  | -0.0938279598 | -0.8016247608 |
| O | -0.6045708528 | 0.6919794395  | 0.0141911225  |
| C | 1.6864055472  | -0.6442544986 | 1.0165531036  |
| H | 2.5800401157  | -1.2399750015 | 1.155009656   |
| C | 1.173357382   | 0.0353257294  | 2.0616135438  |
| H | 0.2873476797  | 0.6359575644  | 1.9549948483  |
| H | 1.6645740156  | -0.0245526227 | 3.023776001   |
| O | -2.2907858115 | 2.1161984782  | -1.8053671075 |
| H | -3.1627709293 | 1.7265187263  | -1.7122646504 |
| H | -1.7283833331 | 1.629087865   | -1.1765794287 |

*syn\_Syn*-CH<sub>2</sub>CHCHO vinyl insertion 1b TS

|   |           |           |           |
|---|-----------|-----------|-----------|
| C | 0.914422  | -0.537038 | -0.514713 |
| H | 1.714204  | -1.14106  | -0.93143  |
| O | -0.224421 | -0.983341 | -0.925482 |
| O | -1.406051 | -0.279808 | -0.551803 |
| C | 1.222643  | 0.583392  | 0.243435  |
| H | 2.258505  | 0.891148  | 0.202053  |
| C | 0.309921  | 1.378787  | 0.936264  |
| H | -0.576441 | 0.94763   | 1.364563  |
| H | 0.673985  | 2.276464  | 1.415842  |
| O | -0.94906  | 2.158085  | -0.389119 |

|   |           |          |           |
|---|-----------|----------|-----------|
| H | -0.424396 | 2.493716 | -1.125463 |
| H | -1.198087 | 1.151493 | -0.611236 |

*syn\_Syn*-CH<sub>2</sub>CHCHO vinyl insertion 2a TS

|   |               |               |               |
|---|---------------|---------------|---------------|
| C | -0.8096010309 | 0.7213023564  | 0.9565127595  |
| O | -0.0080525867 | -0.0293838122 | 1.6434566619  |
| O | 0.2199918998  | -1.3409591139 | 1.1226363281  |
| O | 1.782201944   | -1.0380210164 | -0.7640627044 |
| H | 2.3568442587  | -1.798206535  | -0.8815577014 |
| H | 1.1996972445  | -1.1831746541 | 0.1239200784  |
| O | -0.1162280477 | -0.6048989854 | -2.2835474666 |
| H | -0.0365189214 | 0.3207966464  | -2.5440764116 |
| H | 0.7503966553  | -0.8244381019 | -1.705821192  |
| H | -0.9260655507 | 1.6742025604  | 1.4640312957  |
| C | -1.4824663819 | 0.5212381431  | -0.2296383971 |
| H | -2.0555887297 | 1.3764670859  | -0.5623700564 |
| C | -1.4857535615 | -0.6352398277 | -1.042421726  |
| H | -1.170730221  | -1.5634947588 | -0.5998827751 |
| H | -2.2602590409 | -0.7063979468 | -1.792196803  |

*syn\_Syn*-CH<sub>2</sub>CHCHO vinyl insertion 2a vdW

|   |               |               |               |
|---|---------------|---------------|---------------|
| C | -0.7655893034 | 1.1466139918  | 1.3725689218  |
| O | 0.1026322613  | 0.3575565778  | 1.8662836589  |
| O | 0.3034599781  | -0.8690351623 | 1.2615248843  |
| O | 2.2176510799  | -0.6674124168 | -0.69038147   |
| H | 2.8324412045  | -1.4019363595 | -0.6244421926 |
| H | 1.616753395   | -0.7483651088 | 0.0837147179  |
| O | 0.3665541389  | -0.4189835432 | -2.7944420999 |
| H | 0.7305401714  | 0.1593465915  | -3.4685165207 |
| H | 1.0774042299  | -0.5250082962 | -2.1330735295 |
| H | -0.8250718995 | 2.0570971388  | 1.9585366876  |
| C | -1.5855131957 | 0.9944032276  | 0.2216369389  |
| H | -2.2021884701 | 1.8605703567  | 0.0171320693  |
| C | -1.6372510384 | -0.0678704153 | -0.6099089941 |
| H | -1.0493245762 | -0.9489292534 | -0.4333898981 |
| H | -2.2844449757 | -0.0402703286 | -1.4744341739 |

*syn\_Syn*-CH<sub>2</sub>CHCHO vinyl insertion 2b TS

|   |               |               |               |
|---|---------------|---------------|---------------|
| C | -0.7988710937 | 0.7168506852  | 0.9186541239  |
| O | 0.0090879955  | -0.0160341507 | 1.6213999626  |
| O | 0.2603699158  | -1.3347740216 | 1.123941473   |
| O | 1.7945948387  | -1.0529256921 | -0.7752701204 |
| H | 2.5062991437  | -0.4262879734 | -0.6260138989 |
| H | 1.2168828579  | -1.1599840615 | 0.1315139262  |

|   |               |               |               |
|---|---------------|---------------|---------------|
| O | -0.083908121  | -0.5478805367 | -2.2834407737 |
| H | -0.1468795205 | -1.303069591  | -2.8823958272 |
| H | 0.7901674038  | -0.7091102181 | -1.6872693859 |
| H | -0.9221786258 | 1.6769780728  | 1.4108370316  |
| C | -1.4664423235 | 0.4959051495  | -0.2637299861 |
| H | -2.0242845722 | 1.3482988746  | -0.6254133919 |
| C | -1.4620282037 | -0.6742961055 | -1.0518510972 |
| H | -1.144218909  | -1.5899499773 | -0.5837074952 |
| H | -2.236508786  | -0.753720454  | -1.8016895407 |

*syn\_Syn*-CH<sub>2</sub>CHCHO vinyl insertion 2b vdW

|   |               |               |               |
|---|---------------|---------------|---------------|
| C | -0.7542799954 | 1.1843861433  | 1.2354717963  |
| O | 0.1302777834  | 0.476016111   | 1.8160098785  |
| O | 0.3400641767  | -0.8199956767 | 1.3794459667  |
| O | 2.1491673616  | -0.8415588863 | -0.6771656552 |
| H | 3.0017940229  | -0.4757138485 | -0.4322159991 |
| H | 1.5972292027  | -0.8334793537 | 0.1364594322  |
| O | 0.3764517021  | -0.1252211252 | -2.7344171773 |
| H | 0.5605457884  | -0.6905295339 | -3.4883874142 |
| H | 1.0694623599  | -0.3379314767 | -2.0807776645 |
| H | -0.8163461588 | 2.1633883958  | 1.6977710543  |
| C | -1.5880155821 | 0.8761546315  | 0.1278312358  |
| H | -2.2165905027 | 1.7020220794  | -0.1798305617 |
| C | -1.6331789331 | -0.2830665358 | -0.5617220928 |
| H | -1.0295884947 | -1.1261093147 | -0.2798967007 |
| H | -2.290713731  | -0.3696366097 | -1.4141900983 |

*syn\_Syn*-CH<sub>2</sub>CHCHO vinyl insertion 2c TS

|   |               |               |               |
|---|---------------|---------------|---------------|
| C | -0.7651777169 | 0.7073711503  | 0.9253910869  |
| O | -0.0147092158 | -0.0671119326 | 1.6469986734  |
| O | 0.1986185957  | -1.3849976177 | 1.1284689079  |
| O | 1.739516885   | -0.985332881  | -0.7332392677 |
| H | 2.4159137706  | -1.6587908938 | -0.8320308289 |
| H | 1.147226901   | -1.1917783829 | 0.1574400831  |
| O | -0.1469981238 | -0.6782059155 | -2.276615831  |
| H | -0.2700400444 | -1.4574190706 | -2.8332707578 |
| H | 0.7373043123  | -0.8443702305 | -1.6874946774 |
| H | -0.842479949  | 1.6753811531  | 1.411119029   |
| C | -1.4252875102 | 0.5173983947  | -0.2664243346 |
| H | -1.9207609316 | 1.4000223522  | -0.6457135569 |
| C | -1.5065510362 | -0.6665240183 | -1.0319338167 |
| H | -1.2560651971 | -1.5914793585 | -0.5418356295 |
| H | -2.2949119996 | -0.706014839  | -1.7706623798 |

*syn\_Syn*-CH<sub>2</sub>CHCHO vinyl insertion 2d TS

|   |               |               |               |
|---|---------------|---------------|---------------|
| C | -0.8441998126 | 0.744621478   | 0.9478886025  |
| O | 0.009173303   | 0.0474197435  | 1.6298420241  |
| O | 0.274918567   | -1.2734267499 | 1.1511810198  |
| O | 1.7826455487  | -1.1168207103 | -0.7936169746 |
| H | 2.5915021852  | -0.6171307329 | -0.6650203515 |
| H | 1.2341767514  | -1.1539533121 | 0.122138677   |
| O | -0.0898992061 | -0.4946939833 | -2.2829045443 |
| H | -0.0670099068 | 0.4478287035  | -2.4874326495 |
| H | 0.7823138359  | -0.7055026947 | -1.7171376987 |
| H | -1.0039989027 | 1.6961994653  | 1.4463267693  |
| C | -1.5235831491 | 0.4949089142  | -0.2243212298 |
| H | -2.1586051608 | 1.3081788572  | -0.5500874948 |
| C | -1.4466659449 | -0.655191957  | -1.0437268506 |
| H | -1.0623277343 | -1.5612524575 | -0.6091014829 |
| H | -2.216086954  | -0.778971904  | -1.7917799359 |

*anti*-CHCCHO

|   |               |               |               |
|---|---------------|---------------|---------------|
| C | 0.4333782279  | -0.1654038816 | -0.0686382025 |
| H | 0.2984471888  | 0.9086274428  | -0.1224781485 |
| O | -0.5654099176 | -0.8636440526 | 0.298988616   |
| O | -1.7114899042 | -0.217412026  | 0.5925922704  |
| C | 1.6374952816  | -0.8066959963 | -0.3804643716 |
| C | 2.7039261319  | -1.2872504251 | -0.6643779965 |
| H | 3.6384949915  | -1.7276900612 | -0.9114781673 |

*anti*-CHCCHO 1a TS

|   |               |               |               |
|---|---------------|---------------|---------------|
| C | 1.0677812171  | 0.2163912086  | -0.056088682  |
| H | 1.1512720592  | 0.6285466021  | 0.9418090416  |
| O | 0.0070226965  | -0.4666725672 | -0.3379197453 |
| O | -1.0982253847 | 0.2428932391  | 0.2688849976  |
| O | 0.3094467042  | 1.9239245207  | -0.694231201  |
| H | -0.5652299722 | 1.3888947176  | -0.246750681  |
| H | 0.5554880769  | 2.6352539866  | -0.0931477877 |
| C | 2.247062497   | -0.0769747166 | -0.7888100447 |
| C | 3.2732280257  | -0.3049589029 | -1.3660432431 |
| H | 4.1726178605  | -0.5154196481 | -1.8910355846 |

*anti*-CHCCHO 1a vdW

|   |               |               |               |
|---|---------------|---------------|---------------|
| C | 0.4359333108  | -0.1523594893 | -0.0680742428 |
| H | 0.3120154023  | 0.9262265991  | -0.1298698881 |
| O | -0.5553819148 | -0.8625470069 | 0.2922234752  |
| O | -1.7277604614 | -0.2415118892 | 0.6020536721  |
| O | -1.1674239563 | 2.4480711541  | 0.0956736035  |

|   |               |               |               |
|---|---------------|---------------|---------------|
| H | -1.6223564282 | 1.6113701138  | 0.3104360364  |
| H | -1.8190430598 | 3.0226597717  | -0.3121300833 |
| C | 1.6366710072  | -0.8039185639 | -0.3803922434 |
| C | 2.7000128704  | -1.2906892872 | -0.6628333873 |
| H | 3.6333522298  | -1.7346704023 | -0.9089639424 |

*anti*-CHCCHOO 1b TS

|   |               |               |               |
|---|---------------|---------------|---------------|
| C | 0.0401651525  | 1.0243142173  | 0.1312591549  |
| H | 0.0341837791  | 0.9072707408  | 1.2071739684  |
| O | -0.8148641053 | 0.3461126998  | -0.5648865983 |
| O | -0.8692674348 | -0.9671119506 | 0.0386551831  |
| O | 1.4514617468  | -0.3518300553 | 0.1667250335  |
| H | 0.5060533327  | -0.9332764914 | 0.1407241835  |
| H | 1.8354271925  | -0.3958206647 | -0.7171392906 |
| C | 0.5220642807  | 2.234110302   | -0.4361861156 |
| C | 0.9424646415  | 3.2695703128  | -0.8719404356 |
| H | 1.3081259842  | 4.1856763393  | -1.2669711033 |

*anti*-CHCCHOO 1b vdW

|   |               |               |               |
|---|---------------|---------------|---------------|
| C | 0.0599710783  | 0.4611761934  | -0.0398148512 |
| H | 0.941009442   | -0.0905936069 | 0.2793092596  |
| O | -1.0437757476 | -0.1601483199 | -0.1519905863 |
| O | -1.0809947847 | -1.4885506806 | 0.1482092275  |
| O | 1.5789072455  | -2.0655436476 | 0.7776788141  |
| H | 0.6252880768  | -2.143112441  | 0.5833806343  |
| H | 1.9876629346  | -2.8879965878 | 0.4991930941  |
| C | 0.0830880869  | 1.8279441331  | -0.3484502363 |
| C | 0.1813298995  | 3.0016293085  | -0.5938601411 |
| H | 0.2528597688  | 4.0386076488  | -0.8138182146 |

*anti*-CHCCHOO 2a TS

|   |               |               |               |
|---|---------------|---------------|---------------|
| C | 1.2362085021  | -0.301335993  | -0.2272840059 |
| H | 1.9312876855  | -1.0260656951 | -0.6323871257 |
| O | 1.6935594456  | 0.8894939489  | -0.0231134575 |
| O | 2.8559987577  | 1.1462053237  | -0.8548305668 |
| O | 0.2553153178  | -0.3011197225 | -1.8100464434 |
| H | -0.6120437571 | 0.0604534852  | -1.5903108929 |
| H | 0.7831185309  | 0.4489384704  | -2.4148793075 |
| O | 1.5692431415  | 1.4338411424  | -2.9230581553 |
| H | 2.2366847131  | 1.4076658586  | -2.0572654813 |
| H | 2.0696131664  | 1.1731407285  | -3.7004910251 |
| C | 0.2470742338  | -0.7435013633 | 0.7133399607  |
| C | -0.5578456871 | -1.1481564425 | 1.5029575628  |
| H | -1.2666841902 | -1.4999047113 | 2.2116496979  |

*anti*-CHCCHOO 2a vdW

|   |               |               |               |
|---|---------------|---------------|---------------|
| C | 0.2231437661  | -0.6082065984 | 0.7735203391  |
| H | 0.6329007907  | -1.3237715771 | 0.073754312   |
| O | 0.7150744232  | 0.5560585089  | 0.8051708839  |
| O | 1.7543819925  | 0.807804761   | -0.0683012181 |
| O | -1.0387504423 | -0.746179682  | -1.6746309064 |
| H | -1.9788172088 | -0.5924229217 | -1.7949491838 |
| H | -0.5895452887 | 0.0293804913  | -2.070902706  |
| O | 0.4422471188  | 1.4804214357  | -2.38606409   |
| H | 0.9970407433  | 1.3747069098  | -1.5811410215 |
| H | 1.0496993853  | 1.456663331   | -3.129495131  |
| C | -0.8075406064 | -0.927821945  | 1.6711671106  |
| C | -1.6764487568 | -1.2756563165 | 2.4253401739  |
| H | -2.446691917  | -1.5681713969 | 3.0961574373  |

*anti*-CHCCHOO 2b TS

|   |               |               |               |
|---|---------------|---------------|---------------|
| C | 1.8466787698  | -1.3303440859 | -0.6760902664 |
| H | 2.3945854329  | -2.2547686365 | -0.8166462646 |
| O | 2.5605791577  | -0.2782998075 | -0.4569438376 |
| O | 3.9133543169  | -0.4641544381 | -0.9565305236 |
| O | 3.3254429666  | -0.1340881982 | -3.3026667814 |
| H | 3.2438580996  | 0.7917142067  | -3.5458497038 |
| H | 3.7096172563  | -0.1959096801 | -2.2745495881 |
| O | 1.2965440436  | -1.1979640358 | -2.4663311703 |
| H | 2.1585359676  | -0.7000357223 | -2.9484285724 |
| H | 1.2046392549  | -2.0779627639 | -2.8502618161 |
| C | 0.5790433196  | -1.3711297756 | -0.0122060705 |
| C | -0.4641837003 | -1.4643268117 | 0.568872262   |
| H | -1.3889151653 | -1.5308532011 | 1.0871104126  |

*anti*-CHCCHOO 2b vdW

|   |               |               |               |
|---|---------------|---------------|---------------|
| C | -0.1222925933 | -0.5309437136 | 0.8639543944  |
| H | 0.2695670404  | -1.4020311143 | 0.356232234   |
| O | 0.6110657018  | 0.4958597547  | 0.9440228378  |
| O | 1.8716092837  | 0.3990356984  | 0.3879255605  |
| O | 1.4653441663  | 0.8602112498  | -2.2810335576 |
| H | 1.4646330089  | 1.8025145678  | -2.4658447645 |
| H | 1.7239170099  | 0.7711981227  | -1.3364861342 |
| O | -0.8629448017 | -0.5648784977 | -1.8354681755 |
| H | -0.0963905005 | -0.0419922113 | -2.1485183    |
| H | -1.0396130124 | -1.2084195648 | -2.5255010514 |
| C | -1.3948493385 | -0.5002579279 | 1.4517521715  |
| C | -2.4889062127 | -0.5504442309 | 1.9468851485  |

|   |              |               |              |
|---|--------------|---------------|--------------|
| H | -3.457168752 | -0.5777241329 | 2.3833906365 |
|---|--------------|---------------|--------------|

*anti*-CHCCHOO 2c TS

|   |               |               |               |
|---|---------------|---------------|---------------|
| C | 1.2335196761  | -0.3295293164 | -0.2238455992 |
| H | 1.9413520864  | -1.0754811541 | -0.5663304163 |
| O | 1.7013279971  | 0.8638156461  | -0.0709652497 |
| O | 2.8827122115  | 1.0566122029  | -0.8946130312 |
| O | 0.258149345   | -0.2890263794 | -1.8167017265 |
| H | 0.3135717827  | -1.1477419598 | -2.2514097745 |
| H | 0.7998196113  | 0.4613248982  | -2.4304751647 |
| O | 1.5596051678  | 1.4608732627  | -2.90556296   |
| H | 2.2611495863  | 1.3834335299  | -2.0560254212 |
| H | 2.0356325406  | 1.2661806973  | -3.7164736137 |
| C | 0.2169054873  | -0.7198657328 | 0.7060048102  |
| C | -0.5961185146 | -1.0993306052 | 1.4994339923  |
| H | -1.3211740274 | -1.4183796494 | 2.2069513344  |

*anti*-CHCCHOO 2c vdW

|   |               |               |               |
|---|---------------|---------------|---------------|
| C | 0.2124455059  | -0.5914982774 | 0.7870938855  |
| H | 0.640415279   | -1.312518818  | 0.1040302913  |
| O | 0.6935018231  | 0.5774751298  | 0.81154396    |
| O | 1.7453696558  | 0.8270153285  | -0.0474036779 |
| O | -1.0060645736 | -0.773370989  | -1.6800456792 |
| H | -1.9452646555 | -0.629543296  | -1.8181060083 |
| H | -0.5569740802 | 0.0008824064  | -2.0789927277 |
| O | 0.4671971104  | 1.4569292458  | -2.3960000673 |
| H | 1.009045139   | 1.3669833527  | -1.5804166611 |
| H | 1.0874747629  | 1.428821778   | -3.1286105441 |
| C | -0.8306255147 | -0.908499727  | 1.671260444   |
| C | -1.7092556044 | -1.2541403418 | 2.4151079081  |
| H | -2.4882948477 | -1.5446827921 | 3.0765598765  |

*anti*-CHCCHOO 2d TS

|   |              |               |               |
|---|--------------|---------------|---------------|
| C | 1.852923785  | -1.2931767279 | -0.6811881218 |
| H | 2.3927310568 | -2.2084553923 | -0.8901876534 |
| O | 2.5647289747 | -0.2497608978 | -0.4085355657 |
| O | 3.9131065434 | -0.3918320248 | -0.9316309919 |
| O | 3.3289939085 | -0.1571199132 | -3.2976435599 |
| H | 3.3189821928 | 0.7552989409  | -3.597017439  |
| H | 3.700949101  | -0.1819158046 | -2.2700373596 |
| O | 1.2771298276 | -1.1808230983 | -2.4487130147 |
| H | 2.1208388356 | -0.6789623041 | -2.9384947396 |
| H | 0.5249154493 | -0.5770762794 | -2.4437696741 |
| C | 0.5981249731 | -1.3721904965 | 0.0103104141  |

|   |               |              |              |
|---|---------------|--------------|--------------|
| C | -0.440778776  | -1.476862444 | 0.5975761575 |
| H | -1.3568794719 | -1.565501408 | 1.1280024581 |

*anti*-CHCCHOO 2d vdW

|   |               |               |               |
|---|---------------|---------------|---------------|
| C | -0.3192558571 | -0.3271212701 | 0.7666546321  |
| H | -0.4386941179 | -0.5229699499 | -0.3011639253 |
| O | 0.8055534456  | 0.037955078   | 1.2285977632  |
| O | 1.8609177593  | 0.1562762045  | 0.366785676   |
| O | 1.4098443174  | 0.9638863756  | -2.230427992  |
| H | 1.5560043229  | 1.9107506096  | -2.2904306978 |
| H | 1.6152162287  | 0.709648574   | -1.303985625  |
| O | -0.9759300922 | -0.3925654738 | -2.274259483  |
| H | -0.1738572402 | 0.1354138198  | -2.4626002536 |
| H | -1.0061665526 | -1.0779945942 | -2.9456741572 |
| C | -1.3855357564 | -0.4524865395 | 1.6694750291  |
| C | -2.349425794  | -0.5860769291 | 2.3765408576  |
| H | -3.1928526635 | -0.6989739048 | 3.0127141758  |

*syn*-CHCCHOO

|   |               |              |               |
|---|---------------|--------------|---------------|
| C | -0.846588585  | 1.1355265099 | -0.0192614881 |
| H | -1.198133844  | 2.148307903  | -0.157559975  |
| O | -1.2079127504 | 0.3420058608 | -0.9514202516 |
| O | -0.8324282641 | -0.947919107 | -0.893394652  |
| C | -0.0731565514 | 0.7476877179 | 1.0775423816  |
| C | 0.5893695125  | 0.4868718689 | 2.047812449   |
| H | 1.1757404825  | 0.2316352465 | 2.8960575361  |

*syn*-CHCCHOO 1a TS

|   |               |               |               |
|---|---------------|---------------|---------------|
| C | 0.9540190435  | 0.2920903979  | 0.1690087161  |
| H | 1.8682092676  | -0.0149155532 | -0.3286583401 |
| O | -0.0721991261 | -0.417930923  | -0.16107998   |
| O | -1.2458039474 | 0.3727825316  | 0.1459571241  |
| O | 0.37434098    | 1.846542701   | -0.8838936873 |
| H | -0.5705556758 | 1.4387108453  | -0.5122793488 |
| H | 0.5530523991  | 2.6458476223  | -0.3762743922 |
| C | 1.0839116622  | 0.9349023079  | 1.4376252257  |
| C | 1.3316484519  | 1.415620066   | 2.5087591771  |
| H | 1.513528545   | 1.8334974041  | 3.4683057355  |

*syn*-CHCCHOO 1a vdW

|   |               |               |               |
|---|---------------|---------------|---------------|
| C | 0.6167982372  | -1.2498699664 | 0.2797753667  |
| H | 1.3258905718  | -2.0667664279 | 0.2633990162  |
| O | -0.3866963214 | -1.4416913009 | -0.479927758  |
| O | -1.3499198242 | -0.4851147882 | -0.5469781643 |



|   |               |               |               |
|---|---------------|---------------|---------------|
| O | -0.1159491342 | 1.9740401453  | -1.3327934374 |
| H | -0.6201286081 | 1.1882062702  | -1.0575613552 |
| H | -0.4982914784 | 2.236357873   | -2.1735637602 |
| C | 0.8005966032  | -0.1097168908 | 1.0612332235  |
| C | 1.0118678189  | 0.8682440904  | 1.7288640643  |
| H | 1.1754041352  | 1.7501539952  | 2.2987688043  |

*syn*-CHCCHOO 1b TS

|   |               |               |               |
|---|---------------|---------------|---------------|
| C | 0.067095935   | 0.8924914284  | 0.3811268336  |
| H | 0.3764036188  | 1.8476108337  | -0.0332560239 |
| O | -0.8716475455 | 0.3174480699  | -0.299298914  |
| O | -0.8275039152 | -1.0906953423 | 0.0414907534  |
| O | 1.4813111337  | -0.3803776954 | -0.1401673554 |
| H | 0.5787430923  | -1.0030459919 | -0.0957329653 |
| H | 1.6614744383  | -0.2384210264 | -1.0778071175 |
| C | 0.2408923738  | 0.7087500144  | 1.7827712118  |
| C | 0.3771514375  | 0.7055437921  | 2.9741014511  |
| H | 0.4807153912  | 0.6694470575  | 4.0304941863  |

*syn*-CHCCHOO 1b vdW

|   |               |               |               |
|---|---------------|---------------|---------------|
| C | -0.8494013774 | 1.1406027047  | -0.0188340016 |
| H | -1.1991122189 | 2.1532508969  | -0.1693219285 |
| O | -1.1990162959 | 0.3458302075  | -0.9499857098 |
| O | -0.8197501604 | -0.9572411849 | -0.8758502438 |
| O | 2.0331852016  | -1.048112506  | -0.6747362979 |
| H | 1.0639544153  | -1.115776777  | -0.7338203234 |
| H | 2.3652340592  | -1.5132111026 | -1.4463049198 |
| C | -0.0931780112 | 0.7628904644  | 1.090164283   |
| C | 0.5804940685  | 0.4861283573  | 2.0474222668  |
| H | 1.1868533192  | 0.2126549397  | 2.876181875   |

*syn*-CHCCHOO 2a TS

|   |               |               |               |
|---|---------------|---------------|---------------|
| C | 1.370126704   | -0.3292959118 | -0.3580062965 |
| H | 0.6337298284  | -0.6943225515 | 0.3492321818  |
| O | 1.7644681826  | 0.8662554694  | -0.0653510587 |
| O | 2.8463211699  | 1.3363753957  | -0.9072517567 |
| O | 0.1639439635  | -0.1968386985 | -1.7883686204 |
| H | -0.5922231093 | 0.2950414123  | -1.4441132871 |
| H | 0.7200326428  | 0.5083838616  | -2.432341161  |
| O | 1.5307824399  | 1.4410501314  | -2.9732377021 |
| H | 2.2004552841  | 1.4798252985  | -2.0993001444 |
| H | 2.0339974545  | 1.1169940868  | -3.7246054962 |
| C | 2.2597866049  | -1.3029992385 | -0.9167542537 |
| C | 2.9628297408  | -2.1990679376 | -1.2873434317 |

|   |             |               |               |
|---|-------------|---------------|---------------|
| H | 3.609341054 | -2.9712263078 | -1.6243369734 |
|---|-------------|---------------|---------------|

*syn*-CHCCHOO 2a vdW

|   |               |               |               |
|---|---------------|---------------|---------------|
| C | -0.1254029014 | -0.4704503599 | 1.2159239231  |
| H | -0.9907003471 | -0.7258949663 | 1.8111791792  |
| O | 0.1388665021  | 0.7673013692  | 1.2018827242  |
| O | 1.1999052894  | 1.189898403   | 0.4339595981  |
| O | -2.0903187827 | -0.3497985498 | -0.8810263378 |
| H | -2.9871121711 | -0.0096419543 | -0.9242142116 |
| H | -1.5373552644 | 0.3204387002  | -1.3299919193 |
| O | -0.2963227381 | 1.5698071684  | -1.8619864571 |
| H | 0.3308638112  | 1.5605546934  | -1.1066235869 |
| H | 0.229503157   | 1.3734211568  | -2.6410555685 |
| C | 0.6285099657  | -1.4442691753 | 0.5520166522  |
| C | 1.2239092736  | -2.3550753708 | 0.0410551913  |
| H | 1.7633992058  | -3.1427901145 | -0.425109187  |

*syn*-CHCCHOO 2b TS

|   |              |               |               |
|---|--------------|---------------|---------------|
| C | 2.0499943164 | -1.454921263  | -0.7356707804 |
| H | 1.0880025384 | -1.4269460343 | -0.2382412603 |
| O | 2.7399503891 | -0.3909537213 | -0.5014538899 |
| O | 4.0632549925 | -0.4443717891 | -1.0975607026 |
| O | 3.2063086586 | 0.0643523652  | -3.3308623425 |
| H | 3.0651137699 | 1.0049309114  | -3.4656796119 |
| H | 3.7099951282 | -0.0775068171 | -2.3665068406 |
| O | 1.3166307481 | -1.2086086884 | -2.4466597863 |
| H | 2.1000864374 | -0.5997426068 | -2.9337166356 |
| H | 1.3056729219 | -2.0624646554 | -2.8959568644 |
| C | 2.6701994704 | -2.7391070385 | -0.889656412  |
| C | 3.0834349242 | -3.8625310672 | -0.9490279296 |
| H | 3.491820025  | -4.8415291155 | -1.003513094  |

*syn*-CHCCHOO 2b vdW

|   |               |               |               |
|---|---------------|---------------|---------------|
| C | -0.5536997869 | -0.2764139035 | 1.1453254692  |
| H | -1.5785776676 | -0.218460015  | 1.4838709274  |
| O | 0.0336647736  | 0.8431714297  | 1.0993681075  |
| O | 1.3295783445  | 0.8683258691  | 0.6304764247  |
| O | 0.6056473098  | 1.3697600932  | -1.984003982  |
| H | 0.6577262656  | 2.3097981313  | -2.1737279193 |
| H | 1.0105627289  | 1.255892245   | -1.0962438836 |
| O | -1.8562311637 | 0.2193605329  | -1.303391121  |
| H | -1.0561994715 | 0.659091711   | -1.6561458886 |
| H | -2.1554430917 | -0.3659391193 | -2.0030815236 |
| C | 0.054179046   | -1.4947723688 | 0.8196049632  |

|   |             |               |              |
|---|-------------|---------------|--------------|
| C | 0.502547806 | -2.5869290425 | 0.5932147598 |
| H | 0.924916907 | -3.538509563  | 0.3810766665 |

*syn*-CHCCHOO 2c TS

|   |              |               |               |
|---|--------------|---------------|---------------|
| C | 1.390563335  | -0.3365660461 | -0.3997668358 |
| H | 0.6000989828 | -0.5825366638 | 0.2992542957  |
| O | 1.8395820056 | 0.8572599968  | -0.2093978309 |
| O | 2.9458700998 | 1.1803245203  | -1.0916884971 |
| O | 0.2430831588 | -0.2191268962 | -1.8694812327 |
| H | 0.345338847  | -1.0274018607 | -2.3857402276 |
| H | 0.6974239341 | 0.6094992405  | -2.4486771497 |
| O | 1.3892705398 | 1.6708063837  | -2.9139619949 |
| H | 2.18653749   | 1.5598242591  | -2.1644566429 |
| H | 1.772860555  | 1.5559637175  | -3.7867779256 |
| C | 2.2508511179 | -1.4089874489 | -0.8148908327 |
| C | 2.8963088969 | -2.3854486367 | -1.0728509776 |
| H | 3.5035295973 | -3.2248224555 | -1.3071212581 |

*syn*-CHCCHOO 2c vdW

|   |               |               |               |
|---|---------------|---------------|---------------|
| C | -0.1711332021 | -0.4572078745 | 1.2231178242  |
| H | -1.0510095436 | -0.7200370281 | 1.7932552141  |
| O | 0.087700085   | 0.7817717002  | 1.2234207825  |
| O | 1.1671448009  | 1.2136264885  | 0.4869476591  |
| O | -2.0792900125 | -0.3330003871 | -0.925423017  |
| H | -2.9762283156 | 0.0032029539  | -0.9908352112 |
| H | -1.5176530399 | 0.3425114672  | -1.3553065639 |
| O | -0.2686331024 | 1.600800212   | -1.8461336197 |
| H | 0.3380993674  | 1.5897884157  | -1.0742707244 |
| H | 0.2788386509  | 1.4116918611  | -2.6119808381 |
| C | 0.6049507934  | -1.4236838256 | 0.5742010738  |
| C | 1.218205144   | -2.3287588024 | 0.0742930042  |
| H | 1.7737813744  | -3.1112661806 | -0.3816345835 |

*syn*-CHCCHOO 2d TS

|   |              |               |               |
|---|--------------|---------------|---------------|
| C | 1.9945059768 | -1.4452418879 | -0.7159160504 |
| H | 1.0447407919 | -1.5401482808 | -0.2015671462 |
| O | 2.6143538002 | -0.3603146682 | -0.3797131044 |
| O | 3.9492152476 | -0.2675693915 | -0.9380678721 |
| O | 3.28574894   | -0.1894241533 | -3.2870128462 |
| H | 3.2644193841 | 0.7034887039  | -3.6400031328 |
| H | 3.6824475125 | -0.1541530389 | -2.2512857283 |
| O | 1.2249394292 | -1.1524508123 | -2.4053932564 |
| H | 2.0883606673 | -0.6849889793 | -2.9198283502 |
| H | 0.5760625699 | -0.4529839455 | -2.2606703314 |

|   |              |               |               |
|---|--------------|---------------|---------------|
| C | 2.695333466  | -2.6589879826 | -1.0016545438 |
| C | 3.2063302859 | -3.7295791464 | -1.1650261387 |
| H | 3.6910673689 | -4.6619294472 | -1.3182573192 |

*syn*-CHCCHOO 2d vdW

|   |               |               |               |
|---|---------------|---------------|---------------|
| C | -0.5408501785 | -0.2638617344 | 1.1828784964  |
| H | -1.549562808  | -0.2867251434 | 1.5706439476  |
| O | 0.0108696019  | 0.873771546   | 1.2573918376  |
| O | 1.2825152375  | 1.0068134372  | 0.7458813461  |
| O | 0.675779432   | 1.0508312109  | -1.9422763757 |
| H | 0.8619842839  | 1.918307145   | -2.3094811573 |
| H | 1.0148482954  | 1.075488743   | -1.019939848  |
| O | -1.9094228207 | 0.1317137015  | -1.3060745287 |
| H | -1.074826983  | 0.4867023864  | -1.6703117806 |
| H | -2.5957198111 | 0.736969851   | -1.5961790115 |
| C | 0.0818582989  | -1.406585191  | 0.6714336908  |
| C | 0.5452688571  | -2.437883512  | 0.2633218286  |
| H | 0.9752095945  | -3.3342914403 | -0.1116084452 |
